# Supplementary material for: Women’s employment patterns after childbirth and the perceived access to and use of flexitime and teleworking
Source: PubMed Central journal article supplement — Hum Relat. 2017 Aug 17;71(1):47–72. doi: 10.1177/0018726717713828 (PMC5714156; doi:10.1177/0018726717713828), 2017-08-17
Supplement: HUM713828_Supplementary_material.pdf [file HUM713828_Supplementary_material.pdf]

**Online only supplementary data for *Human Relations* article:**

**Women's employment patterns after childbirth and the perceived access to and use of flexitime and teleworking**

*Heejung Chung and Mariska van der Horst*

**Appendix 1: Description control variables**

As we explained in the paper, next to these variables of interest, we also created a variety of control variables we think may affect the relationship we are interested in. In this web appendix we give some more detail on how these variables were constructed. The *age* of respondent was taken from a derived variable provided by Understanding Society. The age of the respondent in wave 4 is taken as a control variable.

Educational level was taken from a derived variable of highest qualification in wave 4. Individuals with a “degree” or “other higher degree” were considered to have a *degree*. Individuals with “A-level etc”, “GCSE etc”, “other qualification” or “no qualification” as not having a degree.

Regarding *working hours*, respondent were asked “Thinking about your (main) job, how many hours, excluding overtime and meal breaks, are you expected to work in a normal week?” “And how many hours overtime do you usually work in a normal week?”. We added the responses to these two questions. Individuals who worked less than 16 hours/week on this combined variable were considered to work in a small part-time job, between 16 and 34 hours/week in a large part-time job, between 35 and 47 hours/week in a full-time job, and 48 hours or more per week as working long hours. We used the measurement of wave 2.

For *gender role attitudes*, we looked at three variables in the data. Individuals were asked to what degree they agreed or disagreed (on a five-point scale) with the statement “A pre-school child is likely to suffer if his or her mother works”, “All in all, family life suffers when

the woman has a full-time job”, and “A husband’s job is to earn money, a wife’s job is to look after the home and family”. A higher score means more disagreement, thus a higher score on the factor score refers to more modern gender role attitudes and a lower score to more traditional gender role attitudes. The Cronbach’s alpha for the combination of these variables was 0.79. We used the measurement of wave 2.

We looked at various job-related variables. We take the measurement of these variables at wave 4 when looking at reduction of working hours as more current circumstances may be more important in this case, but at wave 2 for the analyses on employment status because it is only applicable for those in employment. First, we looked at *occupational level*. For this we used a derived variable in the data of the registrar general’s social class of the current job. We coded “professional occupation” and “managerial & technical occupation” as ‘management / professional’; “skilled non-manual” and “skilled manual” as ‘Skilled work’; and “Partly skilled occupation” and “unskilled occupational” and ‘Partly skilled or unskilled work’.

We also controlled for whether there was a *union present* (yes/no). This was taken from the response to the question “Is there a trade union, or a similar body such as a staff association, recognised by your management for negotiating pay or conditions for the people doing your sort of job in your workplace?” with “yes” and “no” as answering categories.

Next, we included whether the respondent was working in the *private* sector (yes/no). This was taken from the question “Do you work for a private firm or business or other limited company or do you work for some other type of organisation?” with answering categories “Private firm or business, a limited company” and “Other type of organisation”.

For *earnings*, we looked at the derived variable of usual gross pay per month. Because people work different number of hours we corrected this for number of working hours by dividing the gross pay by the respondent’s working hours. Because this variable was not normally distributed we took the log of the corrected wages of respondent (continuous).

Next to the job-related variables, we also control for some family-related variables. Again, we take the measurement at wave 4 as the more proximal variables may be most important. For *age of the youngest child in household* we look at the derived variable from the household level dataset. As the youngest child had to be born between waves 2 and 4 it could only be 0, 1, or 2.

*Total number of children* in the household was created from combining the number of biological children in household with number of adoptive children in the household. Because few women had more than 3 children in the household we collapsed this to 3 or more children in the household.

Whether the respondent was *living with a partner* (yes/no) was taken from the marital status of the individual. When the respondent said she was married or in a legal civil partnership, she was coded as living with a partner (in final dataset, only heterosexual couples remained). If she was single, never married, separated though legally married, divorced, or married but not living together, she was coded as not living with a partner. This was changed to living with a partner if she answered on a follow-up question asking whether they were living with someone in the household as a couple. Also, if the respondent was married but in a follow-up question stated that she was not living with her partner this person was coded as not living with a partner.

Whether this *partner worked in paid employment or self-employment*, the *working hours of this partner*, the *earnings of the partner*, and *whether the partner was working flexibly* were all taken from the responses of the partner. As Understanding Society is household data we have in many cases both partners responding to the questionnaire. Although we excluded respondents who were self-employed we did allow for the partner to be self-employed, so we distinguish between not employed, employed, and self-employed. For working hours and earnings of the partner we then also allowed this to be from paid employment or self-

employment. Because income from self-employment could be negative and was negative in a few cases, we recoded these to 0 (no income coming in from self-employment). Like the individuals earnings, also the partner's earnings are logged because it is not a normally distributed variable. Unlike the individual's earnings, this is not corrected for the number of working hours for the partner because it may be their total earnings that is most important for the employment of women. We separately control for how much the partner works to distinguish time availability from financial necessity. Table A1-1 gives the descriptive statistics of all variables used in this paper.

**Table A1–1: Descriptive**

| <b>Variable</b>                         | <b>Observation</b> | <b>Mean</b> | <b>SD</b> | <b>Min.</b> | <b>Max.</b> |
|-----------------------------------------|--------------------|-------------|-----------|-------------|-------------|
| <i>Variables of interest</i>            |                    |             |           |             |             |
| Employed wave 4                         | 523                | 0.79        | –         | 0           | 1           |
| Reduced working hours wave 4            | 410                | 0.48        | –         | 0           | 1           |
| Access to flexible work wave 2          | 519                | 0.45        | –         | 0           | 1           |
| Access to flexitime wave 2              | 519                | 0.35        | –         | 0           | 1           |
| Access to telework wave 2               | 519                | 0.13        | –         | 0           | 1           |
| Access to flexible work wave 4          | 410                | 0.50        | –         | 0           | 1           |
| Access to flexitime wave 4              | 410                | 0.38        | –         | 0           | 1           |
| Access to telework wave 4               | 410                | 0.18        | –         | 0           | 1           |
| Use flexible work wave 2                | 519                | 0.19        | –         | 0           | 1           |
| Use flexitime wave 2                    | 519                | 0.12        | –         | 0           | 1           |
| Use telework wave 2                     | 519                | 0.05        | –         | 0           | 1           |
| Use flexible work wave 4                | 410                | 0.19        | –         | 0           | 1           |
| Use flexitime wave 4                    | 410                | 0.12        | –         | 0           | 1           |
| Use telework wave 4                     | 410                | 0.07        | –         | 0           | 1           |
| <i>Control variables</i>                |                    |             |           |             |             |
| Age wave 4                              | 523                | 32.40       | 5.24      | 18          | 48          |
| Total number of children wave 4         | 523                |             | –         | 1           | 3           |
| 1 child in household                    | 216                | 0.41        | –         |             |             |
| 2 children in household                 | 202                | 0.39        | –         |             |             |
| 3 or more children in household         | 105                | 0.20        | –         |             |             |
| Age youngest child in household         | 523                |             | –         | 0           | 2           |
| Age = 0                                 | 133                | 0.25        | –         |             |             |
| Age = 1                                 | 368                | 0.70        | –         |             |             |
| Age = 2                                 | 22                 | 0.04        | –         |             |             |
| Working hours wave 2                    | 520                |             | –         | 1           | 4           |
| Small part-time (<16 hours/week)        | 36                 | 0.07        | –         |             |             |
| Large part-time (=>16 & <35 hours/week) | 196                | 0.38        | –         |             |             |
| Full-time (=>35 & <=48 hours/week)      | 253                | 0.49        | –         |             |             |
| Long hours (> 48 hours/week)            | 35                 | 0.07        | –         |             |             |
| Occupational level wave 2               | 517                |             | –         | 1           | 3           |
| Management & technical or professional  | 249                | 0.48        | –         |             |             |
| Skilled manual or non–manual            | 177                | 0.34        | –         |             |             |
| Partly skilled or unskilled             | 91                 | 0.18        | –         |             |             |
| Working in private sector wave 2        | 522                | 0.61        | –         | 0           | 1           |
| Union present wave 2                    | 509                | 0.53        | –         | 0           | 1           |
| Log corrected wage wave 2               | 520                | 3.81        | 0.53      | 0.51        | 5.07        |
| Having a degree wave 4                  | 521                | 0.59        | –         | 0           | 1           |
| Gender attitude wave 2                  | 455                | 0.13        | 0.94      | –2.72       | 1.60        |
| Living with partner wave 4              | 523                | 0.89        | –         | 0           | 1           |
| Partner employed wave 4                 | 486                | 0.72        | –         | 0           | 1           |
| Partner self-employed wave 4            | 486                | 0.12        | –         | 0           | 1           |
| Partner’s working hours wave 4          | 447                | 42.43       | 9.41      | 1           | 70          |
| Partner’s log earnings wave 4           | 432                | 7.62        | 0.88      | 0           | 9.62        |
| Partner’s use of flexible work wave 4   | 446                | 0.19        | –         | 0           | 1           |

*Source:* Understanding Society waves 2–4.

Note: SD = standard deviation.

## **Appendix 2: Extra tables**

The tables on the next couple of pages show the analyses on the likelihood of being employed in wave 4. We also included here the full tables for reduction of working hours including all control variables. We also present the full tables showing the result using the sample of first-time models. We did not include these in the main paper due to space issues.

**Table A2–1: logistic regression of the likelihood of being employed on (perceived) access to flexible work**

|                                                   | Flexible work |         | Flexitime   |         | Telework    |         |
|---------------------------------------------------|---------------|---------|-------------|---------|-------------|---------|
|                                                   | Coefficient   | p-value | Coefficient | p-value | Coefficient | p-value |
| Constant                                          | 1.14          | .607    | 1.12        | .617    | 1.44        | .524    |
| <i>Main variables</i>                             |               |         |             |         |             |         |
| Access to flexible work/flexitime/telework wave 2 | 0.17          | .580    | 0.20        | .548    | 0.45        | .383    |
| <i>Control variables</i>                          |               |         |             |         |             |         |
| Age wave 4                                        | 0.04          | .235    | 0.04        | .244    | 0.04        | .225    |
| Age youngest child                                |               |         |             |         |             |         |
| 0 wave 4 (ref)                                    |               |         |             |         |             |         |
| 1 wave 4                                          | 1.05          | .002    | 1.08        | .001    | 1.10        | .001    |
| Total number of children in household             |               |         |             |         |             |         |
| 1 wave 4 (ref)                                    |               |         |             |         |             |         |
| 2 wave 4                                          | 0.25          | .528    | 0.27        | .508    | 0.26        | .520    |
| 3 or more wave 4                                  | –0.53         | .252    | –0.50       | .267    | –0.57       | .221    |
| Gender attitude wave 2                            | 0.37          | .020    | 0.37        | .019    | 0.37        | .019    |
| Having a degree wave 4                            | –0.16         | .670    | –0.16       | .671    | –0.20       | .601    |
| Works small part-time (<16 hours/week) wave 2     | –1.04         | .062    | –1.05       | .060    | –1.02       | .069    |
| Works large part-time (16–34 hours/week) wave 2   | 0.06          | .875    | 0.06        | .877    | 0.07        | .864    |
| Works full-time (35–47 hours/week) wave 2 (ref)   |               |         |             |         |             |         |
| Works long hours (48 hours/week or more) wave 2   | 0.06          | .924    | 0.08        | .909    | 0.04        | .946    |
| Working in private sector wave 2                  | –0.70         | .101    | –0.68       | .109    | –0.72       | .094    |
| Union present wave 2                              | 0.66          | .085    | 0.65        | .090    | 0.67        | .079    |
| Occupational level wave 2                         |               |         |             |         |             |         |
| Management / professional (ref)                   |               |         |             |         |             |         |
| Skilled work                                      | 0.13          | .768    | 0.11        | .795    | 0.15        | .736    |
| Partly skilled or unskilled work                  | –0.71         | .169    | –0.73       | .160    | –0.70       | .176    |
| Log corrected wage wave 2                         | –0.13         | .738    | –0.12       | .759    | –0.19       | .638    |
| Living with partner wave 4                        | 0.16          | .816    | 0.16        | .815    | 0.14        | .840    |
| Partner employed wave 4                           | 0.37          | .551    | 0.38        | .538    | 0.39        | .528    |
| Partner self-employed wave 4                      | 0.77          | .372    | 0.79        | .355    | 0.76        | .372    |
| Partner work hours wave 4                         | –0.02         | .290    | –0.02       | .296    | –0.02       | .275    |
| Partner log earnings wave 4                       | –0.10         | .709    | –0.10       | .703    | –0.11       | .692    |
| Partner uses flexible work wave 4                 | 0.70          | .117    | 0.69        | .122    | 0.71        | .112    |
| Pseudo R <sup>2</sup>                             | 0.20          |         | 0.20        |         | 0.20        |         |

*Source:* Understanding Society waves 2–4. *Note:* n=335. There were few respondents with a child aged 2 and these respondents did not differ in the dependent variable. As a result, these were excluded from this analysis.

**Table A2–2: logistic regression of the likelihood of being employed on use flexible work**

|                                                 | Flexible work |         | Flexitime   |         | Telework    |         |
|-------------------------------------------------|---------------|---------|-------------|---------|-------------|---------|
|                                                 | Coefficient   | p-value | Coefficient | p-value | Coefficient | p-value |
| Constant                                        | 1.32          | .556    | 1.15        | .605    | 1.52        | .501    |
| <i>Main variables</i>                           |               |         |             |         |             |         |
| Use flexible work/flexitime/telework wave 2     | 0.45          | .301    | 0.39        | .481    | 0.75        | .296    |
| <i>Control variables</i>                        |               |         |             |         |             |         |
| Age wave 4                                      | 0.04          | .208    | 0.04        | .244    | 0.04        | .208    |
| Age youngest child                              |               |         |             |         |             |         |
| 0 wave 4 (ref)                                  |               |         |             |         |             |         |
| 1 wave 4                                        | 1.08          | .001    | 1.08        | .001    | 1.10        | .001    |
| Total number of children in household           |               |         |             |         |             |         |
| 1 wave 4 (ref)                                  |               |         |             |         |             |         |
| 2 wave 4                                        | 0.26          | .525    | 0.27        | .496    | 0.26        | .525    |
| 3 or more wave 4                                | –0.59         | .203    | –0.49       | .280    | –0.60       | .202    |
| Gender attitude wave 2                          | 0.37          | .021    | 0.37        | .020    | 0.38        | .018    |
| Having a degree wave 4                          | –0.17         | .648    | –0.15       | .683    | –0.17       | .645    |
| Works small part-time (<16 hours/week) wave 2   | –1.06         | .059    | –1.04       | .065    | –1.05       | .063    |
| Works large part-time (16–34 hours/week) wave 2 | 0.01          | .975    | 0.04        | .916    | 0.04        | .910    |
| Works full-time (35–47 hours/week) wave 2 (ref) |               |         |             |         |             |         |
| Works long hours (48 hours/week or more) wave 2 | 0.00          | .998    | 0.04        | .949    | –0.02       | .977    |
| Working in private sector wave 2                | –0.70         | .102    | –0.67       | .113    | –0.73       | .089    |
| Union present wave 2                            | 0.74          | .057    | 0.67        | .078    | 0.70        | .067    |
| Occupational level wave 2                       |               |         |             |         |             |         |
| Management / professional (ref)                 |               |         |             |         |             |         |
| Skilled work                                    | 0.17          | .700    | 0.15        | .733    | 0.14        | .749    |
| Partly skilled or unskilled work                | –0.65         | .213    | –0.70       | .181    | –0.70       | .179    |
| Log corrected wage wave 2                       | –0.16         | .681    | –0.11       | .778    | –0.19       | .625    |
| Living with partner wave 4                      | 0.17          | .804    | 0.17        | .806    | 0.11        | .877    |
| Partner employed wave 4                         | 0.38          | .542    | 0.39        | .523    | 0.41        | .508    |
| Partner self-employed wave 4                    | 0.75          | .383    | 0.76        | .375    | 0.80        | .348    |
| Partner work hours wave 4                       | –0.02         | .279    | –0.02       | .300    | –0.02       | .260    |
| Partner log earnings wave 4                     | –0.12         | .652    | –0.11       | .664    | –0.11       | .671    |
| Partner uses flexible work wave 4               | 0.70          | .118    | 0.71        | .112    | 0.72        | .109    |
| Pseudo R <sup>2</sup>                           | 0.20          |         | 0.20        |         | 0.20        |         |

*Source:* Understanding Society waves 2–4. *Note:* n=335. There were few respondents with a child aged 2 and these respondents did not differ in the dependent variable. As a result, these were excluded from this analysis.



**Table A2–3: logistic regression of the likelihood of reducing working hours on (perceived) access to flexible work**

|                                                           | Flexible work |         | Flexitime   |         | Telework    |         | Flexitime & Telework |         |
|-----------------------------------------------------------|---------------|---------|-------------|---------|-------------|---------|----------------------|---------|
|                                                           | Coefficient   | p-value | Coefficient | p-value | Coefficient | p-value | Coefficient          | p-value |
| Constant                                                  | 5.53          | .010    | 5.54        | .011    | 4.86        | .024    | 4.64                 | .036    |
| <i>Main variables</i>                                     |               |         |             |         |             |         |                      |         |
| No access to flexible work/flexitime in either wave (ref) |               |         |             |         |             |         |                      |         |
| Access to flexible work/flexitime in wave 4 only          | −0.39         | .462    | 0.09        | .860    |             |         | 0.15                 | .776    |
| Access to flexible work/flexitime in wave 2 only          | −0.36         | .458    | 0.00        | .994    |             |         | 0.15                 | .755    |
| Access to flexible work/flexitime in both waves           | −0.70         | .065    | −0.43       | .257    |             |         | 0.19                 | .675    |
| No access to telework in either wave (ref)                |               |         |             |         |             |         |                      |         |
| Access to telework in wave 4 only                         |               |         |             |         | −1.36       | .022    | −1.47                | .025    |
| Access to telework in wave 2 only                         |               |         |             |         | −0.39       | .650    | −0.45                | .608    |
| Access to telework in both waves                          |               |         |             |         | −1.07       | .029    | −1.15                | .035    |
| <i>Control variables</i>                                  |               |         |             |         |             |         |                      |         |
| Works small part-time (<16 hours/week) wave 2             | −2.26         | .012    | −2.15       | .017    | −2.27       | .013    | −2.28                | .013    |
| Works large part-time (16–34 hours/week) wave 2           | −1.42         | <.001   | −1.40       | <.001   | −1.48       | <.001   | −1.48                | <.001   |
| Works full-time (35–47 hours/week) wave 2 (ref)           |               |         |             |         |             |         |                      |         |
| Works long hours (48 hours/week or more) wave 2           | 1.75          | .025    | 1.74        | .028    | 1.87        | .017    | 1.93                 | .017    |
| Age wave 4                                                | −0.03         | .461    | −0.02       | .509    | −0.03       | .455    | −0.03                | .469    |
| Age youngest child                                        |               |         |             |         |             |         |                      |         |
| 0 wave 4 (ref)                                            |               |         |             |         |             |         |                      |         |
| 1 wave 4                                                  | 0.92          | .019    | 0.89        | .022    | 0.86        | .026    | 0.86                 | .027    |
| 2 wave 4                                                  | 1.60          | .025    | 1.62        | .022    | 1.61        | .026    | 1.60                 | .028    |
| Total number of children in household                     |               |         |             |         |             |         |                      |         |
| 1 wave 4 (ref)                                            |               |         |             |         |             |         |                      |         |
| 2 wave 4                                                  | −1.45         | <.001   | −1.46       | <.001   | −1.55       | <.001   | −1.56                | <.001   |
| 3 or more wave 4                                          | −1.15         | .022    | −1.17       | .020    | −1.09       | .033    | −1.08                | .036    |
| Gender attitude wave 2                                    | −0.29         | .113    | −0.31       | .091    | −0.30       | .105    | −0.30                | .109    |
| Having a degree wave 4                                    | −0.69         | .082    | −0.73       | .068    | −0.66       | .107    | −0.66                | .111    |
| Working in private sector wave 4                          | 0.58          | .143    | 0.47        | .240    | 0.61        | .130    | 0.62                 | .130    |
| Union present wave 4                                      | 0.20          | .606    | 0.22        | .572    | 0.15        | .702    | 0.13                 | .739    |
| Occupational level wave 4                                 |               |         |             |         |             |         |                      |         |
| Management / professional (ref)                           |               |         |             |         |             |         |                      |         |
| Skilled work                                              | −1.09         | .012    | −1.09       | .011    | −1.18       | .008    | −1.19                | .008    |
| Partly skilled or unskilled work                          | −0.52         | .362    | −0.44       | .434    | −0.50       | .375    | −0.46                | .423    |
| Log corrected wage wave 4                                 | −0.20         | .615    | −0.25       | .532    | −0.14       | .737    | −0.13                | .753    |
| Living with partner wave 4                                | −3.98         | <.001   | −3.88       | <.001   | −4.08       | <.001   | −4.07                | <.001   |
| Partner employed wave 4                                   | 3.09          | .001    | 2.95        | .001    | 3.22        | <.001   | 3.22                 | .001    |
| Partner self-employed wave 4                              | 3.49          | .001    | 3.36        | .001    | 3.64        | <.001   | 3.65                 | .001    |
| Partner work hours wave 4                                 | −0.00         | .767    | −0.01       | .671    | −0.01       | .707    | −0.01                | .704    |
| Partner log earnings wave 4                               | −0.16         | .347    | −0.15       | .357    | −0.09       | .589    | −0.08                | .641    |
| Partner uses flexible work wave 4                         | −0.68         | .081    | −0.67       | .085    | −0.66       | .096    | −0.66                | .095    |
| Pseudo R <sup>2</sup>                                     | 0.28          |         | 0.27        |         | 0.29        |         | 0.29                 |         |

Source: Understanding Society waves 2–4. Note: n=272.

**Table A2–4: logistic regression of the likelihood of reducing working hours on use of flexible work**

|                                                     | Flexible work |         | Flexitime   |         | Telework    |         | Flexitime & Telework |         |
|-----------------------------------------------------|---------------|---------|-------------|---------|-------------|---------|----------------------|---------|
|                                                     | Coefficient   | p-value | Coefficient | p-value | Coefficient | p-value | Coefficient          | p-value |
| Constant                                            | 5.82          | .011    | 5.63        | .011    | 4.86        | .023    | 5.57                 | .013    |
| <i>Main variables</i>                               |               |         |             |         |             |         |                      |         |
| No use flexible work/flexitime in either wave (ref) |               |         |             |         |             |         |                      |         |
| Use flexible work/flexitime in wave 4 only          | -1.86         | .012    | -1.26       | .157    |             |         | -1.04                | .268    |
| Use flexible work/flexitime in wave 2 only          | -0.77         | .157    | -0.38       | .498    |             |         | -0.34                | .547    |
| Use flexible work/flexitime in both waves           | -1.82         | .001    | -2.12       | .001    |             |         | -2.06                | .003    |
| No use telework in either wave (ref)                |               |         |             |         |             |         |                      |         |
| Use telework in wave 4 only                         |               |         |             |         | -1.61       | .080    | -1.19                | .264    |
| Use telework in wave 2 only                         |               |         |             |         | -0.13       | .915    | 0.32                 | .804    |
| Use telework in both waves                          |               |         |             |         | -0.78       | .326    | -0.27                | .740    |
| <i>Control variables</i>                            |               |         |             |         |             |         |                      |         |
| Works small part-time (<16 hours/week) wave 2       | -2.25         | .015    | -2.01       | .026    | -2.06       | .023    | -1.98                | .028    |
| Works large part-time (16–34 hours/week) wave 2     | -1.49         | <.001   | -1.36       | <.001   | -1.30       | .001    | -1.33                | .001    |
| Works full-time (35–47 hours/week) wave 2 (ref)     |               |         |             |         |             |         |                      |         |
| Works long hours (48 hours/week or more) wave 2     | 1.85          | .019    | 1.50        | .059    | 2.06        | .009    | 1.61                 | .046    |
| Age wave 4                                          | -0.03         | .421    | -0.01       | .686    | -0.03       | .442    | -0.02                | .643    |
| Age youngest child                                  |               |         |             |         |             |         |                      |         |
| 0 wave 4 (ref)                                      |               |         |             |         |             |         |                      |         |
| 1 wave 4                                            | 0.89          | .026    | 0.91        | .022    | 0.75        | .052    | 0.84                 | .035    |
| 2 wave 4                                            | 1.59          | .032    | 1.50        | .034    | 1.45        | .039    | 1.47                 | .040    |
| Total number of children in household               |               |         |             |         |             |         |                      |         |
| 1 wave 4 (ref)                                      |               |         |             |         |             |         |                      |         |
| 2 wave 4                                            | -1.53         | <.001   | -1.67       | <.001   | -1.47       | <.001   | -1.70                | <.001   |
| 3 or more wave 4                                    | -1.11         | .032    | -1.39       | .008    | -1.07       | .034    | -1.37                | .009    |
| Gender attitude wave 2                              | -0.23         | .238    | -0.22       | .251    | -0.29       | .115    | -0.21                | .265    |
| Having a degree wave 4                              | -0.62         | .138    | -0.66       | .105    | -0.63       | .110    | -0.63                | .125    |
| Working in private sector wave 4                    | 0.60          | .140    | 0.34        | .408    | 0.64        | .111    | 0.41                 | .332    |
| Union present wave 4                                | 0.12          | .762    | 0.16        | .684    | 0.12        | .754    | 0.14                 | .718    |
| Occupational level wave 4                           |               |         |             |         |             |         |                      |         |
| Management / professional (ref)                     |               |         |             |         |             |         |                      |         |
| Skilled work                                        | -1.32         | .004    | -1.11       | .014    | -1.14       | .009    | -1.15                | .013    |
| Partly skilled or unskilled work                    | -0.63         | .278    | -0.50       | .383    | -0.41       | .463    | -0.52                | .361    |
| Log corrected wage wave 4                           | -0.24         | .559    | -0.26       | .520    | -0.20       | .627    | -0.24                | .554    |
| Living with partner wave 4                          | -3.95         | <.001   | -3.97       | <.001   | -3.79       | <.001   | -3.95                | <.001   |
| Partner employed wave 4                             | 3.20          | <.001   | 3.00        | .001    | 3.03        | .001    | 3.06                 | .001    |
| Partner self-employed wave 4                        | 3.71          | <.001   | 3.45        | .001    | 3.48        | .001    | 3.50                 | .001    |
| Partner work hours wave 4                           | -0.01         | .588    | -0.01       | .496    | -0.01       | .676    | -0.01                | .489    |
| Partner log earnings wave 4                         | -0.13         | .467    | -0.13       | .449    | -0.10       | .525    | -0.12                | .468    |
| Partner uses flexible work wave 4                   | -0.63         | .123    | -0.65       | .109    | -0.67       | .092    | -0.64                | .114    |
| Pseudo R <sup>2</sup>                               | 0.32          |         | 0.30        |         | 0.28        |         | 0.31                 |         |

Source: Understanding Society waves 2–4. Note: n=272.

**Table A2–5: logistic regression of the likelihood of being employed on (perceived) access to flexible work – only first child**

|                                                   | Flexible work |         | Flexitime   |         | Telework    |         |
|---------------------------------------------------|---------------|---------|-------------|---------|-------------|---------|
|                                                   | Coefficient   | p-value | Coefficient | p-value | Coefficient | p-value |
| Constant                                          | 2.56          | .628    | 2.71        | .618    | 3.04        | .574    |
| <i>Main variables</i>                             |               |         |             |         |             |         |
| Access to flexible work/flexitime/telework wave 2 | 0.94          | .095    | 1.06        | .086    | 1.64        | .150    |
| <i>Control variables</i>                          |               |         |             |         |             |         |
| Age wave 4                                        | -0.09         | .126    | -0.09       | .131    | -0.11       | .081    |
| Age youngest child                                |               |         |             |         |             |         |
| 0 wave 4 (ref)                                    |               |         |             |         |             |         |
| 1 wave 4                                          | 0.06          | .928    | 0.21        | .738    | 0.14        | .826    |
| Gender attitude wave 2                            | -0.12         | .703    | -0.08       | .807    | -0.04       | .902    |
| Having a degree wave 4                            | 0.13          | .837    | 0.20        | .755    | 0.27        | .674    |
| Works small part-time (<16 hours/week) wave 2     | -1.57         | .332    | -1.60       | .333    | -1.93       | .237    |
| Works large part-time (16–34 hours/week) wave 2   | 0.63          | .482    | 0.56        | .544    | 0.64        | .466    |
| Works full-time (35–47 hours/week) wave 2 (ref)   |               |         |             |         |             |         |
| Works long hours (48 hours/week or more) wave 2   | 0.63          | .483    | 0.57        | .520    | 0.67        | .457    |
| Working in private sector wave 2                  | -0.56         | .526    | -0.49       | .583    | -0.48       | .593    |
| Union present wave 2                              | 1.19          | .086    | 1.24        | .078    | 1.31        | .060    |
| Occupational level wave 2                         |               |         |             |         |             |         |
| Management / professional (ref)                   |               |         |             |         |             |         |
| Skilled work                                      | -0.45         | .535    | -0.46       | .530    | -0.14       | .842    |
| Partly skilled or unskilled work                  | -0.77         | .430    | -0.86       | .391    | -0.59       | .553    |
| Log corrected wage wave 2                         | -0.12         | .838    | -0.16       | .796    | -0.10       | .869    |
| Living with partner wave 4                        | 1.13          | .376    | 1.14        | .372    | 1.11        | .390    |
| Partner employed wave 4                           | 0.28          | .799    | 0.34        | .754    | 0.46        | .675    |
| Partner work hours wave 4                         | -0.01         | .744    | -0.01       | .885    | -0.01       | .812    |
| Partner log earnings wave 4                       | 0.13          | .860    | 0.06        | .933    | 0.07        | .922    |
| Partner uses flexible work wave 4                 | 0.64          | .386    | 0.67        | .365    | 0.68        | .349    |
| Pseudo R <sup>2</sup>                             | 0.23          |         | 0.24        |         | 0.23        |         |

*Source:* Understanding Society waves 2–4. *Note:* n=131. There were few respondents with a child aged 2 and these respondents did not differ in the dependent variable. Similarly, whether the partner was self-employed perfectly predicted the outcome variable. As a result, respondents with a child aged 2 or with a partner who was self-employed were excluded from this analysis.

**Table A2–6: logistic regression of the likelihood of being employed on use flexible work – only first child**

|                                                 | Flexible work |         | Flexitime   |         | Telework    |         |
|-------------------------------------------------|---------------|---------|-------------|---------|-------------|---------|
|                                                 | Coefficient   | p-value | Coefficient | p-value | Coefficient | p-value |
| Constant                                        | 2.27          | .664    | 1.80        | .734    |             |         |
| <i>Main variables</i>                           |               |         |             |         |             |         |
| Use flexible work/flexitime/telework wave 2     | 1.12          | .199    | 1.84        | .110    | -           | -       |
| <i>Control variables</i>                        |               |         |             |         |             |         |
| Age wave 4                                      | -0.09         | .123    | -0.10       | .117    |             |         |
| Age youngest child                              |               |         |             |         |             |         |
| 0 wave 4 (ref)                                  |               |         |             |         |             |         |
| 1 wave 4                                        | 0.16          | .796    | 0.12        | .846    |             |         |
| Gender attitude wave 2                          | -0.09         | .788    | -0.11       | .733    |             |         |
| Having a degree wave 4                          | 0.26          | .688    | 0.27        | .685    |             |         |
| Works small part-time (<16 hours/week) wave 2   | -2.01         | .232    | -1.97       | .244    |             |         |
| Works large part-time (16–34 hours/week) wave 2 | 0.56          | .526    | 0.71        | .410    |             |         |
| Works full-time (35–47 hours/week) wave 2 (ref) |               |         |             |         |             |         |
| Works long hours (48 hours/week or more) wave 2 | 0.61          | .508    | 0.68        | .463    |             |         |
| Working in private sector wave 2                | -0.17         | .852    | 0.00        | .998    |             |         |
| Union present wave 2                            | 1.42          | .042    | 1.49        | .035    |             |         |
| Occupational level wave 2                       |               |         |             |         |             |         |
| Management / professional (ref)                 |               |         |             |         |             |         |
| Skilled work                                    | -0.40         | .580    | -0.49       | .508    |             |         |
| Partly skilled or unskilled work                | -0.56         | .567    | -0.62       | .533    |             |         |
| Log corrected wage wave 2                       | -0.07         | .906    | -0.06       | .923    |             |         |
| Living with partner wave 4                      | 1.11          | .381    | 1.16        | .364    |             |         |
| Partner employed wave 4                         | 0.54          | .613    | 0.53        | .619    |             |         |
| Partner work hours wave 4                       | -0.01         | .770    | -0.01       | .799    |             |         |
| Partner log earnings wave 4                     | 0.07          | .921    | 0.10        | .887    |             |         |
| Partner uses flexible work wave 4               | 0.60          | .414    | 0.64        | .380    |             |         |
| Pseudo R <sup>2</sup>                           | 0.23          |         | 0.24        |         |             |         |

*Source:* Understanding Society waves 2–4. *Note:* n=131. There were few respondents with a child aged 2 and these respondents did not differ in the dependent variable. Similarly, whether the partner was self-employed perfectly predicted the outcome variable. As a result, respondents with a child aged 2 or with a partner who was self-employed were excluded from this analysis. Teleworking perfectly predicted employment and therefore the analysis for telework was not done.

**Table A2–7: logistic regression of the likelihood of reducing working hours on (perceived) access to flexible work – only first child**

|                                                           | Flexible work   |         | Flexitime       |         | Telework        |         | Flexitime & Telework |         |
|-----------------------------------------------------------|-----------------|---------|-----------------|---------|-----------------|---------|----------------------|---------|
|                                                           | Coefficien<br>t | p-value | Coefficien<br>t | p-value | Coefficien<br>t | p-value | Coefficient          | p-value |
| Constant                                                  | 6.42            | .122    | 9.25            | .046    | 4.88            | .240    | 9.48                 | .061    |
| <i>Main variables</i>                                     |                 |         |                 |         |                 |         |                      |         |
| No access to flexible work/flexitime in either wave (ref) |                 |         |                 |         |                 |         |                      |         |
| Access to flexible work/flexitime in wave 4 only          | -0.79           | .488    | -1.22           | .312    |                 |         | -1.21                | .326    |
| Access to flexible work/flexitime in wave 2 only          | -0.03           | .973    | 0.18            | .847    |                 |         | 0.37                 | .703    |
| Access to flexible work/flexitime in both waves           | -1.87           | .017    | -1.96           | .006    |                 |         | -1.83                | .027    |
| No access to telework in either wave (ref)                |                 |         |                 |         |                 |         |                      |         |
| Access to telework in wave 4 only                         |                 |         |                 |         | -1.88           | .033    | -0.79                | .434    |
| Access to telework in wave 2 only                         |                 |         |                 |         | -0.49           | .682    | -0.35                | .779    |
| Access to telework in both waves                          |                 |         |                 |         | -0.72           | .359    | 0.35                 | .705    |
| <i>Control variables</i>                                  |                 |         |                 |         |                 |         |                      |         |
| Works small part-time (<16 hours/week) wave 2             | -               | -       | -               | -       | -               | -       | -                    | -       |
| Works large part-time (16–34 hours/week) wave 2           | -1.80           | .025    | -1.77           | .032    | -1.38           | .064    | -1.72                | .039    |
| Works full-time (35–47 hours/week) wave 2 (ref)           |                 |         |                 |         |                 |         |                      |         |
| Works long hours (48 hours/week or more) wave 2           | 4.79            | .030    | 4.92            | .024    | 4.92            | .022    | 5.08                 | .022    |
| Age wave 4                                                | -0.11           | .125    | -0.11           | .130    | -0.13           | .097    | -0.11                | .148    |
| Age youngest child                                        |                 |         |                 |         |                 |         |                      |         |
| 0 wave 4 (ref)                                            |                 |         |                 |         |                 |         |                      |         |
| 1 wave 4                                                  | 1.94            | .011    | 1.91            | .013    | 1.63            | .030    | 1.92                 | .015    |
| 2 wave 4                                                  | 4.37            | .029    | 4.79            | .020    | 3.01            | .079    | 4.77                 | .028    |
| Gender attitude wave 2                                    | 0.12            | .782    | 0.03            | .946    | 0.04            | .926    | 0.01                 | .976    |
| Having a degree wave 4                                    | -0.96           | .248    | -1.21           | .155    | -1.21           | .132    | -1.35                | .130    |
| Working in private sector wave 4                          | 0.72            | .279    | 0.42            | .534    | 0.76            | .261    | 0.53                 | .455    |
| Union present wave 4                                      | -0.73           | .290    | -0.74           | .282    | -0.53           | .439    | -0.69                | .325    |
| Occupational level wave 4                                 |                 |         |                 |         |                 |         |                      |         |
| Management / professional (ref)                           |                 |         |                 |         |                 |         |                      |         |
| Skilled work                                              | -0.01           | .986    | -0.04           | .960    | -0.01           | .990    | -0.06                | .948    |
| Partly skilled or unskilled work                          | -0.25           | .824    | -0.32           | .768    | 0.13            | .908    | -0.34                | .759    |
| Log corrected wage wave 4                                 | 0.22            | .775    | -0.04           | .958    | 0.52            | .508    | -0.04                | .966    |
| Living with partner wave 4                                | -4.58           | .022    | -4.73           | .020    | -3.88           | .048    | -4.80                | .021    |
| Partner employed wave 4                                   | 5.10            | .003    | 5.13            | .003    | 4.55            | .003    | 5.25                 | .002    |
| Partner self-employed wave 4                              | 3.33            | .049    | 3.00            | .070    | 3.25            | .049    | 3.16                 | .059    |
| Partner work hours wave 4                                 | 0.01            | .868    | -0.02           | .526    | -0.01           | .799    | -0.03                | .474    |
| Partner log earnings wave 4                               | -0.25           | .592    | -0.27           | .566    | -0.17           | .700    | -0.29                | .559    |
| Partner uses flexible work wave 4                         | -2.08           | .007    | -2.30           | .004    | -1.97           | .007    | -2.36                | .004    |
| Pseudo R <sup>2</sup>                                     | 0.31            |         | 0.32            |         | 0.28            |         | 0.33                 |         |

Source: Understanding Society waves 2–4. Note: n=117. There are no women who work in a small part-time job in wave 2 in this sample.

**Table A2–8: logistic regression of the likelihood of reducing working hours on use of flexible work – only first child**

|                                                     | Flexible work |         | Flexitime   |         | Telework    |         | Flexitime & Telework |         |
|-----------------------------------------------------|---------------|---------|-------------|---------|-------------|---------|----------------------|---------|
|                                                     | Coefficient   | p-value | Coefficient | p-value | Coefficient | p-value | Coefficient          | p-value |
| Constant                                            | 6.55          | .116    | 7.35        | .077    | 6.25        | .129    | 7.97                 | .069    |
| <i>Main variables</i>                               |               |         |             |         |             |         |                      |         |
| No use flexible work/flexitime in either wave (ref) |               |         |             |         |             |         |                      |         |
| Use flexible work/flexitime in wave 4 only          | -3.53         | .022    | –           | –       |             |         | –                    | –       |
| Use flexible work/flexitime in wave 2 only          | 0.10          | .926    | -0.07       | .943    |             |         | -0.29                | .792    |
| Use flexible work/flexitime in both waves           | -1.60         | .025    | -2.09       | .009    |             |         | -2.44                | .010    |
| No use telework in either wave (ref)                |               |         |             |         |             |         |                      |         |
| Use telework in wave 4 only                         |               |         |             |         | -1.75       | .245    | -1.17                | .516    |
| Use telework in wave 2 only                         |               |         |             |         | –           | –       | –                    | –       |
| Use telework in both waves                          |               |         |             |         | -0.34       | .790    | 0.70                 | .631    |
| <i>Control variables</i>                            |               |         |             |         |             |         |                      |         |
| Works small part-time (<16 hours/week) wave 2       | –             | –       | –           | –       | –           | –       | –                    | –       |
| Works large part-time (16–34 hours/week) wave 2     | -1.77         | .028    | -1.61       | .044    | -1.10       | .151    | -1.39                | .085    |
| Works full-time (35–47 hours/week) wave 2 (ref)     |               |         |             |         |             |         |                      |         |
| Works long hours (48 hours/week or more) wave 2     | 5.37          | .012    | 4.81        | .040    | 5.10        | .016    | 5.02                 | .031    |
| Age wave 4                                          | -0.12         | .105    | -0.09       | .247    | -0.12       | .090    | -0.07                | .366    |
| Age youngest child                                  |               |         |             |         |             |         |                      |         |
| 0 wave 4 (ref)                                      |               |         |             |         |             |         |                      |         |
| 1 wave 4                                            | 1.70          | .029    | 1.92        | .014    | 1.58        | .034    | 1.80                 | .023    |
| 2 wave 4                                            | 3.64          | .039    | 4.02        | .027    | 3.30        | .041    | 4.12                 | .028    |
| Gender attitude wave 2                              | 0.06          | .895    | 0.09        | .840    | 0.00        | .991    | 0.21                 | .635    |
| Having a degree wave 4                              | -0.90         | .251    | -0.77       | .320    | -1.00       | .193    | -0.60                | .468    |
| Working in private sector wave 4                    | 0.70          | .292    | 0.53        | .430    | 0.99        | .127    | 0.67                 | .345    |
| Union present wave 4                                | -0.65         | .361    | -0.62       | .369    | -0.30       | .650    | -0.44                | .534    |
| Occupational level wave 4                           |               |         |             |         |             |         |                      |         |
| Management / professional (ref)                     |               |         |             |         |             |         |                      |         |
| Skilled work                                        | -0.49         | .578    | -0.32       | .709    | 0.02        | .983    | -0.20                | .825    |
| Partly skilled or unskilled work                    | -0.38         | .730    | -0.07       | .948    | 0.01        | .996    | -0.04                | .968    |
| Log corrected wage wave 4                           | 0.02          | .982    | -0.06       | .944    | 0.44        | .581    | -0.21                | .799    |
| Living with partner wave 4                          | -4.50         | .025    | -4.88       | .019    | -4.08       | .039    | -5.12                | .018    |
| Partner employed wave 4                             | 5.06          | .002    | 4.77        | .005    | 4.39        | .005    | 4.84                 | .005    |
| Partner self-employed wave 4                        | 4.13          | .022    | 3.23        | .065    | 3.12        | .064    | 3.18                 | .077    |
| Partner work hours wave 4                           | 0.00          | .964    | -0.02       | .546    | 0.01        | .864    | -0.02                | .667    |
| Partner log earnings wave 4                         | -0.17         | .727    | -0.22       | .627    | -0.45       | .350    | -0.35                | .485    |
| Partner uses flexible work wave 4                   | -2.06         | .007    | -1.97       | .010    | -1.99       | .007    | -1.77                | .022    |
| Pseudo R <sup>2</sup>                               | 0.33          |         | 0.30        |         | 0.27        |         | 0.32                 |         |

*Source:* Understanding Society waves 2–4. *Note:* n=117 for flexible work; 115 for flexitime as only two observations exist for flexitime in wave 4 only; 114 for telework as only three observation exists for telework in wave 2 only, 112 for flexitime and telework. There are no women who work in a small part-time job in wave 2 in this sample.

### **Appendix 3: Robustness checks**

A variety of robustness checks are also performed in this paper. Specifically, we first did a Heckman selection model for the reduction of working hours, as this may not be an independent analysis from whether someone is still employed. Second, we multiple imputed the data to deal with missing data to see to what degree our results were biased due to missing data. The main analyses presented in this paper are based on respondents without any missing data on any of the variables included in this study. To see to what degree this mattered for our results, we did a robustness check where we multiple imputed the missing data. Third, we used robust standard errors to get an idea to what degree misspecification of our model mattered for the results. Fourth, we identified influential cases and performed the analyses without these cases to see whether our main conclusions were due to a few influential cases. Fifth, we looked at what happened if we controlled for whether someone was still in the same job (versus having changed job). In our main analysis it could be that people gained access to flexible work or reduced their hours by changing jobs. By controlling for whether the person was still in the same job we assess what the impact of this is for our conclusions. Sixth, we looked at a reduction in contractual working hours instead of actual working hours (contractual + overtime) as presented in the main body of the text. Seventh, we assess whether it mattered for our results that there was a cut-off of 70 hours/week for working hours. Eighth, we assessed whether only having access to flexible work/flexitime/telework but not using this flexibility as reference category (rather than also having included in the reference category no access and no use) mattered for our results. Finally, we assessed various definitions of reduction of working hours (next to the more than 4 hours/week presented in this paper we also looked at any reduction, more than 8 hours/week, and more than 10% per week).

### **3.1 Heckman selection model**

In the paper we presented separate analyses for employment and reduction of working hours. However, reduction of working hours is dependent on still being employed in wave 4. As such, it may be incorrect to treat them as independent equations. Hence, we used a Heckman selection model to assess the impact of this decision.

In separate bivariate analyses we looked at which variables predicted employment but not a reduction in working hours. We decided to use whether someone was working in the private sector, whether there was a union present, and corrected wage in wave 2 for the prediction of employment only. We performed probit models with sample selection to see whether employment and reduction of working hours are independent equations. As age of youngest child does not run for people with a child aged 2 for the equations of employment (also see main paper), we collapsed this category with people with the youngest child aged 1. Hence, this variable is now dichotomous (youngest child aged 0 / youngest child aged 1 or 2). Because the variables explaining employment and not reduction of working hours were not always significant in the complete model, we opted for adding another selection variable. In the full model, the age of the youngest child (now dichotomous) was significantly related to being employed, but not to reduction of working hours. Hence, we used this as an additional selection variable.

The selection models did not run for all models for a subsample of only individuals with one child in the household, hence we do this only for the full sample. As can be seen underneath the following tables, the p-value for the LR test for independent equations is around .050 and is thus borderline significant (range p-values: .029–.063). There does not appear to be strong evidence against the hypothesis that they are independent equations, but they might be dependent. When we compare the results for our variables of interest we see that when explaining reduction of hours by flexitime and telework for the full sample,



it is less obvious that (perceived) access to telework negatively affects reduction of hours, with a p-value of .052 if this is available in both waves. The use of flexitime remains highly significantly related to a decreased likelihood of reducing working hours ( $p=.001$  in full model also including use of telework). Hence, there is more evidence for the usefulness of flexitime than for (perceived) access to telework.

**Table A3–1: flexible work**

|                                                    | Coefficient | p-value |
|----------------------------------------------------|-------------|---------|
| <i>REDUCTION WORKING HOURS WAVE 4</i>              |             |         |
| Constant                                           | 2.64        | .005    |
| <i>Main variable</i>                               |             |         |
| No access to working flexibly in either wave (ref) |             |         |
| Access to working flexibly in wave 4 only          | –0.26       | .303    |
| Access to working flexibly in wave 2 only          | –0.16       | .528    |
| Access to working flexibly in both waves           | –0.35       | .069    |
| <i>Control variables</i>                           |             |         |
| Works small part-time (<16 hours/week) wave 2      | –0.87       | .071    |
| Works large part-time (16–34 hours/week) wave 2    | –0.75       | <.001   |
| Works full-time (35–47 hours/week) wave 2 (ref)    |             |         |
| Works long hours (48 hours/week or more) wave 2    | 0.80        | .047    |
| Age wave 4                                         | –0.01       | .545    |
| Total number of children in household              |             |         |
| 1 wave 4 (ref)                                     |             |         |
| 2 wave 4                                           | –0.75       | <.001   |
| 3 or more wave 4                                   | –0.54       | .046    |
| Gender attitude wave 2                             | –0.17       | .076    |
| Having a degree wave 4                             | –0.26       | .207    |
| Occupational level wave 4                          |             |         |
| Management / professional (ref)                    |             |         |
| Skilled work                                       | –0.34       | .120    |
| Partly skilled or unskilled work                   | 0.08        | .773    |
| Living with partner wave 4                         | –1.95       | <.001   |
| Partner employed wave 4                            | 1.32        | .007    |
| Partner self-employed wave 4                       | 1.46        | .009    |
| Partner work hours wave 4                          | 0.00        | .634    |
| Partner log earnings wave 4                        | –0.05       | .565    |
| Partner uses flexible work wave 4                  | –0.31       | .122    |
| <i>EMPLOYED WAVE 4</i>                             |             |         |
| Constant                                           | 0.98        | .421    |
| <i>Main variables</i>                              |             |         |
| Access to flexible work wave 2                     | 0.12        | .513    |
| <i>Control variables</i>                           |             |         |
| Age wave 4                                         | 0.03        | .165    |
| Age youngest child                                 |             |         |
| 0 wave 4 (ref)                                     |             |         |
| 1 or 2 wave 4                                      | 0.62        | .001    |
| Total number of children in household              |             |         |
| 1 wave 4 (ref)                                     |             |         |
| 2 wave 4                                           | 0.12        | .609    |
| 3 or more wave 4                                   | –0.34       | .214    |
| Gender attitude wave 2                             | 0.24        | .009    |
| Having a degree wave 4                             | –0.06       | .783    |
| Works small part-time (<16 hours/week) wave 2      | –0.57       | .089    |
| Works large part-time (16–34 hours/week) wave 2    | 0.17        | .463    |
| Works full-time (35–47 hours/week) wave 2 (ref)    |             |         |
| Works long hours (48 hours/week or more) wave 2    | 0.01        | .988    |
| Working in private sector wave 2                   | –0.37       | .106    |
| Union present wave 2                               | 0.28        | .184    |
| Occupational level wave 2                          |             |         |
| Management / professional (ref)                    |             |         |
| Skilled work                                       | 0.08        | .750    |
| Partly skilled or unskilled work                   | –0.48       | .107    |
| Log corrected wage wave 2                          | –0.05       | .799    |
| Living with partner wave 4                         | 0.07        | .871    |
| Partner employed wave 4                            | 0.22        | .560    |
| Partner self-employed wave 4                       | 0.37        | .459    |
| Partner work hours wave 4                          | –0.01       | .201    |
| Partner log earnings wave 4                        | –0.11       | .449    |
| Partner uses flexible work wave 4                  | 0.36        | .142    |
| /athrho                                            | –1.22       | .136    |
| Rho                                                | –0.84       |         |

LR test of independent equations (rho=0):  $\chi^2(1)=4.09$ ,  $p=.043$ .

Source: Understanding Society waves 2–4. Note: n=346

**Table A3–2: flexitime**

|                                                 | Coefficient | p-value |
|-------------------------------------------------|-------------|---------|
| <i>REDUCTION WORKING HOURS WAVE 4</i>           |             |         |
| Constant                                        | 2.58        | .006    |
| <i>Main variable</i>                            |             |         |
| No access to flexitime in either wave (ref)     |             |         |
| Access to flexitime in wave 4 only              | –0.02       | .937    |
| Access to flexitime in wave 2 only              | –0.08       | .733    |
| Access to flexitime in both waves               | –0.28       | .161    |
| <i>Control variables</i>                        |             |         |
| Works small part-time (<16 hours/week) wave 2   | –0.84       | .067    |
| Works large part-time (16–34 hours/week) wave 2 | –0.73       | <.001   |
| Works full-time (35–47 hours/week) wave 2 (ref) |             |         |
| Works long hours (48 hours/week or more) wave 2 | 0.76        | .058    |
| Age wave 4                                      | –0.01       | .566    |
| Total number of children in household           |             |         |
| 1 wave 4 (ref)                                  |             |         |
| 2 wave 4                                        | –0.75       | <.001   |
| 3 or more wave 4                                | –0.54       | .044    |
| Gender attitude wave 2                          | –0.17       | .073    |
| Having a degree wave 4                          | –0.27       | .194    |
| Occupational level wave 4                       |             |         |
| Management / professional (ref)                 |             |         |
| Skilled work                                    | –0.35       | .105    |
| Partly skilled or unskilled work                | 0.09        | .737    |
| Living with partner wave 4                      | –1.90       | <.001   |
| Partner employed wave 4                         | 1.27        | .008    |
| Partner self-employed wave 4                    | 1.39        | .010    |
| Partner work hours wave 4                       | 0.00        | .729    |
| Partner log earnings wave 4                     | –0.05       | .557    |
| Partner uses flexible work wave 4               | –0.32       | .111    |
| <i>EMPLOYED WAVE 4</i>                          |             |         |
| Constant                                        | 0.95        | .438    |
| <i>Main variables</i>                           |             |         |
| Access to flexitime wave 2                      | 0.16        | .372    |
| <i>Control variables</i>                        |             |         |
| Age wave 4                                      | 0.03        | .175    |
| Age youngest child                              |             |         |
| 0 wave 4 (ref)                                  |             |         |
| 1 or 2 wave 4                                   | 0.64        | .001    |
| Total number of children in household           |             |         |
| 1 wave 4 (ref)                                  |             |         |
| 2 wave 4                                        | 0.11        | .615    |
| 3 or more wave 4                                | –0.33       | .222    |
| Gender attitude wave 2                          | 0.24        | .008    |
| Having a degree wave 4                          | –0.07       | .731    |
| Works small part-time (<16 hours/week) wave 2   | –0.56       | .094    |
| Works large part-time (16–34 hours/week) wave 2 | 0.17        | .450    |
| Works full-time (35–47 hours/week) wave 2 (ref) |             |         |
| Works long hours (48 hours/week or more) wave 2 | 0.01        | .973    |
| Working in private sector wave 2                | –0.38       | .092    |
| Union present wave 2                            | 0.27        | .195    |
| Occupational level wave 2                       |             |         |
| Management / professional (ref)                 |             |         |
| Skilled work                                    | 0.07        | .772    |
| Partly skilled or unskilled work                | –0.50       | .094    |
| Log corrected wage wave 2                       | –0.05       | .811    |
| Living with partner wave 4                      | 0.06        | .874    |
| Partner employed wave 4                         | 0.22        | .556    |
| Partner self-employed wave 4                    | 0.38        | .441    |
| Partner work hours wave 4                       | –0.01       | .225    |
| Partner log earnings wave 4                     | –0.11       | .454    |
| Partner uses flexible work wave 4               | 0.35        | .148    |
| /athrho                                         | –1.19       | .069    |
| Rho                                             | –0.83       |         |

LR test of independent equations (rho=0):  $\chi^2(1)=4.76$ ,  $p=.029$ .

Source: Understanding Society waves 2–4. Note: n = 346

**Table A3–3: telework**

|                                                 | Coefficient | p-value |
|-------------------------------------------------|-------------|---------|
| <i>REDUCTION WORKING HOURS WAVE 4</i>           |             |         |
| Constant                                        | 2.41        | .009    |
| <i>Main variable</i>                            |             |         |
| No access to telework in either wave (ref)      |             |         |
| Access to telework in wave 4 only               | –0.66       | .033    |
| Access to telework in wave 2 only               | –0.31       | .482    |
| Access to telework in both waves                | –0.55       | .032    |
| <i>Control variables</i>                        |             |         |
| Works small part-time (<16 hours/week) wave 2   | –0.90       | .054    |
| Works large part-time (16–34 hours/week) wave 2 | –0.78       | <.001   |
| Works full-time (35–47 hours/week) wave 2 (ref) |             |         |
| Works long hours (48 hours/week or more) wave 2 | 0.86        | .033    |
| Age wave 4                                      | –0.01       | .568    |
| Total number of children in household           |             |         |
| 1 wave 4 (ref)                                  |             |         |
| 2 wave 4                                        | –0.79       | <.001   |
| 3 or more wave 4                                | –0.48       | .081    |
| Gender attitude wave 2                          | –0.16       | .088    |
| Having a degree wave 4                          | –0.22       | .285    |
| Occupational level wave 4                       |             |         |
| Management / professional (ref)                 |             |         |
| Skilled work                                    | –0.38       | .078    |
| Partly skilled or unskilled work                | 0.06        | .836    |
| Living with partner wave 4                      | –2.02       | <.001   |
| Partner employed wave 4                         | 1.39        | .005    |
| Partner self-employed wave 4                    | 1.53        | .006    |
| Partner work hours wave 4                       | 0.00        | .758    |
| Partner log earnings wave 4                     | –0.02       | .792    |
| Partner uses flexible work wave 4               | –0.32       | .119    |
| <i>EMPLOYED WAVE 4</i>                          |             |         |
| Constant                                        | 1.11        | .365    |
| <i>Main variables</i>                           |             |         |
| Access to telework wave 2                       | 0.26        | .356    |
| <i>Control variables</i>                        |             |         |
| Age wave 4                                      | 0.03        | .173    |
| Age youngest child                              |             |         |
| 0 wave 4 (ref)                                  |             |         |
| 1 or 2 wave 4                                   | 0.64        | .001    |
| Total number of children in household           |             |         |
| 1 wave 4 (ref)                                  |             |         |
| 2 wave 4                                        | 0.14        | .542    |
| 3 or more wave 4                                | –0.34       | .210    |
| Gender attitude wave 2                          | 0.25        | .008    |
| Having a degree wave 4                          | –0.09       | .662    |
| Works small part-time (<16 hours/week) wave 2   | –0.56       | .092    |
| Works large part-time (16–34 hours/week) wave 2 | 0.16        | .470    |
| Works full-time (35–47 hours/week) wave 2 (ref) |             |         |
| Works long hours (48 hours/week or more) wave 2 | 0.00        | .997    |
| Working in private sector wave 2                | –0.39       | .086    |
| Union present wave 2                            | 0.27        | .202    |
| Occupational level wave 2                       |             |         |
| Management / professional (ref)                 |             |         |
| Skilled work                                    | 0.09        | .724    |
| Partly skilled or unskilled work                | –0.48       | .110    |
| Log corrected wage wave 2                       | –0.07       | .752    |
| Living with partner wave 4                      | 0.06        | .888    |
| Partner employed wave 4                         | 0.21        | .560    |
| Partner self-employed wave 4                    | 0.33        | .502    |
| Partner work hours wave 4                       | –0.01       | .183    |
| Partner log earnings wave 4                     | –0.11       | .453    |
| Partner uses flexible work wave 4               | 0.37        | .127    |
| /athrho                                         | –1.16       | .081    |
| Rho                                             | –0.82       |         |

LR test of independent equations (rho=0):  $\chi^2(1)=3.90$ ,  $p=.048$ .

Source: Understanding Society waves 2–4. Note: n = 346

**Table A3–4: flexitime and telework**

|                                                 | Coefficient | p-value |
|-------------------------------------------------|-------------|---------|
| <i>REDUCTION WORKING HOURS WAVE 4</i>           |             |         |
| Constant                                        | 2.41        | .011    |
| <i>Main variable</i>                            |             |         |
| No access to flexitime in either wave (ref)     |             |         |
| Access to flexitime in wave 4 only              | -0.00       | 1.000   |
| Access to flexitime in wave 2 only              | 0.00        | .993    |
| Access to flexitime in both waves               | -0.02       | .940    |
| No access to telework in either wave (ref)      |             |         |
| Access to telework in wave 4 only               | -0.67       | .047    |
| Access to telework in wave 2 only               | -0.31       | .489    |
| Access to telework in both waves                | -0.54       | .052    |
| <i>Control variables</i>                        |             |         |
| Works small part-time (<16 hours/week) wave 2   | -0.90       | .054    |
| Works large part-time (16–34 hours/week) wave 2 | -0.78       | <.001   |
| Works full-time (35–47 hours/week) wave 2 (ref) |             |         |
| Works long hours (48 hours/week or more) wave 2 | 0.86        | .039    |
| Age wave 4                                      | -0.01       | .580    |
| Total number of children in household           |             |         |
| 1 wave 4 (ref)                                  |             |         |
| 2 wave 4                                        | -0.79       | <.001   |
| 3 or more wave 4                                | -0.48       | .082    |
| Gender attitude wave 2                          | -0.16       | .093    |
| Having a degree wave 4                          | -0.22       | .281    |
| Occupational level wave 4                       |             |         |
| Management / professional (ref)                 |             |         |
| Skilled work                                    | -0.38       | .078    |
| Partly skilled or unskilled work                | 0.06        | .827    |
| Living with partner wave 4                      | -2.02       | <.001   |
| Partner employed wave 4                         | 1.40        | .005    |
| Partner self-employed wave 4                    | 1.54        | .007    |
| Partner work hours wave 4                       | 0.00        | .770    |
| Partner log earnings wave 4                     | -0.03       | .786    |
| Partner uses flexible work wave 4               | -0.31       | .121    |
| <i>EMPLOYED WAVE 4</i>                          |             |         |
| Constant                                        | 1.00        | .418    |
| <i>Main variables</i>                           |             |         |
| Access to flexitime wave 2                      | 0.12        | .523    |
| Access to telework wave 2                       | 0.21        | .476    |
| <i>Control variables</i>                        |             |         |
| Age wave 4                                      | 0.03        | .176    |
| Age youngest child                              |             |         |
| 0 wave 4 (ref)                                  |             |         |
| 1 or 2 wave 4                                   | 0.64        | .001    |
| Total number of children in household           |             |         |
| 1 wave 4 (ref)                                  |             |         |
| 2 wave 4                                        | 0.13        | .575    |
| 3 or more wave 4                                | -0.35       | .198    |
| Gender attitude wave 2                          | 0.25        | .007    |
| Having a degree wave 4                          | -0.10       | .644    |
| Works small part-time (<16 hours/week) wave 2   | -0.55       | .099    |
| Works large part-time (16–34 hours/week) wave 2 | 0.17        | .444    |
| Works full-time (35–47 hours/week) wave 2 (ref) |             |         |
| Works long hours (48 hours/week or more) wave 2 | 0.02        | .963    |
| Working in private sector wave 2                | -0.40       | .084    |
| Union present wave 2                            | 0.26        | .224    |
| Occupational level wave 2                       |             |         |
| Management / professional (ref)                 |             |         |
| Skilled work                                    | 0.08        | .755    |
| Partly skilled or unskilled work                | -0.48       | .112    |
| Log corrected wage wave 2                       | -0.06       | .768    |
| Living with partner wave 4                      | 0.07        | .854    |
| Partner employed wave 4                         | 0.20        | .589    |
| Partner self-employed wave 4                    | 0.34        | .488    |
| Partner work hours wave 4                       | -0.01       | .209    |
| Partner log earnings wave 4                     | -0.10       | .474    |
| Partner uses flexible work wave 4               | 0.37        | .130    |
| /athrho                                         | -1.15       | .072    |
| Rho                                             | -0.82       |         |

LR test of independent equations (rho=0):  $\chi^2(1)=3.97$ ,  $p=.046$ .

Source: Understanding Society waves 2–4. Note: n = 346

**Table A3–5: use flexible work**

|                                                 | Coefficient | p-value |
|-------------------------------------------------|-------------|---------|
| <i>REDUCTION WORKING HOURS WAVE 4</i>           |             |         |
| Constant                                        | 2.93        | .003    |
| <i>Main variable</i>                            |             |         |
| Not using flexible work in either wave (ref)    |             |         |
| Uses flexible work in wave 4 only               | -1.07       | .002    |
| Uses flexible work in wave 2 only               | -0.40       | .160    |
| Uses flexible work in both waves                | -0.93       | .001    |
| <i>Control variables</i>                        |             |         |
| Works small part-time (<16 hours/week) wave 2   | -1.01       | .040    |
| Works large part-time (16–34 hours/week) wave 2 | -0.81       | <.001   |
| Works full-time (35–47 hours/week) wave 2 (ref) |             |         |
| Works long hours (48 hours/week or more) wave 2 | 0.89        | .028    |
| Age wave 4                                      | -0.02       | .340    |
| Total number of children in household           |             |         |
| 1 wave 4 (ref)                                  |             |         |
| 2 wave 4                                        | -0.79       | <.001   |
| 3 or more wave 4                                | -0.51       | .072    |
| Gender attitude wave 2                          | -0.15       | .125    |
| Having a degree wave 4                          | -0.25       | .244    |
| Occupational level wave 4                       |             |         |
| Management / professional (ref)                 |             |         |
| Skilled work                                    | -0.43       | .058    |
| Partly skilled or unskilled work                | -0.04       | .888    |
| Living with partner wave 4                      | -2.03       | <.001   |
| Partner employed wave 4                         | 1.42        | .005    |
| Partner self-employed wave 4                    | 1.65        | .004    |
| Partner work hours wave 4                       | 0.00        | .885    |
| Partner log earnings wave 4                     | -0.04       | .687    |
| Partner uses flexible work wave 4               | -0.27       | .191    |
| <i>EMPLOYED WAVE 4</i>                          |             |         |
| Constant                                        | 0.97        | .438    |
| <i>Main variables</i>                           |             |         |
| Uses flexible work wave 2                       | 0.30        | .209    |
| <i>Control variables</i>                        |             |         |
| Age wave 4                                      | 0.03        | .141    |
| Age youngest child                              |             |         |
| 0 wave 4 (ref)                                  |             |         |
| 1 or 2 wave 4                                   | 0.66        | <.001   |
| Total number of children in household           |             |         |
| 1 wave 4 (ref)                                  |             |         |
| 2 wave 4                                        | 0.16        | .482    |
| 3 or more wave 4                                | -0.35       | .200    |
| Gender attitude wave 2                          | 0.24        | .009    |
| Having a degree wave 4                          | -0.07       | .737    |
| Works small part-time (<16 hours/week) wave 2   | -0.59       | .077    |
| Works large part-time (16–34 hours/week) wave 2 | 0.12        | .591    |
| Works full-time (35–47 hours/week) wave 2 (ref) |             |         |
| Works long hours (48 hours/week or more) wave 2 | 0.00        | .993    |
| Working in private sector wave 2                | -0.40       | .080    |
| Union present wave 2                            | 0.30        | .166    |
| Occupational level wave 2                       |             |         |
| Management / professional (ref)                 |             |         |
| Skilled work                                    | 0.12        | .643    |
| Partly skilled or unskilled work                | -0.43       | .165    |
| Log corrected wage wave 2                       | -0.07       | .730    |
| Living with partner wave 4                      | 0.07        | .861    |
| Partner employed wave 4                         | 0.23        | .530    |
| Partner self-employed wave 4                    | 0.37        | .455    |
| Partner work hours wave 4                       | -0.01       | .203    |
| Partner log earnings wave 4                     | -0.11       | .457    |
| Partner uses flexible work wave 4               | 0.35        | .156    |
| /athrho                                         | -0.97       | .071    |
| Rho                                             | -0.75       |         |

LR test of independent equations (rho=0):  $\chi^2(1)=3.45$ ,  $p=.063$ .

Source: Understanding Society waves 2–4. Note: n = 346

**Table A3–6: use flexitime**

|                                                 | Coefficient | p-value |
|-------------------------------------------------|-------------|---------|
| <i>REDUCTION WORKING HOURS WAVE 4</i>           |             |         |
| Constant                                        | 2.70        | .005    |
| <i>Main variable</i>                            |             |         |
| Not using flexitime in either wave (ref)        |             |         |
| Uses flexitime in wave 4 only                   | –0.74       | .069    |
| Uses flexitime in wave 2 only                   | –0.23       | .455    |
| Uses flexitime in both waves                    | –1.26       | <.001   |
| <i>Control variables</i>                        |             |         |
| Works small part-time (<16 hours/week) wave 2   | –0.89       | .059    |
| Works large part-time (16–34 hours/week) wave 2 | –0.71       | .001    |
| Works full-time (35–47 hours/week) wave 2 (ref) |             |         |
| Works long hours (48 hours/week or more) wave 2 | 0.69        | .091    |
| Age wave 4                                      | –0.01       | .666    |
| Total number of children in household           |             |         |
| 1 wave 4 (ref)                                  |             |         |
| 2 wave 4                                        | –0.89       | <.001   |
| 3 or more wave 4                                | –0.67       | .017    |
| Gender attitude wave 2                          | –0.14       | .170    |
| Having a degree wave 4                          | –0.24       | .253    |
| Occupational level wave 4                       |             |         |
| Management / professional (ref)                 |             |         |
| Skilled work                                    | –0.38       | .093    |
| Partly skilled or unskilled work                | 0.02        | .939    |
| Living with partner wave 4                      | –2.03       | <.001   |
| Partner employed wave 4                         | 1.37        | .005    |
| Partner self-employed wave 4                    | 1.52        | .007    |
| Partner work hours wave 4                       | –0.00       | .982    |
| Partner log earnings wave 4                     | –0.05       | .630    |
| Partner uses flexible work wave 4               | –0.30       | .147    |
| <i>EMPLOYED WAVE 4</i>                          |             |         |
| Constant                                        | 1.04        | .410    |
| <i>Main variables</i>                           |             |         |
| Uses flexitime wave 2                           | 0.23        | .443    |
| <i>Control variables</i>                        |             |         |
| Age wave 4                                      | 0.03        | .172    |
| Age youngest child                              |             |         |
| 0 wave 4 (ref)                                  |             |         |
| 1 or 2 wave 4                                   | 0.65        | <.001   |
| Total number of children in household           |             |         |
| 1 wave 4 (ref)                                  |             |         |
| 2 wave 4                                        | 0.16        | .479    |
| 3 or more wave 4                                | –0.29       | .283    |
| Gender attitude wave 2                          | 0.24        | .011    |
| Having a degree wave 4                          | –0.07       | .754    |
| Works small part-time (<16 hours/week) wave 2   | –0.58       | .083    |
| Works large part-time (16–34 hours/week) wave 2 | 0.13        | .551    |
| Works full-time (35–47 hours/week) wave 2 (ref) |             |         |
| Works long hours (48 hours/week or more) wave 2 | 0.01        | .984    |
| Working in private sector wave 2                | –0.42       | .068    |
| Union present wave 2                            | 0.27        | .207    |
| Occupational level wave 2                       |             |         |
| Management / professional (ref)                 |             |         |
| Skilled work                                    | 0.11        | .663    |
| Partly skilled or unskilled work                | –0.47       | .120    |
| Log corrected wage wave 2                       | –0.07       | .746    |
| Living with partner wave 4                      | 0.06        | .881    |
| Partner employed wave 4                         | 0.23        | .529    |
| Partner self-employed wave 4                    | 0.39        | .427    |
| Partner work hours wave 4                       | –0.01       | .255    |
| Partner log earnings wave 4                     | –0.12       | .445    |
| Partner uses flexible work wave 4               | 0.37        | .132    |
| /athrho                                         | –0.96       | .055    |
| Rho                                             | –0.75       |         |

LR test of independent equations (rho=0):  $\chi^2(1)=4.07$ ,  $p=.044$ .

Source: Understanding Society waves 2–4. Note: n = 346

**Table A3–7: use telework**

|                                                 | Coefficient | p-value |
|-------------------------------------------------|-------------|---------|
| <i>REDUCTION WORKING HOURS WAVE 4</i>           |             |         |
| Constant                                        | 2.34        | .010    |
| <i>Main variable</i>                            |             |         |
| Not using telework in either wave (ref)         |             |         |
| Uses telework in wave 4 only                    | –0.81       | .071    |
| Uses telework in wave 2 only                    | –0.02       | .975    |
| Uses telework in both waves                     | –0.28       | .471    |
| <i>Control variables</i>                        |             |         |
| Works small part-time (<16 hours/week) wave 2   | –0.80       | .086    |
| Works large part-time (16–34 hours/week) wave 2 | –0.70       | <.001   |
| Works full-time (35–47 hours/week) wave 2 (ref) |             |         |
| Works long hours (48 hours/week or more) wave 2 | 0.92        | .022    |
| Age wave 4                                      | –0.01       | .485    |
| Total number of children in household           |             |         |
| 1 wave 4 (ref)                                  |             |         |
| 2 wave 4                                        | –0.78       | <.001   |
| 3 or more wave 4                                | –0.50       | .063    |
| Gender attitude wave 2                          | –0.16       | .091    |
| Having a degree wave 4                          | –0.25       | .227    |
| Occupational level wave 4                       |             |         |
| Management / professional (ref)                 |             |         |
| Skilled work                                    | –0.35       | .098    |
| Partly skilled or unskilled work                | 0.11        | .681    |
| Living with partner wave 4                      | –1.91       | <.001   |
| Partner employed wave 4                         | 1.30        | .008    |
| Partner self-employed wave 4                    | 1.46        | .009    |
| Partner work hours wave 4                       | 0.00        | .700    |
| Partner log earnings wave 4                     | –0.03       | .751    |
| Partner uses flexible work wave 4               | –0.32       | .110    |
| <i>EMPLOYED WAVE 4</i>                          |             |         |
| Constant                                        | 1.06        | .382    |
| <i>Main variables</i>                           |             |         |
| Uses telework wave 2                            | 0.47        | .231    |
| <i>Control variables</i>                        |             |         |
| Age wave 4                                      | 0.03        | .138    |
| Age youngest child                              |             |         |
| 0 wave 4 (ref)                                  |             |         |
| 1 or 2 wave 4                                   | 0.64        | .001    |
| Total number of children in household           |             |         |
| 1 wave 4 (ref)                                  |             |         |
| 2 wave 4                                        | 0.14        | .522    |
| 3 or more wave 4                                | –0.38       | .170    |
| Gender attitude wave 2                          | 0.26        | .006    |
| Having a degree wave 4                          | –0.07       | .740    |
| Works small part-time (<16 hours/week) wave 2   | –0.56       | .090    |
| Works large part-time (16–34 hours/week) wave 2 | 0.16        | .491    |
| Works full-time (35–47 hours/week) wave 2 (ref) |             |         |
| Works long hours (48 hours/week or more) wave 2 | –0.03       | .939    |
| Working in private sector wave 2                | –0.38       | .098    |
| Union present wave 2                            | 0.28        | .170    |
| Occupational level wave 2                       |             |         |
| Management / professional (ref)                 |             |         |
| Skilled work                                    | 0.09        | .721    |
| Partly skilled or unskilled work                | –0.46       | .124    |
| Log corrected wage wave 2                       | –0.08       | .722    |
| Living with partner wave 4                      | 0.04        | .915    |
| Partner employed wave 4                         | 0.24        | .507    |
| Partner self-employed wave 4                    | 0.34        | .489    |
| Partner work hours wave 4                       | –0.02       | .155    |
| Partner log earnings wave 4                     | –0.11       | .447    |
| Partner uses flexible work wave 4               | 0.34        | .162    |
| /athrho                                         | –1.22       | .107    |
| Rho                                             | –0.84       |         |

LR test of independent equations (rho=0):  $\chi^2(1)=3.72$ ,  $p=.054$ .

Source: Understanding Society waves 2–4. Note: n = 346



**Table A3–8: use flexitime and telework**

|                                                 | Coefficient | p-value |
|-------------------------------------------------|-------------|---------|
| <i>REDUCTION WORKING HOURS WAVE 4</i>           |             |         |
| Constant                                        | 2.74        | .004    |
| <i>Main variable</i>                            |             |         |
| Not using flexitime in either wave (ref)        |             |         |
| Uses flexitime in wave 4 only                   | -0.71       | .101    |
| Uses flexitime in wave 2 only                   | -0.22       | .478    |
| Uses flexitime in both waves                    | -1.27       | .001    |
| <i>Not using telework in either wave (ref)</i>  |             |         |
| Uses telework in wave 4 only                    | -0.54       | .330    |
| Uses telework in wave 2 only                    | 0.23        | .731    |
| Uses telework in both waves                     | 0.12        | .762    |
| <i>Control variables</i>                        |             |         |
| Works small part-time (<16 hours/week) wave 2   | -0.87       | .066    |
| Works large part-time (16–34 hours/week) wave 2 | -0.70       | .001    |
| Works full-time (35–47 hours/week) wave 2 (ref) |             |         |
| Works long hours (48 hours/week or more) wave 2 | 0.70        | .090    |
| Age wave 4                                      | -0.01       | .633    |
| <i>Total number of children in household</i>    |             |         |
| 1 wave 4 (ref)                                  |             |         |
| 2 wave 4                                        | -0.90       | <.001   |
| 3 or more wave 4                                | -0.69       | .016    |
| Gender attitude wave 2                          | -0.13       | .193    |
| Having a degree wave 4                          | -0.23       | .277    |
| <i>Occupational level wave 4</i>                |             |         |
| Management / professional (ref)                 |             |         |
| Skilled work                                    | -0.38       | .094    |
| Partly skilled or unskilled work                | 0.02        | .935    |
| Living with partner wave 4                      | -2.04       | <.001   |
| Partner employed wave 4                         | 1.39        | .005    |
| Partner self-employed wave 4                    | 1.54        | .006    |
| Partner work hours wave 4                       | -0.00       | .959    |
| Partner log earnings wave 4                     | -0.05       | .629    |
| Partner uses flexible work wave 4               | -0.31       | .146    |
| <i>EMPLOYED WAVE 4</i>                          |             |         |
| Constant                                        | 1.03        | .418    |
| <i>Main variables</i>                           |             |         |
| Uses flexitime wave 2                           | 0.20        | .512    |
| Uses telework wave 2                            | 0.16        | .593    |
| <i>Control variables</i>                        |             |         |
| Age wave 4                                      | 0.03        | .161    |
| <i>Age youngest child</i>                       |             |         |
| 0 wave 4 (ref)                                  |             |         |
| 1 or 2 wave 4                                   | 0.66        | <.001   |
| <i>Total number of children in household</i>    |             |         |
| 1 wave 4 (ref)                                  |             |         |
| 2 wave 4                                        | 0.16        | .484    |
| 3 or more wave 4                                | -0.32       | .242    |
| Gender attitude wave 2                          | 0.24        | .010    |
| Having a degree wave 4                          | -0.08       | .708    |
| Works small part-time (<16 hours/week) wave 2   | -0.56       | .092    |
| Works large part-time (16–34 hours/week) wave 2 | 0.14        | .534    |
| Works full-time (35–47 hours/week) wave 2 (ref) |             |         |
| Works long hours (48 hours/week or more) wave 2 | 0.01        | .976    |
| Working in private sector wave 2                | -0.42       | .068    |
| Union present wave 2                            | 0.28        | .197    |
| <i>Occupational level wave 2</i>                |             |         |
| Management / professional (ref)                 |             |         |
| Skilled work                                    | 0.12        | .629    |
| Partly skilled or unskilled work                | -0.45       | .140    |
| Log corrected wage wave 2                       | -0.08       | .706    |
| Living with partner wave 4                      | 0.06        | .877    |
| Partner employed wave 4                         | 0.22        | .552    |
| Partner self-employed wave 4                    | 0.37        | .452    |
| Partner work hours wave 4                       | -0.01       | .238    |
| Partner log earnings wave 4                     | -0.11       | .478    |
| Partner uses flexible work wave 4               | 0.36        | .140    |
| /athrho                                         | -1.00       | .072    |
| Rho                                             | -0.76       |         |

LR test of independent equations (rho=0):  $\chi^2(1)=3.61$ ,  $p=.057$ .

Source: Understanding Society waves 2–4. Note: n = 346

### 3.2 Multiple Imputation

As a second robustness check we wanted to see the influence of missing data. Hence we multiply imputed the data. As can be seen from the paper, there is quite some missing data. Hence, it is important to see how this impacts the results. The tables on the following pages give the results over 100 imputed datasets. Again, we focus our attention to our variables of interest. Conclusions pertaining to likelihood of being employed did not change. Regarding (perceived) access to telework, the results for only in wave 4 having access to this are not significant at the conventional significance level ( $p=.066$ ), again showing less stability for the results for (perceived) access to telework. Use of telework in wave 4 is now significantly negatively related to reduction of hours, but this effect disappears again in the full model also including flexitime. (Perceived) Access to flexitime is also no longer significant for the mothers of one child only in the full model also including telework ( $p=.080$ ). Actual use of flexitime remains significant both in the full model and for mothers of one child only.

Although not directly related to our hypotheses, it is also important to note that whether the partner works flexibly is no longer significant in the prediction of reduction of working hours for mothers of one child only.

#### *Note on imputation:*

The syntax for imputation used is:

```
mi impute chained (logit) private1 unionpresent1 perfpay1 degree2 ///
    parttimework1 workhome1 flexibletime1 ///
    (logit, condition(if workhome1==1) omit(loghourlywage1 i.agechy_dv2 sp_workhourstotal2 ///
        i.useworkhome2 i.useflexibletime2 i.workhome2 i.livepartner2 ///
        i.employed2 i.parttimework1 i.workhome1 i.catworkhours_long1 ///
        i.occsz1 i.sp_workhome2 i.sp_useworkhome2)) useworkhome1 ///
    (logit, condition(if flexibletime1==1) omit(i.flexibletime1)) useflexibletime1 ///
    (logit, condition(if livepartner2==1) omit(i.livepartner2)) sp_employed2 ///
    (logit, condition(if livepartner2==1 & sp_employed2==0) ///
```

```

omit(i.sp_employed2 i.livepartner2 i.sp_workhome2 i.sp_flexibletime2 i.sp_parttimework2
///
i.useworkhome1 i.sp_useflexibletime2 sp_workhourstotal2 i.workhome2)) ///
sp_selfemployed2 ///
(logit, condition(if livepartner2==1 & sp_employed2==1) ///
omit(i.sp_employed2 i.livepartner2 i.sp_selfemployed2)) ///
sp_workhome2 sp_flexibletime2 sp_parttimework2 ///
(logit, condition(if livepartner2==1 & sp_employed2==1 & sp_flexibletime2==1) ///
omit(i.sp_employed2 i.sp_flexibletime2 i.sp_selfemployed2 i.livepartner2)) ///
sp_useflexibletime2 ///
(logit, condition(if livepartner2==1 & sp_employed2==1 & sp_workhome2==1 & sp_selfemployed2==0) ///
omit(i.livepartner2 i.sp_employed2 i.sp_workhome2 loghourlywage1 i.sp_selfemployed2
///
sp_workhourstotal2 i.parttimework1 i.agechy_dv2 i.sp_flexibletime2 ///
i.useflexibletime2 i.catworkhours_long1 i.useworkhome1 i.workhome2 i.useworkhome2))
///
sp_useworkhome2 ///
truncreg, condition(if livepartner2==1 & (sp_employed2==1 | sp_selfemployed==1)) ///
omit(i.sp_employed2 i.sp_selfemployed i.livepartner2) ll(0)) ///
sp_logearnings2 ///
(logit, condition(if employed2==1) omit(i.employed2)) ///
reduced2 workhome2 flexibletime2 notsamejob2 ///
(logit, condition(if employed2==1 & workhome2==1) omit(i.employed2 i.workhome2 ///
i.useflexibletime2 i.sp_selfemployed2 i.parttimework1 i.degree2 i.sp_employed2 ///
i.useflexibletime1 i.agechy_dv2 i.livepartner2 i.catworkhours_long1)) ///
useworkhome2 ///
(logit, condition(if employed2==1 & flexibletime2==1) omit(i.employed2 i.flexibletime2)) ///
useflexibletime2 ///
(reg) genderatt1 ///
(ologit) occsize1 occlevel1 catworkhours_long1 ///
(truncreg, ll(0)) loghourlywage1 ///
(reg, condition(if livepartner2==1) ///
omit(i.livepartner2)) sp_workhourstotal2 ///
= i.employed2 i.livepartner2 i.totchildren2 dvage2 i.agechy_dv2 ///
, orderasis add(100) double dots augment //noisily

mi passive: replace flexiblework1 = 1 if (flexibletime1==1 | workhome1==1) & flexiblework1==.
mi passive: replace flexiblework1 = 1 if flexibletime1==0 & workhome1==0 & flexiblework1==.
mi passive: replace useflexiblework1 = 1 if (useflexibletime1==1 | useworkhome1==1) &
useflexiblework1==.
mi passive: replace useflexiblework1 = 0 if (useflexibletime1==0 & useworkhome1==0) &
useflexiblework1==.
mi passive: replace sp_useflexiblework2 = 1 if (sp_useflexibletime2==1 | sp_useworkhome2==1) &
sp_useflexiblework2==.

```

```

mi passive: replace sp_useflexiblework2 = 0 if sp_useflexibletime2==0 & sp_useworkhome2==0 &
sp_useflexiblework2==.
mi passive: replace flexiblework1 = 1 if (flexibletime1==1 | workhome1==1) & flexiblework1==.
mi passive: replace flexiblework1 = 1 if flexibletime1==0 & workhome1==0 & flexiblework1==.
mi passive: replace parttime = 0 if catworkhours_long1>2 & catworkhours_long1!=. & parttime==.
mi passive: replace parttime = 1 if catworkhours_long1<3 & parttime==.

mi passive: replace flexiblework2 = 1 if (flexibletime2==1 | workhome2==1) & flexiblework2==.
mi passive: replace flexiblework2 = 1 if flexibletime2==0 & workhome2==0 & flexiblework2==.
mi passive: replace useflexiblework2 = 1 if (useflexibletime2==1 | useworkhome2==1) &
useflexiblework2==.
mi passive: replace useflexiblework2 = 0 if (useflexibletime2==0 & useworkhome2==0) &
useflexiblework2==.

mi passive: replace combflexiblework1 = 0 if flexiblework1==0 & flexiblework2==0 & combflexiblework1==.
mi passive: replace combflexiblework1 = 1 if flexiblework1==0 & flexiblework2==1 & combflexiblework1==.
mi passive: replace combflexiblework1 = 2 if flexiblework1==1 & flexiblework2==0 & combflexiblework1==.
mi passive: replace combflexiblework1 = 3 if flexiblework1==1 & flexiblework2==1 & combflexiblework1==.
mi passive: replace combuseflexiblework1 = 0 if useflexiblework1==0 & useflexiblework2==0 &
combuseflexiblework1==.
mi passive: replace combuseflexiblework1 = 1 if useflexiblework1==0 & useflexiblework2==1 &
combuseflexiblework1==.
mi passive: replace combuseflexiblework1 = 2 if useflexiblework1==1 & useflexiblework2==0 &
combuseflexiblework1==.
mi passive: replace combuseflexiblework1 = 3 if useflexiblework1==1 & useflexiblework2==1 &
combuseflexiblework1==.

mi passive: replace combflexibletime1 = 0 if flexibletime1==0 & flexibletime2==0 & combflexibletime1==.
mi passive: replace combflexibletime1 = 1 if flexibletime1==0 & flexibletime2==1 & combflexibletime1==.
mi passive: replace combflexibletime1 = 2 if flexibletime1==1 & flexibletime2==0 & combflexibletime1==.
mi passive: replace combflexibletime1 = 3 if flexibletime1==1 & flexibletime2==1 & combflexibletime1==.
mi passive: replace combflexibleplace1 = 0 if workhome1==0 & workhome2==0 & combflexibleplace1==.
mi passive: replace combflexibleplace1 = 1 if workhome1==0 & workhome2==1 & combflexibleplace1==.
mi passive: replace combflexibleplace1 = 2 if workhome1==1 & workhome2==0 & combflexibleplace1==.
mi passive: replace combflexibleplace1 = 3 if workhome1==1 & workhome2==1 & combflexibleplace1==.
mi passive: replace combuseflexibletime1 = 0 if useflexibletime1==0 & useflexibletime2==0 &
combuseflexibletime1==.
mi passive: replace combuseflexibletime1 = 1 if useflexibletime1==0 & useflexibletime2==1 &
combuseflexibletime1==.
mi passive: replace combuseflexibletime1 = 2 if useflexibletime1==1 & useflexibletime2==0 &
combuseflexibletime1==.
mi passive: replace combuseflexibletime1 = 3 if useflexibletime1==1 & useflexibletime2==1 &
combuseflexibletime1==.
mi passive: replace combuseflexibleplace1 = 0 if useworkhome1==0 & useworkhome2==0 &
combuseflexibleplace1==.

```

```

mi passive: replace combuseflexibleplace1 = 1 if useworkhome1==0 & useworkhome2==1 &
combuseflexibleplace1==.
mi passive: replace combuseflexibleplace1 = 2 if useworkhome1==1 & useworkhome2==0 &
combuseflexibleplace1==.
mi passive: replace combuseflexibleplace1 = 3 if useworkhome1==1 & useworkhome2==1 &
combuseflexibleplace1==.

mi register passive sp_workhourstotal2
mi passive: replace sp_workhourstotal2 = missp_sp_workhourstotal2 if sp_employed2==0 &
sp_selfemployed2==0 & livepartner2==1
mi passive: replace sp_workhourstotal2 = missp_sp_workhourstotal2 if livepartner2==0
mi passive: replace sp_workhourstotal2 = 70 if sp_workhourstotal2>70 & sp_workhourstotal2!=.
mi passive: replace sp_workhourstotal2 = 1 if sp_workhourstotal2<1

```

For the working hours of the partner (`sp_workhourstotal2`), it was not possible to impute on the condition of being employed or self-employed, which was added passively afterwards. By making this variable passive, one person was made missing again, and deleted from the analyses.

**Table A3–9: logistic regression of the likelihood of being employed on (perceived) access to flexible work**

|                                                 | Flexible work |         | Flexitime   |         | Telework    |         | Flexitime & Telework |         |
|-------------------------------------------------|---------------|---------|-------------|---------|-------------|---------|----------------------|---------|
|                                                 | Coefficient   | p-value | Coefficient | p-value | Coefficient | p-value | Coefficient          | p-value |
| Constant                                        | 3.74          | .073    | 3.73        | .074    | 3.96        | .062    | 3.97                 | .062    |
| <i>Main variables</i>                           |               |         |             |         |             |         |                      |         |
| Access to flexible work/flexitime wave 2        | 0.06          | .818    | 0.07        | .812    |             |         | –0.01                | .977    |
| Access to telework wave 2                       |               |         |             |         | 0.42        | .364    | 0.42                 | .379    |
| <i>Control variables</i>                        |               |         |             |         |             |         |                      |         |
| Age wave 4                                      | 0.04          | .162    | 0.04        | .162    | 0.04        | .157    | 0.04                 | .157    |
| Age youngest child                              |               |         |             |         |             |         |                      |         |
| 0 wave 4 (ref)                                  |               |         |             |         |             |         |                      |         |
| 1 wave 4                                        | 1.00          | <.001   | 1.00        | <.001   | 1.03        | <.001   | 1.03                 | <.001   |
| Total number of children in household           |               |         |             |         |             |         |                      |         |
| 1 wave 4 (ref)                                  |               |         |             |         |             |         |                      |         |
| 2 wave 4                                        | 0.31          | .352    | 0.31        | .347    | 0.31        | .345    | 0.31                 | .345    |
| 3 or more wave 4                                | –0.14         | .727    | –0.13       | .739    | –0.17       | .666    | –0.17                | .666    |
| Gender attitude wave 2                          | 0.50          | <.001   | 0.50        | <.001   | 0.51        | <.001   | 0.51                 | <.001   |
| Having a degree wave 4                          | –0.12         | .690    | –0.11       | .694    | –0.14       | .623    | –0.14                | .623    |
| Works small part-time (<16 hours/week) wave 2   | –0.90         | .058    | –0.90       | .058    | –0.89       | .062    | –0.89                | .062    |
| Works large part-time (16–34 hours/week) wave 2 | –0.16         | .625    | –0.15       | .629    | –0.14       | .656    | –0.14                | .655    |
| Works full-time (35–47 hours/week) wave 2 (ref) |               |         |             |         |             |         |                      |         |
| Works long hours (48 hours/week or more) wave 2 | –0.27         | .621    | –0.27       | .622    | –0.26       | .629    | –0.26                | .629    |
| Working in private sector wave 2                | –0.80         | .027    | –0.80       | .027    | –0.82       | .023    | –0.82                | .024    |
| Union present wave 2                            | 0.40          | .206    | 0.40        | .210    | 0.41        | .196    | 0.41                 | .198    |
| Occupational level wave 2                       |               |         |             |         |             |         |                      |         |
| Management / professional (ref)                 |               |         |             |         |             |         |                      |         |
| Skilled work                                    | 0.01          | .980    | 0.01        | .983    | 0.02        | .947    | 0.02                 | .946    |
| Partly skilled or unskilled work                | –0.96         | .016    | –0.96       | .016    | –0.94       | .018    | –0.94                | .018    |
| Log corrected wage wave 2                       | –0.04         | .891    | –0.04       | .900    | –0.10       | .753    | –0.10                | .752    |
| Living with partner wave 4                      | 0.02          | .978    | 0.02        | .979    | 0.01        | .986    | 0.01                 | .987    |
| Partner employed wave 4                         | 0.71          | .180    | 0.71        | .179    | 0.71        | .182    | 0.71                 | .182    |
| Partner self-employed wave 4                    | 0.38          | .543    | 0.39        | .540    | 0.37        | .560    | 0.37                 | .559    |
| Partner work hours wave 4                       | –0.03         | .082    | –0.03       | .083    | –0.03       | .082    | –0.03                | .082    |
| Partner log earnings wave 4                     | –0.38         | .170    | –0.38       | .168    | –0.39       | .171    | –0.39                | .171    |
| Partner uses flexible work wave 4               | 0.41          | .318    | 0.41        | .319    | 0.40        | .319    | 0.41                 | .320    |

*Source:* Understanding Society waves 2–4. *Note:* n=500. There were few respondents with a child aged 2 and these respondents did not differ in the dependent variable. As a result, these were excluded from this analysis. Results based on 100 imputed datasets.

**Table A3–10: logistic regression of the likelihood of being employed on use flexible work**

|                                                 | Flexible work |         | Flexitime   |         | Telework    |         | Flexitime & Telework |         |
|-------------------------------------------------|---------------|---------|-------------|---------|-------------|---------|----------------------|---------|
|                                                 | Coefficient   | p-value | Coefficient | p-value | Coefficient | p-value | Coefficient          | p-value |
| Constant                                        | 3.85          | .067    | 3.75        | .072    | 4.07        | .057    | 4.07                 | .057    |
| <i>Main variables</i>                           |               |         |             |         |             |         |                      |         |
| Use flexible work/flexitime wave 2              | 0.29          | .417    | 0.07        | .868    |             |         | 0.01                 | .989    |
| Use telework wave 2                             |               |         |             |         | 0.87        | .204    | 0.87                 | .206    |
| <i>Control variables</i>                        |               |         |             |         |             |         |                      |         |
| Age wave 4                                      | 0.04          | .158    | 0.04        | .164    | 0.04        | .147    | 0.04                 | .147    |
| Age youngest child                              |               |         |             |         |             |         |                      |         |
| 0 wave 4 (ref)                                  |               |         |             |         |             |         |                      |         |
| 1 wave 4                                        | 1.00          | <.001   | 1.00        | <.001   | 1.02        | <.001   | 1.02                 | <.001   |
| Total number of children in household           |               |         |             |         |             |         |                      |         |
| 1 wave 4 (ref)                                  |               |         |             |         |             |         |                      |         |
| 2 wave 4                                        | 0.30          | .359    | 0.31        | .339    | 0.30        | .353    | 0.30                 | .353    |
| 3 or more wave 4                                | -0.18         | .650    | -0.12       | .746    | -0.20       | .605    | -0.20                | .605    |
| Gender attitude wave 2                          | 0.50          | <.001   | 0.50        | <.001   | 0.51        | <.001   | 0.51                 | <.001   |
| Having a degree wave 4                          | -0.12         | .680    | -0.11       | .700    | -0.13       | .659    | -0.13                | .658    |
| Works small part-time (<16 hours/week) wave 2   | -0.90         | .059    | -0.90       | .059    | -0.91       | .056    | -0.91                | .057    |
| Works large part-time (16–34 hours/week) wave 2 | -0.16         | .614    | -0.16       | .620    | -0.16       | .620    | -0.16                | .620    |
| Works full-time (35–47 hours/week) wave 2 (ref) |               |         |             |         |             |         |                      |         |
| Works long hours (48 hours/week or more) wave 2 | -0.29         | .591    | -0.28       | .611    | -0.31       | .565    | -0.31                | .565    |
| Working in private sector wave 2                | -0.81         | .024    | -0.79       | .027    | -0.84       | .020    | -0.84                | .020    |
| Union present wave 2                            | 0.42          | .182    | 0.40        | .203    | 0.43        | .177    | 0.43                 | .178    |
| Occupational level wave 2                       |               |         |             |         |             |         |                      |         |
| Management / professional (ref)                 |               |         |             |         |             |         |                      |         |
| Skilled work                                    | 0.03          | .921    | 0.01        | .975    | 0.02        | .943    | 0.02                 | .943    |
| Partly skilled or unskilled work                | -0.93         | .019    | -0.96       | .016    | -0.94       | .019    | -0.94                | .019    |
| Log corrected wage wave 2                       | -0.06         | .858    | -0.04       | .909    | -0.12       | .711    | -0.12                | .713    |
| Living with partner wave 4                      | 0.03          | .958    | 0.01        | .980    | -0.02       | .972    | -0.02                | .973    |
| Partner employed wave 4                         | 0.70          | .186    | 0.71        | .177    | 0.73        | .172    | 0.73                 | .173    |
| Partner self-employed wave 4                    | 0.35          | .580    | 0.38        | .546    | 0.41        | .521    | 0.41                 | .527    |
| Partner work hours wave 4                       | -0.03         | .080    | -0.03       | .082    | -0.03       | .081    | -0.03                | .081    |
| Partner log earnings wave 4                     | -0.39         | .161    | -0.39       | .165    | -0.39       | .170    | -0.39                | .170    |
| Partner uses flexible work wave 4               | 0.39          | .338    | 0.41        | .313    | 0.41        | .308    | 0.41                 | .310    |

*Source:* Understanding Society waves 2–4. *Note:* n=500. There were few respondents with a child aged 2 and these respondents did not differ in the dependent variable. As a result, these were excluded from this analysis. Results based on 100 imputed datasets.

**Table A3–11: logistic regression of the likelihood of reducing working hours on (perceived) access to flexible work**

|                                                           | Flexible work |         | Flexitime   |         | Telework    |         | Flexitime & Telework |         |
|-----------------------------------------------------------|---------------|---------|-------------|---------|-------------|---------|----------------------|---------|
|                                                           | Coefficient   | p-value | Coefficient | p-value | Coefficient | p-value | Coefficient          | p-value |
| Constant                                                  | 4.15          | .017    | 4.27        | .015    | 3.59        | .040    | 3.60                 | .043    |
| <i>Main variables</i>                                     |               |         |             |         |             |         |                      |         |
| No access to flexible work/flexitime in either wave (ref) |               |         |             |         |             |         |                      |         |
| Access to flexible work/flexitime in wave 4 only          | -0.14         | .718    | -0.06       | .867    |             |         | 0.01                 | .978    |
| Access to flexible work/flexitime in wave 2 only          | 0.14          | .724    | 0.04        | .924    |             |         | 0.12                 | .750    |
| Access to flexible work/flexitime in both waves           | -0.49         | .087    | -0.43       | .157    |             |         | -0.01                | .979    |
| No access to telework in either wave (ref)                |               |         |             |         |             |         |                      |         |
| Access to telework in wave 4 only                         |               |         |             |         | -0.94       | .045    | -0.94                | .066    |
| Access to telework in wave 2 only                         |               |         |             |         | 0.22        | .739    | 0.21                 | .749    |
| Access to telework in both waves                          |               |         |             |         | -1.07       | .011    | -1.06                | .020    |
| <i>Control variables</i>                                  |               |         |             |         |             |         |                      |         |
| Works small part-time (<16 hours/week) wave 2             | -1.65         | .021    | -1.60       | .025    | -1.67       | .020    | -1.68                | .019    |
| Works large part-time (16–34 hours/week) wave 2           | -0.95         | .001    | -0.94       | .001    | -1.02       | .001    | -1.02                | .001    |
| Works full-time (35–47 hours/week) wave 2 (ref)           |               |         |             |         |             |         |                      |         |
| Works long hours (48 hours/week or more) wave 2           | 1.42          | .018    | 1.40        | .021    | 1.56        | .011    | 1.55                 | .013    |
| Age wave 4                                                | 0.01          | .753    | 0.01        | .823    | 0.01        | .832    | 0.01                 | .809    |
| Age youngest child                                        |               |         |             |         |             |         |                      |         |
| 0 wave 4 (ref)                                            |               |         |             |         |             |         |                      |         |
| 1 wave 4                                                  | 0.10          | .742    | 0.11        | .717    | 0.09        | .751    | 0.10                 | .734    |
| 2 wave 4                                                  | 0.87          | .130    | 0.89        | .122    | 0.86        | .142    | 0.87                 | .141    |
| Total number of children in household                     |               |         |             |         |             |         |                      |         |
| 1 wave 4 (ref)                                            |               |         |             |         |             |         |                      |         |
| 2 wave 4                                                  | -1.26         | <.001   | -1.26       | <.001   | -1.32       | <.001   | -1.32                | <.001   |
| 3 or more wave 4                                          | -1.35         | .001    | -1.35       | .001    | -1.32       | .001    | -1.32                | .001    |
| Gender attitude wave 2                                    | -0.15         | .350    | -0.16       | .312    | -0.15       | .339    | -0.15                | .334    |
| Having a degree wave 4                                    | -0.21         | .473    | -0.26       | .383    | -0.23       | .451    | -0.23                | .450    |
| Working in private sector wave 4                          | 0.53          | .102    | 0.48        | .140    | 0.53        | .103    | 0.53                 | .111    |
| Union present wave 4                                      | 0.23          | .459    | 0.25        | .431    | 0.11        | .728    | 0.12                 | .720    |
| Occupational level wave 4                                 |               |         |             |         |             |         |                      |         |
| Management / professional (ref)                           |               |         |             |         |             |         |                      |         |
| Skilled work                                              | -0.87         | .009    | -0.83       | .012    | -0.91       | .007    | -0.92                | .007    |
| Partly skilled or unskilled work                          | -0.00         | .997    | 0.03        | .939    | -0.03       | .941    | -0.03                | .939    |
| Log corrected wage wave 4                                 | -0.44         | .137    | -0.45       | .129    | -0.37       | .218    | -0.37                | .216    |
| Living with partner wave 4                                | -2.66         | .002    | -2.64       | .002    | -2.81       | .001    | -2.82                | .001    |
| Partner employed wave 4                                   | 2.10          | .004    | 2.05        | .005    | 2.25        | .003    | 2.24                 | .003    |
| Partner self-employed wave 4                              | 2.40          | .003    | 2.35        | .004    | 2.53        | .002    | 2.53                 | .002    |
| Partner work hours wave 4                                 | 0.00          | .843    | 0.00        | .936    | 0.00        | .858    | 0.00                 | .862    |
| Partner log earnings wave 4                               | -0.14         | .364    | -0.14       | .380    | -0.07       | .641    | -0.08                | .623    |
| Partner uses flexible work wave 4                         | -0.29         | .394    | -0.30       | .374    | -0.25       | .459    | -0.25                | .460    |

Source: Understanding Society waves 2–4. Note: n=395. Results based on 100 imputed datasets.



**Table A3–12: logistic regression of the likelihood of reducing working hours on use of flexible work**

|                                                     | Flexible work |         | Flexitime   |         | Telework    |         | Flexitime & Telework |         |
|-----------------------------------------------------|---------------|---------|-------------|---------|-------------|---------|----------------------|---------|
|                                                     | Coefficient   | p-value | Coefficient | p-value | Coefficient | p-value | Coefficient          | p-value |
| Constant                                            | 4.01          | .025    | 4.20        | .018    | 3.78        | .030    | 4.19                 | .019    |
| <i>Main variables</i>                               |               |         |             |         |             |         |                      |         |
| No use flexible work/flexitime in either wave (ref) |               |         |             |         |             |         |                      |         |
| Use flexible work/flexitime in wave 4 only          | –0.96         | .035    | –0.64       | .220    |             |         | –0.44                | .422    |
| Use flexible work/flexitime in wave 2 only          | –0.12         | .768    | –0.17       | .712    |             |         | –0.16                | .732    |
| Use flexible work/flexitime in both waves           | –1.76         | <.001   | –2.11       | <.001   |             |         | –2.03                | .001    |
| No use telework in either wave (ref)                |               |         |             |         |             |         |                      |         |
| Use telework in wave 4 only                         |               |         |             |         | –1.46       | .036    | –1.19                | .121    |
| Use telework in wave 2 only                         |               |         |             |         | 0.60        | .445    | 0.75                 | .334    |
| Use telework in both waves                          |               |         |             |         | –0.83       | .234    | –0.43                | .551    |
| <i>Control variables</i>                            |               |         |             |         |             |         |                      |         |
| Works small part-time (<16 hours/week) wave 2       | –1.57         | .030    | –1.53       | .032    | –1.56       | .030    | –1.56                | .031    |
| Works large part-time (16–34 hours/week) wave 2     | –0.97         | .001    | –0.92       | .002    | –0.91       | .002    | –0.93                | .002    |
| Works full-time (35–47 hours/week) wave 2 (ref)     |               |         |             |         |             |         |                      |         |
| Works long hours (48 hours/week or more) wave 2     | 1.40          | .023    | 1.24        | .042    | 1.63        | .008    | 1.34                 | .031    |
| Age wave 4                                          | 0.01          | .759    | 0.01        | .666    | 0.01        | .829    | 0.01                 | .665    |
| Age youngest child                                  |               |         |             |         |             |         |                      |         |
| 0 wave 4 (ref)                                      |               |         |             |         |             |         |                      |         |
| 1 wave 4                                            | 0.08          | .783    | 0.12        | .677    | 0.04        | .889    | 0.08                 | .784    |
| 2 wave 4                                            | 0.81          | .159    | 0.80        | .160    | 0.78        | .175    | 0.79                 | .173    |
| Total number of children in household               |               |         |             |         |             |         |                      |         |
| 1 wave 4 (ref)                                      |               |         |             |         |             |         |                      |         |
| 2 wave 4                                            | –1.39         | <.001   | –1.44       | <.001   | –1.28       | <.001   | –1.46                | <.001   |
| 3 or more wave 4                                    | –1.45         | <.001   | –1.54       | <.001   | –1.29       | .001    | –1.54                | <.001   |
| Gender attitude wave 2                              | –0.10         | .547    | –0.09       | .590    | –0.15       | .325    | –0.09                | .573    |
| Having a degree wave 4                              | –0.13         | .659    | –0.19       | .522    | –0.23       | .430    | –0.19                | .531    |
| Working in private sector wave 4                    | 0.52          | .112    | 0.34        | .296    | 0.56        | .084    | 0.38                 | .256    |
| Union present wave 4                                | 0.15          | .636    | 0.20        | .534    | 0.13        | .676    | 0.16                 | .620    |
| Occupational level wave 4                           |               |         |             |         |             |         |                      |         |
| Management / professional (ref)                     |               |         |             |         |             |         |                      |         |
| Skilled work                                        | –0.91         | .007    | –0.81       | .017    | –0.87       | .009    | –0.85                | .014    |
| Partly skilled or unskilled work                    | –0.03         | .944    | 0.06        | .897    | 0.05        | .917    | 0.04                 | .928    |
| Log corrected wage wave 4                           | –0.41         | .175    | –0.44       | .137    | –0.40       | .179    | –0.42                | .159    |
| Living with partner wave 4                          | –2.68         | .002    | –2.75       | .001    | –2.61       | .002    | –2.81                | .001    |
| Partner employed wave 4                             | 2.24          | .003    | 2.15        | .004    | 2.17        | .004    | 2.27                 | .003    |
| Partner self-employed wave 4                        | 2.52          | .003    | 2.47        | .003    | 2.42        | .003    | 2.57                 | .002    |
| Partner work hours wave 4                           | –0.00         | .931    | –0.00       | .792    | 0.00        | .898    | –0.00                | .827    |
| Partner log earnings wave 4                         | –0.11         | .503    | –0.10       | .528    | –0.12       | .447    | –0.11                | .486    |
| Partner uses flexible work wave 4                   | –0.27         | .438    | –0.29       | .404    | –0.30       | .380    | –0.28                | .420    |

Source: Understanding Society waves 2–4. Note: n=395. Results based on 100 imputed datasets.

**Table A3–13: logistic regression of the likelihood of being employed on (perceived) access to flexible work – only first child**

|                                                 | Flexible work |         | Flexitime   |         | Telework    |         | Flexitime & Telework |         |
|-------------------------------------------------|---------------|---------|-------------|---------|-------------|---------|----------------------|---------|
|                                                 | Coefficient   | p-value | Coefficient | p-value | Coefficient | p-value | Coefficient          | p-value |
| Constant                                        | 6.10          | .123    | 6.04        | .130    | 6.03        | .136    | 6.45                 | .122    |
| <i>Main variables</i>                           |               |         |             |         |             |         |                      |         |
| Access to flexible work/flexitime wave 2        | 0.87          | .060    | 0.91        | .067    |             |         | 0.77                 | .131    |
| Access to telework wave 2                       |               |         |             |         | 1.69        | .123    | 1.43                 | .196    |
| <i>Control variables</i>                        |               |         |             |         |             |         |                      |         |
| Age wave 4                                      | -0.07         | .143    | -0.06       | .160    | -0.07       | .126    | -0.07                | .148    |
| Age youngest child                              |               |         |             |         |             |         |                      |         |
| 0 wave 4 (ref)                                  |               |         |             |         |             |         |                      |         |
| 1 wave 4                                        | 0.20          | .683    | 0.27        | .579    | 0.29        | .550    | 0.29                 | .555    |
| Gender attitude wave 2                          | 0.20          | .429    | 0.23        | .350    | 0.25        | .293    | 0.22                 | .368    |
| Having a degree wave 4                          | 0.05          | .922    | 0.11        | .825    | 0.13        | .789    | 0.08                 | .872    |
| Works small part-time (<16 hours/week) wave 2   | -2.06         | .123    | -2.08       | .121    | -2.18       | .104    | -2.08                | .121    |
| Works large part-time (16–34 hours/week) wave 2 | -0.04         | .951    | -0.10       | .871    | 0.00        | .995    | -0.06                | .925    |
| Works full-time (35–47 hours/week) wave 2 (ref) |               |         |             |         |             |         |                      |         |
| Works long hours (48 hours/week or more) wave 2 | 0.32          | .655    | 0.25        | .721    | 0.23        | .742    | 0.27                 | .705    |
| Working in private sector wave 2                | -1.07         | .105    | -1.00       | .128    | -0.95       | .149    | -1.06                | .114    |
| Union present wave 2                            | 0.35          | .510    | 0.38        | .481    | 0.45        | .393    | 0.41                 | .449    |
| Occupational level wave 2                       |               |         |             |         |             |         |                      |         |
| Management / professional (ref)                 |               |         |             |         |             |         |                      |         |
| Skilled work                                    | -0.09         | .863    | -0.05       | .924    | 0.04        | .936    | 0.02                 | .963    |
| Partly skilled or unskilled work                | -0.70         | .315    | -0.71       | .303    | -0.61       | .383    | -0.69                | .326    |
| Log corrected wage wave 2                       | 0.36          | .462    | 0.37        | .449    | 0.34        | .484    | 0.29                 | .554    |
| Living with partner wave 4                      | 1.05          | .305    | 1.02        | .318    | 0.89        | .381    | 1.02                 | .324    |
| Partner employed wave 4                         | 0.11          | .898    | 0.15        | .863    | 0.24        | .788    | 0.11                 | .904    |
| Partner self-employed wave 4                    | 0.69          | .553    | 0.75        | .516    | 0.82        | .477    | 0.70                 | .552    |
| Partner work hours wave 4                       | -0.03         | .381    | -0.02       | .466    | -0.02       | .482    | -0.02                | .543    |
| Partner log earnings wave 4                     | -0.49         | .363    | -0.54       | .329    | -0.50       | .366    | -0.56                | .329    |
| Partner uses flexible work wave 4               | 0.58          | .365    | 0.61        | .333    | 0.66        | .289    | 0.58                 | .362    |

*Source:* Understanding Society waves 2–4. *Note:* n=206. Results based on 100 imputed datasets. There were few respondents with a child aged 2 and these respondents did not differ in the dependent variable. As a result, these were excluded from this analysis.

**Table A3–14: logistic regression of the likelihood of being employed on use flexible work – first child only**

|                                                 | Flexible work |         | Flexitime   |         | Telework    |         | Flexitime & Telework |         |
|-------------------------------------------------|---------------|---------|-------------|---------|-------------|---------|----------------------|---------|
|                                                 | Coefficient   | p-value | Coefficient | p-value | Coefficient | p-value | Coefficient          | p-value |
| Constant                                        | 5.66          | .143    | 5.45        | .154    |             |         |                      |         |
| <i>Main variables</i>                           |               |         |             |         |             |         |                      |         |
| Use flexible work/flexitime wave 2              | 0.66          | .326    | 0.75        | .335    |             |         |                      |         |
| Use telework wave 2                             |               |         |             |         |             |         |                      |         |
| <i>Control variables</i>                        |               |         |             |         |             |         |                      |         |
| Age wave 4                                      | -0.07         | .149    | -0.07       | .151    |             |         |                      |         |
| Age youngest child                              |               |         |             |         |             |         |                      |         |
| 0 wave 4 (ref)                                  |               |         |             |         |             |         |                      |         |
| 1 wave 4                                        | 0.27          | .574    | 0.23        | .623    |             |         |                      |         |
| Gender attitude wave 2                          | 0.23          | .340    | 0.23        | .340    |             |         |                      |         |
| Having a degree wave 4                          | 0.16          | .733    | 0.17        | .724    |             |         |                      |         |
| Works small part-time (<16 hours/week) wave 2   | -2.34         | .084    | -2.32       | .084    |             |         |                      |         |
| Works large part-time (16–34 hours/week) wave 2 | -0.08         | .898    | -0.04       | .949    |             |         |                      |         |
| Works full-time (35–47 hours/week) wave 2 (ref) |               |         |             |         |             |         |                      |         |
| Works long hours (48 hours/week or more) wave 2 | 0.21          | .767    | 0.21        | .764    |             |         |                      |         |
| Working in private sector wave 2                | -0.83         | .202    | -0.81       | .217    |             |         |                      |         |
| Union present wave 2                            | 0.48          | .368    | 0.47        | .372    |             |         |                      |         |
| Occupational level wave 2                       |               |         |             |         |             |         |                      |         |
| Management / professional (ref)                 |               |         |             |         |             |         |                      |         |
| Skilled work                                    | -0.03         | .955    | -0.05       | .931    |             |         |                      |         |
| Partly skilled or unskilled work                | -0.52         | .454    | -0.53       | .438    |             |         |                      |         |
| Log corrected wage wave 2                       | 0.42          | .384    | 0.44        | .364    |             |         |                      |         |
| Living with partner wave 4                      | 0.94          | .350    | 0.97        | .336    |             |         |                      |         |
| Partner employed wave 4                         | 0.29          | .741    | 0.27        | .760    |             |         |                      |         |
| Partner self-employed wave 4                    | 0.83          | .472    | 0.83        | .468    |             |         |                      |         |
| Partner work hours wave 4                       | -0.02         | .402    | -0.03       | .369    |             |         |                      |         |
| Partner log earnings wave 4                     | -0.51         | .337    | -0.48       | .357    |             |         |                      |         |
| Partner uses flexible work wave 4               | 0.62          | .320    | 0.64        | .304    |             |         |                      |         |

*Source:* Understanding Society waves 2–4. *Note:* n=206. Results based on 100 imputed datasets. There were few respondents with a child aged 2 and these respondents did not differ in the dependent variable. As a result, these were excluded from this analysis. Telework perfectly predicted employment and therefore the analyses for telework were not done.

**Table A3–15: logistic regression of the likelihood of reducing working hours on (perceived) access to flexible work – only first child**

|                                                           | Flexible work |         | Flexitime   |         | Telework    |         | Flexitime & Telework |         |
|-----------------------------------------------------------|---------------|---------|-------------|---------|-------------|---------|----------------------|---------|
|                                                           | Coefficient   | p-value | Coefficient | p-value | Coefficient | p-value | Coefficient          | p-value |
| Constant                                                  | 2.70          | .410    | 3.55        | .282    | 2.25        | .496    | 3.38                 | .335    |
| <i>Main variables</i>                                     |               |         |             |         |             |         |                      |         |
| No access to flexible work/flexitime in either wave (ref) |               |         |             |         |             |         |                      |         |
| Access to flexible work/flexitime in wave 4 only          | 0.82          | .264    | 0.04        | .957    |             |         | 0.07                 | .921    |
| Access to flexible work/flexitime in wave 2 only          | 0.79          | .299    | 0.65        | .388    |             |         | 0.58                 | .446    |
| Access to flexible work/flexitime in both waves           | –0.77         | .109    | –0.99       | .034    |             |         | –0.99                | .080    |
| No access to telework in either wave (ref)                |               |         |             |         |             |         |                      |         |
| Access to telework in wave 4 only                         |               |         |             |         | –0.77       | .187    | –0.18                | .793    |
| Access to telework in wave 2 only                         |               |         |             |         | 0.74        | .504    | 1.20                 | .318    |
| Access to telework in both waves                          |               |         |             |         | –0.76       | .216    | –0.10                | .887    |
| <i>Control variables</i>                                  |               |         |             |         |             |         |                      |         |
| Works small part-time (<16 hours/week) wave 2             | –             | –       | –           | –       | –           | –       | –                    | –       |
| Works large part-time (16–34 hours/week) wave 2           | –1.19         | .045    | –1.14       | .053    | –1.08       | .061    | –1.14                | .056    |
| Works full-time (35–47 hours/week) wave 2 (ref)           |               |         |             |         |             |         |                      |         |
| Works long hours (48 hours/week or more) wave 2           | 1.83          | .047    | 1.88        | .040    | 2.19        | .020    | 2.01                 | .031    |
| Age wave 4                                                | –0.01         | .793    | –0.01       | .920    | –0.02       | .632    | –0.02                | .768    |
| Age youngest child                                        |               |         |             |         |             |         |                      |         |
| 0 wave 4 (ref)                                            |               |         |             |         |             |         |                      |         |
| 1 wave 4                                                  | 0.64          | .220    | 0.59        | .255    | 0.66        | .197    | 0.70                 | .189    |
| 2 wave 4                                                  | 1.93          | .141    | 2.11        | .120    | 1.83        | .150    | 2.27                 | .109    |
| Gender attitude wave 2                                    | 0.11          | .717    | 0.08        | .775    | 0.05        | .844    | 0.10                 | .723    |
| Having a degree wave 4                                    | –0.22         | .693    | –0.38       | .469    | –0.43       | .396    | –0.41                | .451    |
| Working in private sector wave 4                          | 0.23          | .663    | 0.06        | .917    | 0.18        | .738    | –0.09                | .875    |
| Union present wave 4                                      | 0.02          | .968    | –0.04       | .945    | –0.12       | .820    | –0.16                | .766    |
| Occupational level wave 4                                 |               |         |             |         |             |         |                      |         |
| Management / professional (ref)                           |               |         |             |         |             |         |                      |         |
| Skilled work                                              | –0.10         | .861    | –0.12       | .837    | –0.10       | .857    | –0.10                | .867    |
| Partly skilled or unskilled work                          | –0.09         | .924    | –0.11       | .894    | 0.10        | .910    | –0.13                | .879    |
| Log corrected wage wave 4                                 | –0.31         | .581    | –0.41       | .458    | –0.16       | .769    | –0.39                | .491    |
| Living with partner wave 4                                | –2.04         | .103    | –2.17       | .085    | –2.31       | .059    | –2.26                | .071    |
| Partner employed wave 4                                   | 1.92          | .039    | 2.01        | .031    | 2.18        | .016    | 2.11                 | .022    |
| Partner self-employed wave 4                              | 1.61          | .131    | 1.70        | .113    | 1.85        | .079    | 1.67                 | .123    |
| Partner work hours wave 4                                 | 0.01          | .825    | 0.00        | .997    | 0.00        | .916    | 0.00                 | .950    |
| Partner log earnings wave 4                               | –0.05         | .910    | –0.05       | .908    | 0.04        | .930    | 0.01                 | .989    |
| Partner uses flexible work wave 4                         | –0.61         | .248    | –0.66       | .217    | –0.65       | .215    | –0.67                | .221    |

Source: Understanding Society waves 2–4. Note: n=165. Results based on 100 imputed datasets. There are no mothers with only one child in the household who are employed in a small part-time job in this sample so this effect is not estimated.

**Table A3–16: logistic regression of the likelihood of reducing working hours on use of flexible work – only first child**

|                                                     | Flexible work |         | Flexitime   |         | Telework    |         | Flexitime & Telework |         |
|-----------------------------------------------------|---------------|---------|-------------|---------|-------------|---------|----------------------|---------|
|                                                     | Coefficient   | p-value | Coefficient | p-value | Coefficient | p-value | Coefficient          | p-value |
| Constant                                            | 2.95          | .375    | 3.41        | .296    | 3.38        | .318    | 4.03                 | .256    |
| <i>Main variables</i>                               |               |         |             |         |             |         |                      |         |
| No use flexible work/flexitime in either wave (ref) |               |         |             |         |             |         |                      |         |
| Use flexible work/flexitime in wave 4 only          | -0.97         | .133    | -0.59       | .467    |             |         | -0.43                | .616    |
| Use flexible work/flexitime in wave 2 only          | 1.03          | .287    | 0.38        | .659    |             |         | 0.41                 | .652    |
| Use flexible work/flexitime in both waves           | -1.40         | .015    | -2.01       | .003    |             |         | -2.45                | .003    |
| No use telework in either wave (ref)                |               |         |             |         |             |         |                      |         |
| Use telework in wave 4 only                         |               |         |             |         | -1.19       | .198    | -0.94                | .352    |
| Use telework in wave 2 only                         |               |         |             |         | -           | -       | -                    | -       |
| Use telework in both waves                          |               |         |             |         | 0.26        | .832    | 1.51                 | .299    |
| <i>Control variables</i>                            |               |         |             |         |             |         |                      |         |
| Works small part-time (<16 hours/week) wave 2       | -             | -       | -           | -       | -           | -       | -                    | -       |
| Works large part-time (16–34 hours/week) wave 2     | -1.17         | .048    | -1.18       | .044    | -0.96       | .106    | -1.09                | .073    |
| Works full-time (35–47 hours/week) wave 2 (ref)     |               |         |             |         |             |         |                      |         |
| Works long hours (48 hours/week or more) wave 2     | 2.07          | .032    | 1.79        | .058    | 2.65        | .013    | 2.38                 | .035    |
| Age wave 4                                          | -0.02         | .661    | -0.00       | .989    | -0.03       | .600    | 0.00                 | .961    |
| <i>Age youngest child</i>                           |               |         |             |         |             |         |                      |         |
| 0 wave 4 (ref)                                      |               |         |             |         |             |         |                      |         |
| 1 wave 4                                            | 0.63          | .222    | 0.70        | .176    | 0.81        | .118    | 0.87                 | .114    |
| 2 wave 4                                            | 1.85          | .141    | 2.09        | .110    | 2.27        | .084    | 2.58                 | .068    |
| Gender attitude wave 2                              | 0.07          | .821    | 0.12        | .675    | 0.06        | .840    | 0.22                 | .465    |
| Having a degree wave 4                              | -0.24         | .642    | -0.29       | .580    | -0.36       | .479    | -0.18                | .732    |
| Working in private sector wave 4                    | 0.22          | .677    | 0.01        | .991    | 0.49        | .358    | 0.12                 | .836    |
| Union present wave 4                                | 0.04          | .941    | 0.04        | .936    | 0.09        | .872    | 0.09                 | .874    |
| <i>Occupational level wave 4</i>                    |               |         |             |         |             |         |                      |         |
| Management / professional (ref)                     |               |         |             |         |             |         |                      |         |
| Skilled work                                        | -0.02         | .967    | -0.02       | .979    | 0.04        | .937    | 0.16                 | .798    |
| Partly skilled or unskilled work                    | 0.12          | .890    | 0.08        | .926    | 0.30        | .718    | 0.25                 | .769    |
| Log corrected wage wave 4                           | -0.12         | .832    | -0.33       | .566    | -0.14       | .801    | -0.40                | .515    |
| Living with partner wave 4                          | -2.61         | .044    | -2.65       | .040    | -2.94       | .028    | -3.56                | .014    |
| Partner employed wave 4                             | 2.44          | .010    | 2.17        | .018    | 2.78        | .008    | 2.97                 | .007    |
| Partner self-employed wave 4                        | 2.03          | .068    | 1.82        | .088    | 2.40        | .042    | 2.50                 | .042    |
| Partner work hours wave 4                           | 0.00          | .914    | -0.01       | .803    | 0.01        | .827    | -0.01                | .874    |
| Partner log earnings wave 4                         | -0.09         | .832    | -0.03       | .934    | -0.21       | .628    | -0.15                | .748    |
| Partner uses flexible work wave 4                   | -0.72         | .190    | -0.68       | .209    | 0.75        | .161    | -0.63                | .267    |

*Source:* Understanding Society waves 2–4. *Note:* n=165, 161 for models with telework. Results based on 100 imputed datasets. There are no mothers with only one child in the household who is employed in a small part-time job in this sample so this effect is not estimated.

### **3.3 Robust standard errors**

Next, we looked at robust standard errors. These standard errors “are considered robust in the sense that they provide correct standard errors in the presence of violations of the assumptions of the model” (Long & Freese, 2006: p. 86). It is for small-samples and non-linear models not clear whether robust standard errors are better than normal standard errors and they can in fact perform worse than the normal standard errors (see Long & Freese, 2006). Hence, rather than presenting these robust standard errors in the main paper, we check as robustness check whether it matters for our conclusions whether we use robust standard errors.

We replicated the tables of the main paper with robust standard errors (on next pages). Again, the relationship between reducing working hours and (perceived) access to telework in both waves went just above the conventional significance level ( $p=.052$ ). The result of use of flexitime remained, both in the full sample and when looking at women with one child only. For only having one child in the household, the effect of (perceived) access to flexitime also remained.

**Table A3–17: logistic regression of the likelihood of reducing working hours on (perceived) access to flexible work**

|                                                           | Flexible work |         | Flexitime   |         | Telework    |         | Flexitime & Telework |         |
|-----------------------------------------------------------|---------------|---------|-------------|---------|-------------|---------|----------------------|---------|
|                                                           | Coefficient   | p-value | Coefficient | p-value | Coefficient | p-value | Coefficient          | p-value |
| Constant                                                  | 5.53          | .010    | 5.54        | .012    | 4.86        | .023    | 4.64                 | .033    |
| <i>Main variables</i>                                     |               |         |             |         |             |         |                      |         |
| No access to flexible work/flexitime in either wave (ref) |               |         |             |         |             |         |                      |         |
| Access to flexible work/flexitime in wave 4 only          | –0.39         | .468    | 0.09        | .870    |             |         | 0.15                 | .791    |
| Access to flexible work/flexitime in wave 2 only          | –0.36         | .435    | 0.00        | .994    |             |         | 0.15                 | .711    |
| Access to flexible work/flexitime in both waves           | –0.70         | .074    | –0.43       | .262    |             |         | 0.19                 | .699    |
| No access to telework in either wave (ref)                |               |         |             |         |             |         |                      |         |
| Access to telework in wave 4 only                         |               |         |             |         | –1.36       | .011    | –1.47                | .020    |
| Access to telework in wave 2 only                         |               |         |             |         | –0.39       | .691    | –0.45                | .655    |
| Access to telework in both waves                          |               |         |             |         | –1.07       | .038    | –1.15                | .052    |
| <i>Control variables</i>                                  |               |         |             |         |             |         |                      |         |
| Works small part-time (<16 hours/week) wave 2             | –2.26         | .010    | –2.15       | .018    | –2.27       | .014    | –2.28                | .016    |
| Works large part-time (16–34 hours/week) wave 2           | –1.42         | <.001   | –1.40       | <.001   | –1.48       | <.001   | –1.48                | <.001   |
| Works full-time (35–47 hours/week) wave 2 (ref)           |               |         |             |         |             |         |                      |         |
| Works long hours (48 hours/week or more) wave 2           | 1.75          | .031    | 1.74        | .040    | 1.87        | .021    | 1.93                 | .019    |
| Age wave 4                                                | –0.03         | .429    | –0.02       | .473    | –0.03       | .410    | –0.03                | .424    |
| Age youngest child                                        |               |         |             |         |             |         |                      |         |
| 0 wave 4 (ref)                                            |               |         |             |         |             |         |                      |         |
| 1 wave 4                                                  | 0.92          | .027    | 0.89        | .027    | 0.86        | .031    | 0.86                 | .032    |
| 2 wave 4                                                  | 1.60          | .049    | 1.62        | .043    | 1.61        | .053    | 1.60                 | .059    |
| Total number of children in household                     |               |         |             |         |             |         |                      |         |
| 1 wave 4 (ref)                                            |               |         |             |         |             |         |                      |         |
| 2 wave 4                                                  | –1.45         | <.001   | –1.46       | <.001   | –1.55       | <.001   | –1.56                | <.001   |
| 3 or more wave 4                                          | –1.15         | .020    | –1.17       | .020    | –1.09       | .028    | –1.08                | .030    |
| Gender attitude wave 2                                    | –0.29         | .132    | –0.31       | .103    | –0.30       | .115    | –0.30                | .120    |
| Having a degree wave 4                                    | –0.69         | .062    | –0.73       | .049    | –0.66       | .078    | –0.66                | .085    |
| Working in private sector wave 4                          | 0.58          | .208    | 0.47        | .311    | 0.61        | .189    | 0.62                 | .185    |
| Union present wave 4                                      | 0.20          | .650    | 0.22        | .624    | 0.15        | .732    | 0.13                 | .766    |
| Occupational level wave 4                                 |               |         |             |         |             |         |                      |         |
| Management / professional (ref)                           |               |         |             |         |             |         |                      |         |
| Skilled work                                              | –1.09         | .006    | –1.09       | .006    | –1.18       | .005    | –1.19                | .005    |
| Partly skilled or unskilled work                          | –0.52         | .394    | –0.44       | .455    | –0.50       | .394    | –0.46                | .442    |
| Log corrected wage wave 4                                 | –0.20         | .625    | –0.25       | .558    | –0.14       | .747    | –0.13                | .764    |
| Living with partner wave 4                                | –3.98         | <.001   | –3.88       | <.001   | –4.08       | <.001   | –4.07                | <.001   |
| Partner employed wave 4                                   | 3.09          | <.001   | 2.95        | <.001   | 3.22        | <.001   | 3.22                 | <.001   |
| Partner self-employed wave 4                              | 3.49          | <.001   | 3.36        | <.001   | 3.64        | <.001   | 3.65                 | <.001   |
| Partner work hours wave 4                                 | –0.00         | .797    | –0.01       | .716    | –0.01       | .738    | –0.01                | .736    |
| Partner log earnings wave 4                               | –0.16         | .302    | –0.15       | .317    | –0.09       | .572    | –0.08                | .621    |
| Partner uses flexible work wave 4                         | –0.68         | .099    | –0.67       | .103    | –0.66       | .117    | –0.66                | .116    |
| Pseudo R <sup>2</sup>                                     | 0.28          |         | 0.27        |         | 0.29        |         | 0.29                 |         |

Source: Understanding Society waves 2–4. Note: n=272.

**Table A3–18: logistic regression of the likelihood of reducing working hours on use of flexible work**

|                                                     | Flexible work |         | Flexitime   |         | Telework    |         | Flexitime & Telework |         |
|-----------------------------------------------------|---------------|---------|-------------|---------|-------------|---------|----------------------|---------|
|                                                     | Coefficient   | p-value | Coefficient | p-value | Coefficient | p-value | Coefficient          | p-value |
| Constant                                            | 5.82          | .009    | 5.63        | .009    | 4.86        | .025    | 5.57                 | .011    |
| <i>Main variables</i>                               |               |         |             |         |             |         |                      |         |
| No use flexible work/flexitime in either wave (ref) |               |         |             |         |             |         |                      |         |
| Use flexible work/flexitime in wave 4 only          | -1.86         | .013    | -1.26       | .231    |             |         | -1.04                | .368    |
| Use flexible work/flexitime in wave 2 only          | -0.77         | .158    | -0.38       | .472    |             |         | -0.34                | .529    |
| Use flexible work/flexitime in both waves           | -1.82         | .001    | -2.12       | <.001   |             |         | -2.06                | .001    |
| No use telework in either wave (ref)                |               |         |             |         |             |         |                      |         |
| Use telework in wave 4 only                         |               |         |             |         | -1.61       | .011    | -1.19                | .124    |
| Use telework in wave 2 only                         |               |         |             |         | -0.13       | .924    | 0.32                 | .844    |
| Use telework in both waves                          |               |         |             |         | -0.78       | .383    | -0.27                | .756    |
| <i>Control variables</i>                            |               |         |             |         |             |         |                      |         |
| Works small part-time (<16 hours/week) wave 2       | -2.25         | .013    | -2.01       | .024    | -2.06       | .023    | -1.98                | .025    |
| Works large part-time (16–34 hours/week) wave 2     | -1.49         | <.001   | -1.36       | .001    | -1.30       | .001    | -1.33                | .001    |
| Works full-time (35–47 hours/week) wave 2 (ref)     |               |         |             |         |             |         |                      |         |
| Works long hours (48 hours/week or more) wave 2     | 1.85          | .036    | 1.50        | .079    | 2.06        | .019    | 1.61                 | .068    |
| Age wave 4                                          | -0.03         | .360    | -0.01       | .647    | -0.03       | .402    | -0.02                | .601    |
| Age youngest child                                  |               |         |             |         |             |         |                      |         |
| 0 wave 4 (ref)                                      |               |         |             |         |             |         |                      |         |
| 1 wave 4                                            | 0.89          | .030    | 0.91        | .027    | 0.75        | .054    | 0.84                 | .039    |
| 2 wave 4                                            | 1.59          | .062    | 1.50        | .047    | 1.45        | .067    | 1.47                 | .056    |
| Total number of children in household               |               |         |             |         |             |         |                      |         |
| 1 wave 4 (ref)                                      |               |         |             |         |             |         |                      |         |
| 2 wave 4                                            | -1.53         | <.001   | -1.67       | <.001   | -1.47       | <.001   | -1.70                | <.001   |
| 3 or more wave 4                                    | -1.11         | .030    | -1.39       | .008    | -1.07       | .029    | -1.37                | .008    |
| Gender attitude wave 2                              | -0.23         | .276    | -0.22       | .266    | -0.29       | .132    | -0.21                | .279    |
| Having a degree wave 4                              | -0.62         | .107    | -0.66       | .083    | -0.63       | .083    | -0.63                | .104    |
| Working in private sector wave 4                    | 0.60          | .211    | 0.34        | .484    | 0.64        | .193    | 0.41                 | .429    |
| Union present wave 4                                | 0.12          | .792    | 0.16        | .728    | 0.12        | .777    | 0.14                 | .750    |
| Occupational level wave 4                           |               |         |             |         |             |         |                      |         |
| Management / professional (ref)                     |               |         |             |         |             |         |                      |         |
| Skilled work                                        | -1.32         | .002    | -1.11       | .007    | -1.14       | .005    | -1.15                | .006    |
| Partly skilled or unskilled work                    | -0.63         | .324    | -0.50       | .407    | -0.41       | .479    | -0.52                | .384    |
| Log corrected wage wave 4                           | -0.24         | .572    | -0.26       | .538    | -0.20       | .656    | -0.24                | .582    |
| Living with partner wave 4                          | -3.95         | <.001   | -3.97       | <.001   | -3.79       | <.001   | -3.95                | <.001   |
| Partner employed wave 4                             | 3.20          | <.001   | 3.00        | <.001   | 3.03        | <.001   | 3.06                 | <.001   |
| Partner self-employed wave 4                        | 3.71          | <.001   | 3.45        | <.001   | 3.48        | <.001   | 3.50                 | <.001   |
| Partner work hours wave 4                           | -0.01         | .670    | -0.01       | .579    | -0.01       | .717    | -0.01                | .575    |
| Partner log earnings wave 4                         | -0.13         | .392    | -0.13       | .379    | -0.10       | .478    | -0.12                | .399    |
| Partner uses flexible work wave 4                   | -0.63         | .143    | -0.65       | .117    | -0.67       | .116    | -0.64                | .121    |
| Pseudo R <sup>2</sup>                               | 0.32          |         | 0.30        |         | 0.28        |         | 0.31                 |         |

Source: Understanding Society waves 2–4. Note: n=272.



**Table A3–19: logistic regression of the likelihood of reducing working hours on (perceived) access to flexible work – only first child**

|                                                           | Flexible work |         | Flexitime   |         | Telework    |         | Flexitime & Telework |         |
|-----------------------------------------------------------|---------------|---------|-------------|---------|-------------|---------|----------------------|---------|
|                                                           | Coefficient   | p-value | Coefficient | p-value | Coefficient | p-value | Coefficient          | p-value |
| Constant                                                  | 6.42          | .091    | 9.25        | .040    | 4.88        | .249    | 9.48                 | .089    |
| <i>Main variables</i>                                     |               |         |             |         |             |         |                      |         |
| No access to flexible work/flexitime in either wave (ref) |               |         |             |         |             |         |                      |         |
| Access to flexible work/flexitime in wave 4 only          | –0.79         | .515    | –1.22       | .318    |             |         | –1.21                | .350    |
| Access to flexible work/flexitime in wave 2 only          | –0.03         | .970    | 0.18        | .805    |             |         | 0.37                 | .617    |
| Access to flexible work/flexitime in both waves           | –1.87         | .011    | –1.96       | .002    |             |         | –1.83                | .014    |
| No access to telework in either wave (ref)                |               |         |             |         |             |         |                      |         |
| Access to telework in wave 4 only                         |               |         |             |         | –1.88       | .019    | –0.79                | .393    |
| Access to telework in wave 2 only                         |               |         |             |         | –0.49       | .651    | –0.35                | .756    |
| Access to telework in both waves                          |               |         |             |         | –0.72       | .375    | 0.35                 | .733    |
| <i>Control variables</i>                                  |               |         |             |         |             |         |                      |         |
| Works small part-time (<16 hours/week) wave 2             | –             | –       | –           | –       | –           | –       | –                    | –       |
| Works large part-time (16–34 hours/week) wave 2           | –1.80         | .035    | –1.77       | .042    | –1.38       | .080    | –1.72                | .051    |
| Works full-time (35–47 hours/week) wave 2 (ref)           |               |         |             |         |             |         |                      |         |
| Works long hours (48 hours/week or more) wave 2           | 4.79          | .007    | 4.92        | .004    | 4.92        | .002    | 5.08                 | .003    |
| Age wave 4                                                | –0.11         | .122    | –0.11       | .119    | –0.13       | .131    | –0.11                | .154    |
| Age youngest child                                        |               |         |             |         |             |         |                      |         |
| 0 wave 4 (ref)                                            |               |         |             |         |             |         |                      |         |
| 1 wave 4                                                  | 1.94          | .005    | 1.91        | .009    | 1.63        | .017    | 1.92                 | .014    |
| 2 wave 4                                                  | 4.37          | .093    | 4.79        | .095    | 3.01        | .116    | 4.77                 | .107    |
| Gender attitude wave 2                                    | 0.12          | .752    | 0.03        | .937    | 0.04        | .920    | 0.01                 | .974    |
| Having a degree wave 4                                    | –0.96         | .208    | –1.21       | .105    | –1.21       | .100    | –1.35                | .073    |
| Working in private sector wave 4                          | 0.72          | .237    | 0.42        | .541    | 0.76        | .293    | 0.53                 | .457    |
| Union present wave 4                                      | –0.73         | .296    | –0.74       | .319    | –0.53       | .495    | –0.69                | .360    |
| Occupational level wave 4                                 |               |         |             |         |             |         |                      |         |
| Management / professional (ref)                           |               |         |             |         |             |         |                      |         |
| Skilled work                                              | –0.01         | .985    | –0.04       | .954    | –0.01       | .990    | –0.06                | .942    |
| Partly skilled or unskilled work                          | –0.25         | .831    | –0.32       | .750    | 0.13        | .899    | –0.34                | .730    |
| Log corrected wage wave 4                                 | 0.22          | .756    | –0.04       | .955    | 0.52        | .477    | –0.04                | .964    |
| Living with partner wave 4                                | –4.58         | .012    | –4.73       | .013    | –3.88       | .043    | –4.80                | .017    |
| Partner employed wave 4                                   | 5.10          | .002    | 5.13        | .002    | 4.55        | .001    | 5.25                 | .002    |
| Partner self-employed wave 4                              | 3.33          | .044    | 3.00        | .068    | 3.25        | .029    | 3.16                 | .052    |
| Partner work hours wave 4                                 | 0.01          | .874    | –0.02       | .572    | –0.01       | .813    | –0.03                | .544    |
| Partner log earnings wave 4                               | –0.25         | .502    | –0.27       | .504    | –0.17       | .633    | –0.29                | .496    |
| Partner uses flexible work wave 4                         | –2.08         | .005    | –2.30       | .004    | –1.97       | .008    | –2.36                | .007    |
| Pseudo R <sup>2</sup>                                     | 0.31          |         | 0.32        |         | 0.28        |         | 0.33                 |         |

Source: Understanding Society waves 2–4. Note: n=117. There are no women who works in a small part-time job in wave 2 in this sample.

**Table A3–20: logistic regression of the likelihood of reducing working hours on use of flexible work – only first child**

|                                                     | Flexible work |         | Flexitime   |         | Telework    |         | Flexitime & Telework |         |
|-----------------------------------------------------|---------------|---------|-------------|---------|-------------|---------|----------------------|---------|
|                                                     | Coefficient   | p-value | Coefficient | p-value | Coefficient | p-value | Coefficient          | p-value |
| Constant                                            | 6.55          | .110    | 7.35        | .074    | 6.25        | .119    | 7.97                 | .054    |
| <i>Main variables</i>                               |               |         |             |         |             |         |                      |         |
| No use flexible work/flexitime in either wave (ref) |               |         |             |         |             |         |                      |         |
| Use flexible work/flexitime in wave 4 only          | -3.53         | <.001   | –           | –       |             |         | –                    | –       |
| Use flexible work/flexitime in wave 2 only          | 0.10          | .941    | -0.07       | .953    |             |         | -0.29                | .831    |
| Use flexible work/flexitime in both waves           | -1.60         | .020    | -2.09       | .007    |             |         | -2.44                | .010    |
| No use telework in either wave (ref)                |               |         |             |         |             |         |                      |         |
| Use telework in wave 4 only                         |               |         |             |         | -1.75       | .058    | -1.17                | .289    |
| Use telework in wave 2 only                         |               |         |             |         | –           | –       | –                    | –       |
| Use telework in both waves                          |               |         |             |         | -0.34       | .810    | 0.70                 | .629    |
| <i>Control variables</i>                            |               |         |             |         |             |         |                      |         |
| Works small part-time (<16 hours/week) wave 2       | –             | –       | –           | –       | –           | –       | –                    | –       |
| Works large part-time (16–34 hours/week) wave 2     | -1.77         | .053    | -1.61       | .067    | -1.10       | .212    | -1.39                | .126    |
| Works full-time (35–47 hours/week) wave 2 (ref)     |               |         |             |         |             |         |                      |         |
| Works long hours (48 hours/week or more) wave 2     | 5.37          | <.001   | 4.81        | .004    | 5.10        | .001    | 5.02                 | .002    |
| Age wave 4                                          | -0.12         | .123    | -0.09       | .239    | -0.12       | .097    | -0.07                | .358    |
| Age youngest child                                  |               |         |             |         |             |         |                      |         |
| 0 wave 4 (ref)                                      |               |         |             |         |             |         |                      |         |
| 1 wave 4                                            | 1.70          | .018    | 1.92        | .006    | 1.58        | .025    | 1.80                 | .011    |
| 2 wave 4                                            | 3.64          | .027    | 4.02        | .016    | 3.30        | .040    | 4.12                 | .021    |
| Gender attitude wave 2                              | 0.06          | .897    | 0.09        | .840    | 0.00        | .990    | 0.21                 | .623    |
| Having a degree wave 4                              | -0.90         | .209    | -0.77       | .305    | -1.00       | .174    | -0.60                | .435    |
| Working in private sector wave 4                    | 0.70          | .303    | 0.53        | .433    | 0.99        | .159    | 0.67                 | .350    |
| Union present wave 4                                | -0.65         | .437    | -0.62       | .432    | -0.30       | .670    | -0.44                | .568    |
| Occupational level wave 4                           |               |         |             |         |             |         |                      |         |
| Management / professional (ref)                     |               |         |             |         |             |         |                      |         |
| Skilled work                                        | -0.49         | .508    | -0.32       | .667    | 0.02        | .981    | -0.20                | .795    |
| Partly skilled or unskilled work                    | -0.38         | .717    | -0.07       | .945    | 0.01        | .996    | -0.04                | .966    |
| Log corrected wage wave 4                           | 0.02          | .982    | -0.06       | .942    | 0.44        | .548    | -0.21                | .795    |
| Living with partner wave 4                          | -4.50         | .006    | -4.88       | .007    | -4.08       | .032    | -5.12                | .009    |
| Partner employed wave 4                             | 5.06          | <.001   | 4.77        | <.001   | 4.39        | <.001   | 4.84                 | <.001   |
| Partner self-employed wave 4                        | 4.13          | .003    | 3.23        | .020    | 3.12        | .029    | 3.18                 | .027    |
| Partner work hours wave 4                           | 0.00          | .962    | -0.02       | .561    | 0.01        | .859    | -0.02                | .672    |
| Partner log earnings wave 4                         | -0.17         | .643    | -0.22       | .550    | -0.45       | .250    | -0.35                | .403    |
| Partner uses flexible work wave 4                   | -2.06         | .010    | -1.97       | .012    | -1.99       | .003    | -1.77                | .016    |
| Pseudo R <sup>2</sup>                               | 0.33          |         | 0.30        |         | 0.27        |         | 0.32                 |         |

*Source:* Understanding Society waves 2–4. *Note:* n=117 for flexible work; 115 for flexitime; 114 for telework; 112 for flexitime and telework. There are no women who works in a small part-time job in wave 2 in this sample.

### **3.4 Influential cases**

When looking at Cook's distance and standardized residuals, a couple of cases pop up as particularly influential. To test whether the results are not due to these cases only, we dropped these cases and re-ran the model. We only did this for the final model with flexitime and telework and for reduction of hours to see to what degree our conclusions remained. We also did this only for the total sample, as we already ran into sample size issues with the sub-sample of only having one child in the household. In total 6 cases were dropped due to a high Cook's distance for the model of (perceived) access to flexitime/telework and 7 cases for the model of use flexitime/telework. The models show that our results are not due to a few influential cases.

**Table A3–21: (Perceived) Access to flexitime/telework**

|                                                 | Coefficient | p-value |
|-------------------------------------------------|-------------|---------|
| Constant                                        | 2.93        | .245    |
| <i>Main variable</i>                            |             |         |
| No access to flexitime in either wave (ref)     |             |         |
| Access to flexitime in wave 4 only              | 0.48        | .372    |
| Access to flexitime in wave 2 only              | 0.38        | .484    |
| Access to flexitime in both waves               | 0.05        | .913    |
| No access to telework in either wave (ref)      |             |         |
| Access to telework in wave 4 only               | –1.69       | .016    |
| Access to telework in wave 2 only               | 0.68        | .527    |
| Access to telework in both waves                | –1.53       | .009    |
| <i>Control variables</i>                        |             |         |
| Works small part-time (<16 hours/week) wave 2   | –2.90       | .016    |
| Works large part-time (16–34 hours/week) wave 2 | –1.71       | <.001   |
| Works full-time (35–47 hours/week) wave 2 (ref) |             |         |
| Works long hours (48 hours/week or more) wave 2 | 2.70        | .007    |
| Age wave 4                                      | –0.03       | .466    |
| Age youngest child                              |             |         |
| 0 wave 4 (ref)                                  |             |         |
| 1 wave 4                                        | 1.02        | .016    |
| 2 wave 4                                        | 2.42        | .003    |
| Total number of children in household           |             |         |
| 1 wave 4 (ref)                                  |             |         |
| 2 wave 4                                        | –1.73       | <.001   |
| 3 or more wave 4                                | –1.49       | .008    |
| Gender attitude wave 2                          | –0.25       | .213    |
| Having a degree wave 4                          | –0.89       | .050    |
| Working in private sector wave 4                | 1.03        | .021    |
| Union present wave 4                            | 0.37        | .380    |
| Occupational level wave 4                       |             |         |
| Management / professional (ref)                 |             |         |
| Skilled work                                    | –1.33       | .007    |
| Partly skilled or unskilled work                | –0.26       | .677    |
| Log corrected wage wave 4                       | 0.23        | .615    |
| Living with partner wave 4                      | –4.85       | <.001   |
| Partner employed wave 4                         | 3.84        | <.001   |
| Partner self-employed wave 4                    | 4.50        | <.001   |
| Partner work hours wave 4                       | –0.03       | .121    |
| Partner log earnings wave 4                     | 0.10        | .706    |
| Partner uses flexible work wave 4               | –0.67       | .121    |
| Pseudo R <sup>2</sup>                           | 0.36        |         |

Source: Understanding Society waves 2–4. Note: n=266

**Table A3–22: Use flexitime/telework**

|                                                 | Coefficient | p-value |
|-------------------------------------------------|-------------|---------|
| Constant                                        | 5.87        | .015    |
| <i>Main variable</i>                            |             |         |
| Not using flexitime in either wave (ref)        |             |         |
| Using flexitime in wave 4 only                  | –           | –       |
| Using flexitime in wave 2 only                  | –0.55       | .385    |
| Using flexitime in both waves                   | –2.36       | .001    |
| Not using telework in either wave (ref)         |             |         |
| Using telework in wave 4 only                   | –1.15       | .345    |
| Using telework in wave 2 only                   | –           | –       |
| Using telework in both waves                    | –1.44       | .097    |
| <i>Control variables</i>                        |             |         |
| Works small part-time (<16 hours/week) wave 2   | –1.62       | .085    |
| Works large part-time (16–34 hours/week) wave 2 | –1.20       | .002    |
| Works full-time (35–47 hours/week) wave 2 (ref) |             |         |
| Works long hours (48 hours/week or more) wave 2 | 1.83        | .041    |
| Age wave 4                                      | 0.01        | .880    |
| Age youngest child                              |             |         |
| 0 wave 4 (ref)                                  |             |         |
| 1 wave 4                                        | 0.85        | .040    |
| 2 wave 4                                        | 1.85        | .020    |
| Total number of children in household           |             |         |
| 1 wave 4 (ref)                                  |             |         |
| 2 wave 4                                        | –1.66       | <.001   |
| 3 or more wave 4                                | –1.60       | .003    |
| Gender attitude wave 2                          | –0.02       | .925    |
| Having a degree wave 4                          | –0.49       | .246    |
| Working in private sector wave 4                | 0.96        | .034    |
| Union present wave 4                            | 0.17        | .685    |
| Occupational level wave 4                       |             |         |
| Management / professional (ref)                 |             |         |
| Skilled work                                    | –1.41       | .004    |
| Partly skilled or unskilled work                | –0.65       | .272    |
| Log corrected wage wave 4                       | 0.07        | .859    |
| Living with partner wave 4                      | –1.86       | .016    |
| Partner employed wave 4                         | 1.01        | .061    |
| Partner work hours wave 4                       | –0.03       | .199    |
| Partner log earnings wave 4                     | –0.39       | .039    |
| Partner uses flexible work wave 4               | –0.69       | .104    |
| Pseudo R <sup>2</sup>                           | 0.31        |         |

*Source:* Understanding Society waves 2–4. *Note:* n=249. 13 cases were dropped because using flexitime in wave 4 only now perfectly predicted whether someone reduced their working hours. Similarly, 3 cases were dropped because using telework in wave 2 only now perfectly predicted whether someone reduced their working hours. Whether the partner was self-employed was deleted because this model with living with a partner, partner being employed, and partner being self-employed ran in numerical difficulties.

### 3.5 Same job as extra control variable – on imputed data

We also wanted to see to what degree our results could be explained by a change in jobs. This variable was not presented in the main paper as there were many missing values on this variable. Contact with the support desk taught us that this was due to an error in the routing. As a result, we felt we could impute the data and include this variable on imputed data. We see that also in this model, (perceived) access to telework in both waves was significantly and negatively related to the likelihood of reducing one’s working hours. In addition, the use of flexitime in both waves was also still significantly and negatively related to the likelihood of reducing one’s working hours. Hence, our main conclusions stand.

Before imputation, the variable looked as follows (on subsample of individuals who are employed in wave 4):

**Table A3–23: How many changed job?**

|               | Frequency | Percentage | Valid percentage |
|---------------|-----------|------------|------------------|
| Same job      | 264       | 64.2       | 87.7             |
| Not same job  | 37        | 9.0        | 12.3             |
| Missing value | 110       | 26.8       |                  |
| Total         | 411       |            |                  |

*Source:* Understanding Society waves 2–4.

**Table 3–24: logistic regression of the likelihood of reducing working hours on (perceived) access to flexible work**

|                                                           | Flexible work |         | Flexitime   |         | Telework    |         | Flexitime & Telework |         |
|-----------------------------------------------------------|---------------|---------|-------------|---------|-------------|---------|----------------------|---------|
|                                                           | Coefficient   | p-value | Coefficient | p-value | Coefficient | p-value | Coefficient          | p-value |
| Constant                                                  | 4.58          | .010    | 4.77        | .008    | 3.98        | .027    | 4.07                 | .027    |
| <i>Main variables</i>                                     |               |         |             |         |             |         |                      |         |
| No access to flexible work/flexitime in either wave (ref) |               |         |             |         |             |         |                      |         |
| Access to flexible work/flexitime in wave 4 only          | -0.11         | .783    | -0.10       | .797    |             |         | -0.02                | .995    |
| Access to flexible work/flexitime in wave 2 only          | 0.11          | .782    | -0.03       | .928    |             |         | 0.06                 | .889    |
| Access to flexible work/flexitime in both waves           | -0.48         | .096    | -0.46       | .126    |             |         | -0.09                | .794    |
| No access to telework in either wave (ref)                |               |         |             |         |             |         |                      |         |
| Access to telework in wave 4 only                         |               |         |             |         | -0.91       | .054    | -0.85                | .097    |
| Access to telework in wave 2 only                         |               |         |             |         | 0.30        | .647    | 0.34                 | .620    |
| Access to telework in both waves                          |               |         |             |         | -1.00       | .019    | -0.95                | .044    |
| <i>Control variables</i>                                  |               |         |             |         |             |         |                      |         |
| Works small part-time (<16 hours/week) wave 2             | -1.70         | .018    | -1.66       | .020    | -1.72       | .017    | -1.74                | .016    |
| Works large part-time (16–34 hours/week) wave 2           | -0.97         | .001    | -0.96       | .001    | -1.03       | .001    | -1.04                | .001    |
| Works full-time (35–47 hours/week) wave 2 (ref)           |               |         |             |         |             |         |                      |         |
| Works long hours (48 hours/week or more) wave 2           | 1.46          | .017    | 1.43        | .020    | 1.61        | .010    | 1.58                 | .012    |
| Not same job in wave 4                                    | -0.57         | .180    | -0.63       | .139    | -0.47       | .276    | -0.48                | .276    |
| Age wave 4                                                | 0.01          | .786    | 0.00        | .860    | 0.00        | .873    | 0.00                 | .868    |
| <i>Age youngest child</i>                                 |               |         |             |         |             |         |                      |         |
| 0 wave 4 (ref)                                            |               |         |             |         |             |         |                      |         |
| 1 wave 4                                                  | 0.09          | .760    | 0.09        | .753    | 0.09        | .759    | 0.10                 | .744    |
| 2 wave 4                                                  | 0.81          | .162    | 0.81        | .159    | 0.82        | .162    | 0.83                 | .159    |
| <i>Total number of children in household</i>              |               |         |             |         |             |         |                      |         |
| 1 wave 4 (ref)                                            |               |         |             |         |             |         |                      |         |
| 2 wave 4                                                  | -1.24         | <.001   | -1.23       | <.001   | -1.29       | <.001   | -1.29                | <.001   |
| 3 or more wave 4                                          | -1.36         | .001    | -1.38       | <.001   | -1.33       | .001    | -1.34                | .001    |
| Gender attitude wave 2                                    | -0.13         | .416    | -0.13       | .390    | -0.14       | .386    | -0.14                | .384    |
| Having a degree wave 4                                    | -0.19         | .520    | -0.23       | .438    | -0.22       | .475    | -0.22                | .471    |
| Working in private sector wave 4                          | 0.57          | .079    | 0.53        | .106    | 0.56        | .088    | 0.55                 | .099    |
| Union present wave 4                                      | 0.24          | .438    | 0.27        | .402    | 0.12        | .699    | 0.14                 | .670    |
| <i>Occupational level wave 4</i>                          |               |         |             |         |             |         |                      |         |
| Management / professional (ref)                           |               |         |             |         |             |         |                      |         |
| Skilled work                                              | -0.91         | .007    | -0.87       | .009    | -0.94       | .006    | -0.94                | .006    |
| Partly skilled or unskilled work                          | -0.03         | .941    | -0.01       | .989    | -0.05       | .907    | -0.06                | .895    |
| Log corrected wage wave 4                                 | -0.44         | .142    | -0.44       | .137    | -0.37       | .215    | -0.37                | .214    |
| Living with partner wave 4                                | -2.72         | .002    | -2.70       | .002    | -2.87       | .001    | -2.88                | .001    |
| Partner employed wave 4                                   | 2.12          | .005    | 2.06        | .006    | 2.27        | .003    | 2.26                 | .003    |
| Partner self-employed wave 4                              | 2.39          | .004    | 2.33        | .004    | 2.53        | .002    | 2.52                 | .003    |
| Partner work hours wave 4                                 | 0.00          | .824    | 0.00        | .913    | 0.00        | .839    | 0.00                 | .847    |
| Partner log earnings wave 4                               | -0.18         | .250    | -0.18       | .249    | -0.11       | .502    | -0.12                | .477    |
| Partner uses flexible work wave 4                         | -0.30         | .381    | -0.31       | .363    | -0.26       | .446    | -0.26                | .447    |

Source: Understanding Society waves 2–4. Note: n=395. Results based on 100 imputed datasets.

**Table 3–25: logistic regression of the likelihood of reducing working hours on use of flexible work**

|                                                     | Flexible work |         | Flexitime   |         | Telework    |         | Flexitime & Telework |         |
|-----------------------------------------------------|---------------|---------|-------------|---------|-------------|---------|----------------------|---------|
|                                                     | Coefficient   | p-value | Coefficient | p-value | Coefficient | p-value | Coefficient          | p-value |
| Constant                                            | 4.38          | .017    | 4.66        | .010    | 4.18        | .019    | 4.62                 | .012    |
| <i>Main variables</i>                               |               |         |             |         |             |         |                      |         |
| No use flexible work/flexitime in either wave (ref) |               |         |             |         |             |         |                      |         |
| Use flexible work/flexitime in wave 4 only          | –0.88         | .055    | –0.60       | .254    |             |         | –0.43                | .436    |
| Use flexible work/flexitime in wave 2 only          | –0.13         | .756    | –0.20       | .667    |             |         | –0.19                | .686    |
| Use flexible work/flexitime in both waves           | –1.77         | <.001   | –2.14       | <.001   |             |         | –2.07                | .001    |
| No use telework in either wave (ref)                |               |         |             |         |             |         |                      |         |
| Use telework in wave 4 only                         |               |         |             |         | –1.31       | .063    | –1.00                | .196    |
| Use telework in wave 2 only                         |               |         |             |         | 0.63        | .422    | 0.80                 | .309    |
| Use telework in both waves                          |               |         |             |         | –0.83       | .236    | –0.42                | .561    |
| <i>Control variables</i>                            |               |         |             |         |             |         |                      |         |
| Works small part-time (<16 hours/week) wave 2       | –1.62         | .025    | –1.60       | .026    | –1.62       | .025    | –1.62                | .025    |
| Works large part-time (16–34 hours/week) wave 2     | –0.98         | .001    | –0.95       | .002    | –0.93       | .002    | –0.95                | .002    |
| Works full-time (35–47 hours/week) wave 2 (ref)     |               |         |             |         |             |         |                      |         |
| Works long hours (48 hours/week or more) wave 2     | 1.43          | .022    | 1.28        | .038    | 1.67        | .008    | 1.37                 | .030    |
| Not same job in wave 4                              | –0.51         | .246    | –0.63       | .155    | –0.49       | .259    | –0.55                | .223    |
| Age wave 4                                          | 0.01          | .774    | 0.01        | .685    | 0.00        | .857    | 0.01                 | .694    |
| Age youngest child                                  |               |         |             |         |             |         |                      |         |
| 0 wave 4 (ref)                                      |               |         |             |         |             |         |                      |         |
| 1 wave 4                                            | 0.07          | .812    | 0.12        | .693    | 0.04        | .903    | 0.08                 | .792    |
| 2 wave 4                                            | 0.76          | .193    | 0.74        | .198    | 0.73        | .204    | 0.74                 | .203    |
| Total number of children in household               |               |         |             |         |             |         |                      |         |
| 1 wave 4 (ref)                                      |               |         |             |         |             |         |                      |         |
| 2 wave 4                                            | –1.37         | <.001   | –1.42       | <.001   | –1.26       | <.001   | –1.44                | <.001   |
| 3 or more wave 4                                    | –1.46         | <.001   | –1.57       | <.001   | –1.31       | <.001   | –1.56                | <.001   |
| Gender attitude wave 2                              | –0.08         | .618    | –0.07       | .684    | –0.14       | .380    | –0.07                | .654    |
| Having a degree wave 4                              | –0.11         | .721    | –0.16       | .588    | –0.22       | .467    | –0.17                | .587    |
| Working in private sector wave 4                    | 0.55          | .093    | 0.40        | .235    | 0.60        | .068    | 0.42                 | .214    |
| Union present wave 4                                | 0.16          | .624    | 0.21        | .504    | 0.15        | .643    | 0.18                 | .580    |
| Occupational level wave 4                           |               |         |             |         |             |         |                      |         |
| Management / professional (ref)                     |               |         |             |         |             |         |                      |         |
| Skilled work                                        | –0.95         | .006    | –0.86       | .012    | –0.90       | .008    | –0.88                | .011    |
| Partly skilled or unskilled work                    | –0.05         | .909    | 0.03        | .951    | 0.02        | .957    | 0.02                 | .968    |
| Log corrected wage wave 4                           | –0.41         | .179    | –0.44       | .142    | –0.40       | .180    | –0.43                | .160    |
| Living with partner wave 4                          | –2.75         | .002    | –2.83       | .001    | –2.67       | .002    | –2.88                | .001    |
| Partner employed wave 4                             | 2.27          | .003    | 2.17        | .004    | 2.19        | .004    | 2.29                 | .003    |
| Partner self-employed wave 4                        | 2.53          | .003    | 2.48        | .003    | 2.42        | .004    | 2.57                 | .002    |
| Partner work hours wave 4                           | –0.00         | .965    | –0.00       | .820    | 0.00        | .871    | –0.00                | .852    |
| Partner log earnings wave 4                         | –0.15         | .378    | –0.15       | .368    | –0.15       | .326    | –0.15                | .352    |
| Partner uses flexible work wave 4                   | –0.28         | .425    | –0.30       | .390    | –0.31       | .369    | –0.29                | .408    |

Source: Understanding Society waves 2–4. Note: n=395. Results based on 100 imputed datasets.



### **3.6 Reduction in working hours excluding overtime**

We also looked at reduction in working hours as dependent variable while excluding hours worked as overtime (recall that the original variable was a combination of normal working hours and usual number of hours of overtime). The tables on the next page show that (perceived) access to flexible work was not significantly related to a reduction in working hours if we looked only at normal working hours. However, the use of flexitime was still strongly related to a lower likelihood of reducing one's working hours after child birth.

**Table A3–26: logistic regression of the likelihood of reducing working hours on (perceived) access to flexible work**

|                                                           | Flexible work |         | Flexitime   |         | Telework    |         | Flexitime & Telework |         |
|-----------------------------------------------------------|---------------|---------|-------------|---------|-------------|---------|----------------------|---------|
|                                                           | Coefficient   | p-value | Coefficient | p-value | Coefficient | p-value | Coefficient          | p-value |
| Constant                                                  | 0.69          | .742    | 1.04        | .621    | 0.21        | .918    | 0.79                 | .713    |
| <i>Main variables</i>                                     |               |         |             |         |             |         |                      |         |
| No access to flexible work/flexitime in either wave (ref) |               |         |             |         |             |         |                      |         |
| Access to flexible work/flexitime in wave 4 only          | -1.01         | .054    | -0.45       | .361    |             |         | -0.39                | .434    |
| Access to flexible work/flexitime in wave 2 only          | -0.34         | .496    | -0.01       | .991    |             |         | 0.07                 | .879    |
| Access to flexible work/flexitime in both waves           | -0.88         | .017    | -0.79       | .035    |             |         | -0.55                | .208    |
| No access to telework in either wave (ref)                |               |         |             |         |             |         |                      |         |
| Access to telework in wave 4 only                         |               |         |             |         | -1.15       | .056    | -0.84                | .194    |
| Access to telework in wave 2 only                         |               |         |             |         | -0.07       | .935    | 0.07                 | .940    |
| Access to telework in both waves                          |               |         |             |         | -0.55       | .235    | -0.31                | .547    |
| <i>Control variables</i>                                  |               |         |             |         |             |         |                      |         |
| Works small part-time (<16 hours/week) wave 2             | -1.89         | .036    | -1.79       | .046    | -1.75       | .051    | -1.82                | .045    |
| Works large part-time (16–34 hours/week) wave 2           | -1.22         | .001    | -1.22       | .001    | -1.21       | .001    | -1.23                | .001    |
| Works full-time (35–47 hours/week) wave 2 (ref)           |               |         |             |         |             |         |                      |         |
| Works long hours (48 hours/week or more) wave 2           | -0.23         | .682    | -0.34       | .542    | -0.17       | .770    | -0.29                | .610    |
| Age wave 4                                                | 0.01          | .804    | 0.01        | .835    | 0.01        | .879    | 0.01                 | .887    |
| <i>Age youngest child</i>                                 |               |         |             |         |             |         |                      |         |
| 0 wave 4 (ref)                                            |               |         |             |         |             |         |                      |         |
| 1 wave 4                                                  | 0.91          | .019    | 0.91        | .019    | 0.84        | .027    | 0.89                 | .022    |
| 2 wave 4                                                  | 1.89          | .009    | 1.96        | .006    | 1.85        | .011    | 1.94                 | .008    |
| <i>Total number of children in household</i>              |               |         |             |         |             |         |                      |         |
| 1 wave 4 (ref)                                            |               |         |             |         |             |         |                      |         |
| 2 wave 4                                                  | -1.39         | <.001   | -1.41       | <.001   | -1.48       | <.001   | -1.45                | <.001   |
| 3 or more wave 4                                          | -1.48         | .004    | -1.51       | .003    | -1.41       | .006    | -1.47                | .005    |
| Gender attitude wave 2                                    | 0.01          | .953    | -0.03       | .891    | -0.02       | .904    | -0.03                | .874    |
| Having a degree wave 4                                    | -1.14         | .006    | -1.20       | .004    | -1.19       | .004    | -1.21                | .004    |
| Working in private sector wave 4                          | 0.70          | .077    | 0.54        | .166    | 0.63        | .107    | 0.57                 | .150    |
| Union present wave 4                                      | -0.22         | .570    | -0.14       | .709    | -0.23       | .547    | -0.18                | .632    |
| <i>Occupational level wave 4</i>                          |               |         |             |         |             |         |                      |         |
| Management / professional (ref)                           |               |         |             |         |             |         |                      |         |
| Skilled work                                              | -0.86         | .051    | -0.86       | .048    | -0.91       | .037    | -0.90                | .041    |
| Partly skilled or unskilled work                          | -0.26         | .650    | -0.26       | .652    | -0.15       | .786    | -0.28                | .625    |
| Log corrected wage wave 4                                 | 0.84          | .050    | 0.79        | .065    | 0.82        | .054    | 0.82                 | .057    |
| Living with partner wave 4                                | -3.39         | .001    | -3.32       | .001    | -3.21       | .001    | -3.36                | .001    |
| Partner employed wave 4                                   | 1.92          | .021    | 1.76        | .029    | 1.77        | .031    | 1.83                 | .025    |
| Partner self-employed wave 4                              | 0.24          | .654    | 0.27        | .612    | 0.34        | .520    | 0.29                 | .584    |
| Partner work hours wave 4                                 | 0.01          | .385    | 0.01        | .472    | 0.01        | .506    | 0.01                 | .511    |
| Partner log earnings wave 4                               | -0.26         | .114    | -0.26       | .105    | -0.18       | .275    | -0.22                | .182    |
| Partner uses flexible work wave 4                         | -0.11         | .769    | -0.10       | .796    | -0.11       | .781    | -0.09                | .806    |
| Pseudo R <sup>2</sup>                                     | 0.26          |         | 0.26        |         | 0.25        |         | 0.26                 |         |

Source: Understanding Society waves 2–4. Note: n=272.

**Table 3–27: logistic regression of the likelihood of reducing working hours on use of flexible work**

|                                                     | Flexible work |         | Flexitime   |         | Telework    |         | Flexitime & Telework |         |
|-----------------------------------------------------|---------------|---------|-------------|---------|-------------|---------|----------------------|---------|
|                                                     | Coefficient   | p-value | Coefficient | p-value | Coefficient | p-value | Coefficient          | p-value |
| Constant                                            | 0.68          | .756    | 0.71        | .739    | 0.02        | .991    | 0.57                 | .794    |
| <i>Main variables</i>                               |               |         |             |         |             |         |                      |         |
| No use flexible work/flexitime in either wave (ref) |               |         |             |         |             |         |                      |         |
| Use flexible work/flexitime in wave 4 only          | -1.68         | .018    | -2.08       | .067    |             |         | -1.95                | .093    |
| Use flexible work/flexitime in wave 2 only          | -1.06         | .046    | -0.67       | .222    |             |         | -0.67                | .231    |
| Use flexible work/flexitime in both waves           | -1.75         | .001    | -1.90       | .004    |             |         | -1.82                | .008    |
| No use telework in either wave (ref)                |               |         |             |         |             |         |                      |         |
| Use telework in wave 4 only                         |               |         |             |         | -1.43       | .111    | -0.83                | .397    |
| Use telework in wave 2 only                         |               |         |             |         | 0.44        | .716    | 0.92                 | .462    |
| Use telework in both waves                          |               |         |             |         | -1.05       | .178    | -0.61                | .441    |
| <i>Control variables</i>                            |               |         |             |         |             |         |                      |         |
| Works small part-time (<16 hours/week) wave 2       | -1.78         | .051    | -1.56       | .082    | -1.59       | .075    | -1.50                | .096    |
| Works large part-time (16–34 hours/week) wave 2     | -1.29         | .001    | -1.15       | .003    | -1.09       | .004    | -1.12                | .004    |
| Works full-time (35–47 hours/week) wave 2 (ref)     |               |         |             |         |             |         |                      |         |
| Works long hours (48 hours/week or more) wave 2     | -0.13         | .830    | -0.48       | .398    | -0.02       | .975    | -0.40                | .497    |
| Age wave 4                                          | 0.01          | .884    | 0.02        | .636    | 0.00        | .933    | 0.01                 | .711    |
| Age youngest child                                  |               |         |             |         |             |         |                      |         |
| 0 wave 4 (ref)                                      |               |         |             |         |             |         |                      |         |
| 1 wave 4                                            | 0.89          | .025    | 0.91        | .020    | 0.74        | .053    | 0.82                 | .038    |
| 2 wave 4                                            | 1.88          | .013    | 1.83        | .011    | 1.74        | .015    | 1.80                 | .014    |
| Total number of children in household               |               |         |             |         |             |         |                      |         |
| 1 wave 4 (ref)                                      |               |         |             |         |             |         |                      |         |
| 2 wave 4                                            | -1.48         | <.001   | -1.60       | <.001   | -1.44       | <.001   | -1.62                | <.001   |
| 3 or more wave 4                                    | -1.37         | .009    | -1.68       | .001    | -1.32       | .010    | -1.59                | .003    |
| Gender attitude wave 2                              | 0.07          | .716    | 0.06        | .731    | -0.01       | .960    | 0.07                 | .726    |
| Having a degree wave 4                              | -1.11         | .009    | -1.15       | .006    | -1.12       | .006    | -1.14                | .007    |
| Working in private sector wave 4                    | 0.65          | .108    | 0.46        | .250    | 0.70        | .078    | 0.54                 | .191    |
| Union present wave 4                                | -0.34         | .388    | -0.26       | .501    | -0.27       | .475    | -0.28                | .473    |
| Occupational level wave 4                           |               |         |             |         |             |         |                      |         |
| Management / professional (ref)                     |               |         |             |         |             |         |                      |         |
| Skilled work                                        | -1.03         | .024    | -0.85       | .058    | -0.90       | .040    | -0.88                | .054    |
| Partly skilled or unskilled work                    | -0.29         | .618    | -0.19       | .746    | -0.11       | .841    | -0.21                | .715    |
| Log corrected wage wave 4                           | 0.83          | .063    | 0.79        | .069    | 0.84        | .053    | 0.83                 | .059    |
| Living with partner wave 4                          | -3.25         | .001    | -3.20       | .001    | -2.94       | .003    | -3.08                | .002    |
| Partner employed wave 4                             | 1.87          | .022    | 1.67        | .039    | 1.65        | .043    | 1.67                 | .041    |
| Partner self-employed wave 4                        | 0.41          | .460    | 0.37        | .499    | 0.36        | .498    | 0.40                 | .474    |
| Partner work hours wave 4                           | 0.01          | .541    | 0.01        | .634    | 0.01        | .495    | 0.01                 | .648    |
| Partner log earnings wave 4                         | -0.21         | .203    | -0.23       | .167    | -0.19       | .224    | -0.23                | .178    |
| Partner uses flexible work wave 4                   | -0.07         | .866    | -0.03       | .929    | -0.11       | .777    | -0.02                | .951    |
| Pseudo R <sup>2</sup>                               | 0.29          |         | 0.28        |         | 0.25        |         | 0.29                 |         |

Source: Understanding Society waves 2–4. Note: n=272.

### **3.7 Not having cut-off of 70 hours/week for working hours**

In this robustness check we look at the consequence of having an upper limit of working 70 hours/week and then looking at a reduction of working hours. Although we believe that 70 hours is about the maximum someone would work regularly per week (which already amounts to 10 hours/day, 7 days/week), we repeated the analyses without this top coding. The tables on the next pages show that when we release this maximum of working 70 hours/week for the respondent, our conclusions remain.

**Table A3–28: logistic regression of the likelihood of being employed on (perceived) access to flexible work – no upper limit working hours**

|                                                   | Flexible work |         | Flexitime   |         | Telework    |         |
|---------------------------------------------------|---------------|---------|-------------|---------|-------------|---------|
|                                                   | Coefficient   | p-value | Coefficient | p-value | Coefficient | p-value |
| Constant                                          | 1.14          | .607    | 1.12        | .617    | 1.44        | .524    |
| <i>Main variables</i>                             |               |         |             |         |             |         |
| Access to flexible work/flexitime/telework wave 2 | 0.17          | .580    | 0.20        | .548    | 0.45        | .383    |
| <i>Control variables</i>                          |               |         |             |         |             |         |
| Age wave 4                                        | 0.04          | .235    | 0.04        | .244    | 0.04        | .225    |
| Age youngest child                                |               |         |             |         |             |         |
| 0 wave 4 (ref)                                    |               |         |             |         |             |         |
| 1 wave 4                                          | 1.05          | .002    | 1.08        | .001    | 1.10        | .001    |
| Total number of children in household             |               |         |             |         |             |         |
| 1 wave 4 (ref)                                    |               |         |             |         |             |         |
| 2 wave 4                                          | 0.25          | .528    | 0.27        | .508    | 0.26        | .520    |
| 3 or more wave 4                                  | –0.53         | .252    | –0.50       | .267    | –0.57       | .221    |
| Gender attitude wave 2                            | 0.37          | .020    | 0.37        | .019    | 0.37        | .019    |
| Having a degree wave 4                            | –0.16         | .670    | –0.16       | .671    | –0.20       | .601    |
| Works small part-time (<16 hours/week) wave 2     | –1.04         | .062    | –1.05       | .060    | –1.02       | .069    |
| Works large part-time (16–34 hours/week) wave 2   | 0.06          | .875    | 0.06        | .877    | 0.07        | .864    |
| Works full-time (35–47 hours/week) wave 2 (ref)   |               |         |             |         |             |         |
| Works long hours (48 hours/week or more) wave 2   | 0.06          | .924    | 0.08        | .909    | 0.04        | .946    |
| Working in private sector wave 2                  | –0.70         | .101    | –0.68       | .109    | –0.72       | .094    |
| Union present wave 2                              | 0.66          | .085    | 0.65        | .090    | 0.67        | .079    |
| Occupational level wave 2                         |               |         |             |         |             |         |
| Management / professional (ref)                   |               |         |             |         |             |         |
| Skilled work                                      | 0.13          | .768    | 0.11        | .795    | 0.15        | .736    |
| Partly skilled or unskilled work                  | –0.71         | .169    | –0.73       | .160    | –0.70       | .176    |
| Log corrected wage wave 2                         | –0.13         | .738    | –0.12       | .759    | –0.19       | .638    |
| Living with partner wave 4                        | 0.16          | .816    | 0.16        | .815    | 0.14        | .840    |
| Partner employed wave 4                           | 0.37          | .551    | 0.38        | .538    | 0.39        | .528    |
| Partner self-employed wave 4                      | 0.77          | .372    | 0.79        | .355    | 0.76        | .372    |
| Partner work hours wave 4                         | –0.02         | .290    | –0.02       | .296    | –0.02       | .275    |
| Partner log earnings wave 4                       | –0.10         | .709    | –0.10       | .703    | –0.11       | .692    |
| Partner uses flexible work wave 4                 | 0.70          | .117    | 0.69        | .122    | 0.71        | .112    |
| Pseudo R <sup>2</sup>                             | 0.20          |         | 0.20        |         | 0.20        |         |

*Source:* Understanding Society waves 2–4. *Note:* n=335. There were few respondents with a child aged 2 and these respondents did not differ in the dependent variable. As a result, these were excluded from this analysis.

**Table A3–29: logistic regression of the likelihood of being employed on use flexible work – no upper limit working hours**

|                                                 | Flexible work |         | Flexitime   |         | Telework    |         |
|-------------------------------------------------|---------------|---------|-------------|---------|-------------|---------|
|                                                 | Coefficient   | p-value | Coefficient | p-value | Coefficient | p-value |
| Constant                                        | 1.32          | .556    | 1.15        | .605    | 1.52        | .501    |
| <i>Main variables</i>                           |               |         |             |         |             |         |
| Use flexible work/flexitime/telework wave 2     | 0.45          | .301    | 0.39        | .481    | 0.75        | .296    |
| <i>Control variables</i>                        |               |         |             |         |             |         |
| Age wave 4                                      | 0.04          | .208    | 0.04        | .244    | 0.04        | .208    |
| Age youngest child                              |               |         |             |         |             |         |
| 0 wave 4 (ref)                                  |               |         |             |         |             |         |
| 1 wave 4                                        | 1.08          | .001    | 1.08        | .001    | 1.10        | .001    |
| Total number of children in household           |               |         |             |         |             |         |
| 1 wave 4 (ref)                                  |               |         |             |         |             |         |
| 2 wave 4                                        | 0.26          | .525    | 0.27        | .496    | 0.26        | .525    |
| 3 or more wave 4                                | –0.59         | .203    | –0.49       | .280    | –0.60       | .202    |
| Gender attitude wave 2                          | 0.37          | .021    | 0.37        | .020    | 0.38        | .018    |
| Having a degree wave 4                          | –0.17         | .648    | –0.15       | .683    | –0.17       | .645    |
| Works small part-time (<16 hours/week) wave 2   | –1.06         | .059    | –1.04       | .065    | –1.05       | .063    |
| Works large part-time (16–34 hours/week) wave 2 | 0.01          | .975    | 0.04        | .916    | 0.04        | .910    |
| Works full-time (35–47 hours/week) wave 2 (ref) |               |         |             |         |             |         |
| Works long hours (48 hours/week or more) wave 2 | 0.00          | .998    | 0.04        | .949    | –0.02       | .977    |
| Working in private sector wave 2                | –0.70         | .102    | –0.67       | .113    | –0.73       | .089    |
| Union present wave 2                            | 0.74          | .057    | 0.67        | .078    | 0.70        | .067    |
| Occupational level wave 2                       |               |         |             |         |             |         |
| Management / professional (ref)                 |               |         |             |         |             |         |
| Skilled work                                    | 0.17          | .700    | 0.15        | .733    | 0.14        | .749    |
| Partly skilled or unskilled work                | –0.65         | .213    | –0.70       | .181    | –0.70       | .179    |
| Log corrected wage wave 2                       | –0.16         | .681    | –0.11       | .778    | –0.19       | .625    |
| Living with partner wave 4                      | 0.17          | .804    | 0.17        | .806    | 0.11        | .877    |
| Partner employed wave 4                         | 0.38          | .542    | 0.39        | .523    | 0.41        | .508    |
| Partner self-employed wave 4                    | 0.75          | .383    | 0.76        | .375    | 0.80        | .348    |
| Partner work hours wave 4                       | –0.02         | .279    | –0.02       | .300    | –0.02       | .260    |
| Partner log earnings wave 4                     | –0.12         | .652    | –0.11       | .664    | –0.11       | .671    |
| Partner uses flexible work wave 4               | 0.70          | .118    | 0.71        | .112    | 0.72        | .109    |
| Pseudo R <sup>2</sup>                           | 0.20          |         | 0.20        |         | 0.20        |         |

*Source:* Understanding Society waves 2–4. *Note:* n=335. There were few respondents with a child aged 2 and these respondents did not differ in the dependent variable. As a result, these were excluded from this analysis.

**Table A3–30: logistic regression of the likelihood of reducing working hours on (perceived) access to flexible work– no upper limit working hours**

|                                                           | Flexible work |         | Flexitime   |         | Telework    |         | Flexitime & Telework |         |
|-----------------------------------------------------------|---------------|---------|-------------|---------|-------------|---------|----------------------|---------|
|                                                           | Coefficient   | p-value | Coefficient | p-value | Coefficient | p-value | Coefficient          | p-value |
| Constant                                                  | 5.53          | .010    | 5.54        | .011    | 4.86        | .024    | 4.64                 | .036    |
| <i>Main variables</i>                                     |               |         |             |         |             |         |                      |         |
| No access to flexible work/flexitime in either wave (ref) |               |         |             |         |             |         |                      |         |
| Access to flexible work/flexitime in wave 4 only          | –0.39         | .462    | 0.09        | .860    |             |         | 0.15                 | .776    |
| Access to flexible work/flexitime in wave 2 only          | –0.36         | .458    | 0.00        | .994    |             |         | 0.15                 | .755    |
| Access to flexible work/flexitime in both waves           | –0.70         | .065    | –0.43       | .257    |             |         | 0.19                 | .675    |
| No access to telework in either wave (ref)                |               |         |             |         |             |         |                      |         |
| Access to telework in wave 4 only                         |               |         |             |         | –1.36       | .022    | –1.47                | .025    |
| Access to telework in wave 2 only                         |               |         |             |         | –0.39       | .650    | –0.45                | .608    |
| Access to telework in both waves                          |               |         |             |         | –1.07       | .029    | –1.15                | .035    |
| <i>Control variables</i>                                  |               |         |             |         |             |         |                      |         |
| Works small part-time (<16 hours/week) wave 2             | –2.26         | .012    | –2.15       | .017    | –2.27       | .013    | –2.28                | .013    |
| Works large part-time (16–34 hours/week) wave 2           | –1.42         | <.001   | –1.40       | <.001   | –1.48       | <.001   | –1.48                | <.001   |
| Works full-time (35–47 hours/week) wave 2 (ref)           |               |         |             |         |             |         |                      |         |
| Works long hours (48 hours/week or more) wave 2           | 1.75          | .025    | 1.74        | .028    | 1.87        | .017    | 1.93                 | .017    |
| Age wave 4                                                | –0.03         | .461    | –0.02       | .509    | –0.03       | .455    | –0.03                | .469    |
| Age youngest child                                        |               |         |             |         |             |         |                      |         |
| 0 wave 4 (ref)                                            |               |         |             |         |             |         |                      |         |
| 1 wave 4                                                  | 0.92          | .019    | 0.89        | .022    | 0.86        | .026    | 0.86                 | .027    |
| 2 wave 4                                                  | 1.60          | .025    | 1.62        | .022    | 1.61        | .026    | 1.60                 | .028    |
| Total number of children in household                     |               |         |             |         |             |         |                      |         |
| 1 wave 4 (ref)                                            |               |         |             |         |             |         |                      |         |
| 2 wave 4                                                  | –1.45         | <.001   | –1.46       | <.001   | –1.55       | <.001   | –1.56                | <.001   |
| 3 or more wave 4                                          | –1.15         | .022    | –1.17       | .020    | –1.09       | .033    | –1.08                | .036    |
| Gender attitude wave 2                                    | –0.29         | .113    | –0.31       | .091    | –0.30       | .105    | –0.30                | .109    |
| Having a degree wave 4                                    | –0.69         | .082    | –0.73       | .068    | –0.66       | .107    | –0.66                | .111    |
| Working in private sector wave 4                          | 0.58          | .143    | 0.47        | .240    | 0.61        | .130    | 0.62                 | .130    |
| Union present wave 4                                      | 0.20          | .606    | 0.22        | .572    | 0.15        | .702    | 0.13                 | .739    |
| Occupational level wave 4                                 |               |         |             |         |             |         |                      |         |
| Management / professional (ref)                           |               |         |             |         |             |         |                      |         |
| Skilled work                                              | –1.09         | .012    | –1.09       | .011    | –1.18       | .008    | –1.19                | .008    |
| Partly skilled or unskilled work                          | –0.52         | .362    | –0.44       | .434    | –0.50       | .375    | –0.46                | .423    |
| Log corrected wage wave 4                                 | –0.20         | .615    | –0.25       | .532    | –0.14       | .737    | –0.13                | .753    |
| Living with partner wave 4                                | –3.98         | <.001   | –3.88       | <.001   | –4.08       | <.001   | –4.07                | <.001   |
| Partner employed wave 4                                   | 3.09          | .001    | 2.95        | .001    | 3.22        | <.001   | 3.22                 | .001    |
| Partner self-employed wave 4                              | 3.49          | .001    | 3.36        | .001    | 3.64        | <.001   | 3.65                 | .001    |
| Partner work hours wave 4                                 | –0.00         | .767    | –0.01       | .671    | –0.01       | .707    | –0.01                | .704    |
| Partner log earnings wave 4                               | –0.16         | .347    | 0.15        | .357    | –0.09       | .589    | –0.08                | .641    |
| Partner uses flexible work wave 4                         | –0.68         | .081    | –0.67       | .085    | –0.66       | .096    | –0.66                | .095    |
| Pseudo R <sup>2</sup>                                     | 0.28          |         | 0.27        |         | 0.29        |         | 0.29                 |         |

Source: Understanding Society waves 2–4. Note: n=272.

**Table A3–31: logistic regression of the likelihood of reducing working hours on use of flexible work– no upper limit working hours**

|                                                     | Flexible work |         | Flexitime   |         | Telework    |         | Flexitime & Telework |         |
|-----------------------------------------------------|---------------|---------|-------------|---------|-------------|---------|----------------------|---------|
|                                                     | Coefficient   | p-value | Coefficient | p-value | Coefficient | p-value | Coefficient          | p-value |
| Constant                                            | 5.82          | .011    | 5.63        | .011    | 4.86        | .023    | 5.57                 | .013    |
| <i>Main variables</i>                               |               |         |             |         |             |         |                      |         |
| No use flexible work/flexitime in either wave (ref) |               |         |             |         |             |         |                      |         |
| Use flexible work/flexitime in wave 4 only          | –1.89         | .012    | –1.26       | .157    |             |         | –1.04                | .268    |
| Use flexible work/flexitime in wave 2 only          | –0.77         | .157    | –0.38       | .498    |             |         | –0.34                | .547    |
| Use flexible work/flexitime in both waves           | –1.82         | .001    | –2.12       | .001    |             |         | –2.06                | .003    |
| No use telework in either wave (ref)                |               |         |             |         |             |         |                      |         |
| Use telework in wave 4 only                         |               |         |             |         | –1.61       | .080    | –1.19                | .264    |
| Use telework in wave 2 only                         |               |         |             |         | –0.13       | .915    | 0.32                 | .804    |
| Use telework in both waves                          |               |         |             |         | –0.78       | .326    | –0.27                | .740    |
| <i>Control variables</i>                            |               |         |             |         |             |         |                      |         |
| Works small part-time (<16 hours/week) wave 2       | –2.25         | .015    | –2.01       | .026    | –2.06       | .023    | –1.98                | .028    |
| Works large part-time (16–34 hours/week) wave 2     | –1.49         | <.001   | –1.36       | <.001   | –1.30       | .001    | –1.33                | .001    |
| Works full-time (35–47 hours/week) wave 2 (ref)     |               |         |             |         |             |         |                      |         |
| Works long hours (48 hours/week or more) wave 2     | 1.85          | .019    | 1.50        | .059    | 2.06        | .009    | 1.61                 | .046    |
| Age wave 4                                          | –0.03         | .421    | –0.01       | .686    | –0.03       | .442    | –0.02                | .643    |
| Age youngest child                                  |               |         |             |         |             |         |                      |         |
| 0 wave 4 (ref)                                      |               |         |             |         |             |         |                      |         |
| 1 wave 4                                            | 0.89          | .026    | 0.91        | .022    | 0.75        | .052    | 0.84                 | .035    |
| 2 wave 4                                            | 1.59          | .032    | 1.50        | .034    | 1.45        | .039    | 1.47                 | .040    |
| Total number of children in household               |               |         |             |         |             |         |                      |         |
| 1 wave 4 (ref)                                      |               |         |             |         |             |         |                      |         |
| 2 wave 4                                            | –1.53         | <.001   | –1.67       | <.001   | –1.47       | <.001   | –1.70                | <.001   |
| 3 or more wave 4                                    | –1.11         | .032    | –1.39       | .008    | –1.07       | .034    | –1.37                | .009    |
| Gender attitude wave 2                              | –0.23         | .238    | –0.22       | .251    | –0.29       | .115    | –0.21                | .265    |
| Having a degree wave 4                              | –0.62         | .138    | –0.66       | .105    | –0.63       | .110    | –0.63                | .125    |
| Working in private sector wave 4                    | 0.60          | .140    | 0.34        | .408    | 0.64        | .111    | 0.41                 | .332    |
| Union present wave 4                                | 0.12          | .762    | 0.16        | .684    | 0.12        | .754    | 0.14                 | .718    |
| Occupational level wave 4                           |               |         |             |         |             |         |                      |         |
| Management / professional (ref)                     |               |         |             |         |             |         |                      |         |
| Skilled work                                        | –1.32         | .004    | –1.11       | .014    | –1.14       | .009    | –1.15                | .013    |
| Partly skilled or unskilled work                    | –0.63         | .278    | –0.50       | .383    | –0.41       | .463    | –0.52                | .361    |
| Log corrected wage wave 4                           | –0.24         | .559    | –0.26       | .520    | –0.20       | .627    | –0.24                | .554    |
| Living with partner wave 4                          | –3.95         | <.001   | –3.97       | <.001   | –3.79       | <.001   | –3.95                | <.001   |
| Partner employed wave 4                             | 3.20          | <.001   | 3.00        | .001    | 3.03        | .001    | 3.06                 | .001    |
| Partner self-employed wave 4                        | 3.71          | <.001   | 3.45        | .001    | 3.48        | .001    | 3.50                 | .001    |
| Partner work hours wave 4                           | –0.01         | .588    | –0.01       | .496    | –0.01       | .676    | –0.01                | .489    |
| Partner log earnings wave 4                         | –0.13         | .467    | –0.13       | .449    | –0.10       | .525    | –0.12                | .468    |
| Partner uses flexible work wave 4                   | –0.63         | .123    | –0.65       | .109    | –0.67       | .092    | –0.64                | .114    |
| Pseudo R <sup>2</sup>                               | 0.32          |         | 0.30        |         | 0.28        |         | 0.31                 |         |

Source: Understanding Society waves 2–4. Note: n=272.



**Table A3–32: logistic regression of the likelihood of being employed on (perceived) access to flexible work – only first child– no upper limit working hours**

|                                                   | Flexible work |         | Flexitime   |         | Telework    |         |
|---------------------------------------------------|---------------|---------|-------------|---------|-------------|---------|
|                                                   | Coefficient   | p-value | Coefficient | p-value | Coefficient | p-value |
| Constant                                          | 2.56          | .628    | 2.71        | .618    | 3.04        | .574    |
| <i>Main variables</i>                             |               |         |             |         |             |         |
| Access to flexible work/flexitime/telework wave 2 | 0.94          | .095    | 1.06        | .086    | 1.64        | .150    |
| <i>Control variables</i>                          |               |         |             |         |             |         |
| Age wave 4                                        | –0.09         | .126    | –0.09       | .131    | –0.11       | .081    |
| Age youngest child                                |               |         |             |         |             |         |
| 0 wave 4 (ref)                                    |               |         |             |         |             |         |
| 1 wave 4                                          | 0.06          | .928    | 0.21        | .738    | 0.14        | .826    |
| Gender attitude wave 2                            | –0.12         | .703    | –0.08       | .807    | –0.04       | .902    |
| Having a degree wave 4                            | 0.13          | .837    | 0.20        | .755    | 0.27        | .674    |
| Works small part-time (<16 hours/week) wave 2     | –1.57         | .332    | –1.60       | .333    | –1.93       | .237    |
| Works large part-time (16–34 hours/week) wave 2   | 0.63          | .482    | 0.56        | .544    | 0.64        | .466    |
| Works full-time (35–47 hours/week) wave 2 (ref)   |               |         |             |         |             |         |
| Works long hours (48 hours/week or more) wave 2   | 0.63          | .483    | 0.57        | .520    | 0.67        | .457    |
| Working in private sector wave 2                  | –0.56         | .526    | –0.49       | .583    | –0.48       | .593    |
| Union present wave 2                              | 1.19          | .086    | 1.24        | .078    | 1.31        | .060    |
| Occupational level wave 2                         |               |         |             |         |             |         |
| Management / professional (ref)                   |               |         |             |         |             |         |
| Skilled work                                      | –0.45         | .535    | –0.46       | .530    | –0.14       | .842    |
| Partly skilled or unskilled work                  | –0.77         | .430    | –0.86       | .391    | –0.59       | .553    |
| Log corrected wage wave 2                         | –0.12         | .838    | –0.16       | .796    | –0.10       | .869    |
| Living with partner wave 4                        | 1.13          | .376    | 1.14        | .372    | 1.11        | .390    |
| Partner employed wave 4                           | 0.28          | .799    | 0.34        | .754    | 0.46        | .675    |
| Partner work hours wave 4                         | –0.01         | .744    | –0.01       | .885    | –0.01       | .812    |
| Partner log earnings wave 4                       | 0.13          | .860    | 0.06        | .933    | 0.07        | .922    |
| Partner uses flexible work wave 4                 | 0.64          | .386    | 0.67        | .365    | 0.68        | .349    |
| Pseudo R <sup>2</sup>                             | 0.23          |         | 0.24        |         | 0.23        |         |

*Source:* Understanding Society waves 2–4. *Note:* n=131. There were few respondents with a child aged 2 and these respondents did not differ in the dependent variable. Similarly, whether the partner was self-employed perfectly predicted the outcome variable. As a result, respondents with a child aged 2 or with a partner who was self-employed were excluded from this analysis.

**Table A3–33: logistic regression of the likelihood of being employed on use flexible work – only first child– no upper limit working hours**

|                                                 | Flexible work |         | Flexitime   |         | Telework    |         |
|-------------------------------------------------|---------------|---------|-------------|---------|-------------|---------|
|                                                 | Coefficient   | p-value | Coefficient | p-value | Coefficient | p-value |
| Constant                                        | 2.27          | .664    | 1.80        | .734    |             |         |
| <i>Main variables</i>                           |               |         |             |         |             |         |
| Use flexible work/flexitime/telework wave 2     | 1.12          | .199    | 1.84        | .110    | –           | –       |
| <i>Control variables</i>                        |               |         |             |         |             |         |
| Age wave 4                                      | –0.09         | .123    | –0.10       | .117    |             |         |
| Age youngest child                              |               |         |             |         |             |         |
| 0 wave 4 (ref)                                  |               |         |             |         |             |         |
| 1 wave 4                                        | 0.16          | .796    | 0.12        | .846    |             |         |
| Gender attitude wave 2                          | –0.09         | .788    | –0.11       | .733    |             |         |
| Having a degree wave 4                          | 0.26          | .688    | 0.27        | .685    |             |         |
| Works small part-time (<16 hours/week) wave 2   | –2.01         | .232    | –1.97       | .244    |             |         |
| Works large part-time (16–34 hours/week) wave 2 | 0.56          | .526    | 0.71        | .410    |             |         |
| Works full-time (35–47 hours/week) wave 2 (ref) |               |         |             |         |             |         |
| Works long hours (48 hours/week or more) wave 2 | 0.61          | .508    | 0.68        | .463    |             |         |
| Working in private sector wave 2                | –0.17         | .852    | 0.00        | .998    |             |         |
| Union present wave 2                            | 1.42          | .042    | 1.49        | .035    |             |         |
| Occupational level wave 2                       |               |         |             |         |             |         |
| Management / professional (ref)                 |               |         |             |         |             |         |
| Skilled work                                    | –0.40         | .580    | –0.49       | .508    |             |         |
| Partly skilled or unskilled work                | –0.56         | .567    | –0.62       | .533    |             |         |
| Log corrected wage wave 2                       | –0.07         | .906    | –0.06       | .923    |             |         |
| Living with partner wave 4                      | 1.11          | .381    | 1.16        | .364    |             |         |
| Partner employed wave 4                         | 0.54          | .613    | 0.53        | .619    |             |         |
| Partner work hours wave 4                       | –0.01         | .770    | –0.01       | .799    |             |         |
| Partner log earnings wave 4                     | 0.07          | .921    | 0.10        | .887    |             |         |
| Partner uses flexible work wave 4               | 0.60          | .414    | 0.64        | .380    |             |         |
| Pseudo R <sup>2</sup>                           | 0.23          |         | 0.24        |         |             |         |

*Source:* Understanding Society waves 2–4. *Note:* n=131. There were few respondents with a child aged 2 and these respondents did not differ in the dependent variable. Similarly, whether the partner was self-employed perfectly predicted the outcome variable. As a result, respondents with a child aged 2 or with a partner who was self-employed were excluded from this analysis. Telework perfectly predicted employment and therefore the analysis for telework was not done.

**Table A3–34: logistic regression of the likelihood of reducing working hours on (perceived) access to flexible work – only first child–no upper limit working hours**

|                                                           | Flexible work |         | Flexitime   |         | Telework    |         | Flexitime & Telework |         |
|-----------------------------------------------------------|---------------|---------|-------------|---------|-------------|---------|----------------------|---------|
|                                                           | Coefficient   | p-value | Coefficient | p-value | Coefficient | p-value | Coefficient          | p-value |
| Constant                                                  | 6.42          | .122    | 9.25        | .046    | 4.88        | .240    | 9.48                 | .061    |
| <i>Main variables</i>                                     |               |         |             |         |             |         |                      |         |
| No access to flexible work/flexitime in either wave (ref) |               |         |             |         |             |         |                      |         |
| Access to flexible work/flexitime in wave 4 only          | –0.79         | .488    | –1.22       | .312    |             |         | –1.21                | .326    |
| Access to flexible work/flexitime in wave 2 only          | –0.03         | .973    | 0.18        | .847    |             |         | 0.37                 | .703    |
| Access to flexible work/flexitime in both waves           | –1.87         | .017    | –1.96       | .006    |             |         | –1.83                | .027    |
| No access to telework in either wave (ref)                |               |         |             |         |             |         |                      |         |
| Access to telework in wave 4 only                         |               |         |             |         | –1.88       | .033    | –0.79                | .434    |
| Access to telework in wave 2 only                         |               |         |             |         | –0.49       | .682    | –0.35                | .779    |
| Access to telework in both waves                          |               |         |             |         | –0.72       | .359    | 0.35                 | .705    |
| <i>Control variables</i>                                  |               |         |             |         |             |         |                      |         |
| Works small part-time (<16 hours/week) wave 2             | –             | –       | –           | –       | –           | –       | –                    | –       |
| Works large part-time (16–34 hours/week) wave 2           | –1.80         | .025    | –1.77       | .032    | –1.38       | .064    | –1.72                | .039    |
| Works full-time (35–47 hours/week) wave 2 (ref)           |               |         |             |         |             |         |                      |         |
| Works long hours (48 hours/week or more) wave 2           | 4.79          | .030    | 4.92        | .024    | 4.92        | .022    | 5.08                 | .022    |
| Age wave 4                                                | –0.11         | .125    | –0.11       | .130    | –0.13       | .097    | –0.11                | .148    |
| Age youngest child                                        |               |         |             |         |             |         |                      |         |
| 0 wave 4 (ref)                                            |               |         |             |         |             |         |                      |         |
| 1 wave 4                                                  | 1.94          | .011    | 1.91        | .013    | 1.63        | .030    | 1.92                 | .015    |
| 2 wave 4                                                  | 4.37          | .029    | 4.79        | .020    | 3.01        | .079    | 4.77                 | .028    |
| Gender attitude wave 2                                    | 0.12          | .782    | 0.03        | .946    | 0.04        | .926    | 0.01                 | .976    |
| Having a degree wave 4                                    | –0.96         | .248    | –1.21       | .155    | –1.21       | .132    | –1.35                | .130    |
| Working in private sector wave 4                          | 0.72          | .279    | 0.42        | .534    | 0.76        | .261    | 0.53                 | .455    |
| Union present wave 4                                      | –0.73         | .290    | –0.74       | .282    | –0.53       | .439    | –0.69                | .325    |
| Occupational level wave 4                                 |               |         |             |         |             |         |                      |         |
| Management / professional (ref)                           |               |         |             |         |             |         |                      |         |
| Skilled work                                              | –0.01         | .986    | –0.04       | .960    | –0.01       | .990    | –0.06                | .948    |
| Partly skilled or unskilled work                          | –0.25         | .824    | –0.32       | .768    | 0.13        | .908    | –0.34                | .759    |
| Log corrected wage wave 4                                 | 0.22          | .775    | –0.04       | .958    | 0.52        | .508    | –0.04                | .966    |
| Living with partner wave 4                                | –4.58         | .022    | –4.73       | .020    | –3.88       | .048    | –4.80                | .021    |
| Partner employed wave 4                                   | 5.10          | .003    | 5.13        | .003    | 4.55        | .003    | 5.25                 | .002    |
| Partner self-employed wave 4                              | 3.33          | .049    | 3.00        | .070    | 3.25        | .049    | 3.16                 | .059    |
| Partner work hours wave 4                                 | 0.01          | .868    | –0.02       | .526    | –0.01       | .799    | –0.03                | .474    |
| Partner log earnings wave 4                               | –0.25         | .592    | –0.27       | .566    | –0.17       | .700    | –0.29                | .559    |
| Partner uses flexible work wave 4                         | –2.08         | .007    | –2.30       | .004    | –1.97       | .007    | –2.36                | .004    |
| Pseudo R <sup>2</sup>                                     | 0.31          |         | 0.32        |         | 0.28        |         | 0.33                 |         |

Source: Understanding Society waves 2–4. Note: n=117. There are no women who works in a small part-time job in wave 2 in this sample.

**Table A3–35: logistic regression of the likelihood of reducing working hours on use of flexible work – only first child– no upper limit working hours**

|                                                     | Flexible work |         | Flexitime   |         | Telework    |         | Flexitime & Telework |         |
|-----------------------------------------------------|---------------|---------|-------------|---------|-------------|---------|----------------------|---------|
|                                                     | Coefficient   | p-value | Coefficient | p-value | Coefficient | p-value | Coefficient          | p-value |
| Constant                                            | 6.55          | .116    | 7.35        | .077    | 6.25        | .129    | 7.97                 | .069    |
| <i>Main variables</i>                               |               |         |             |         |             |         |                      |         |
| No use flexible work/flexitime in either wave (ref) |               |         |             |         |             |         |                      |         |
| Use flexible work/flexitime in wave 4 only          | -3.53         | .022    | –           | –       |             |         | –                    | –       |
| Use flexible work/flexitime in wave 2 only          | 0.10          | .926    | -0.07       | .943    |             |         | -0.29                | .792    |
| Use flexible work/flexitime in both waves           | -1.60         | .025    | -2.09       | .009    |             |         | -2.44                | .010    |
| No use telework in either wave (ref)                |               |         |             |         |             |         |                      |         |
| Use telework in wave 4 only                         |               |         |             |         | -1.75       | .245    | -1.17                | .516    |
| Use telework in wave 2 only                         |               |         |             |         | –           | –       | –                    | –       |
| Use telework in both waves                          |               |         |             |         | -0.34       | .790    | 0.70                 | .631    |
| <i>Control variables</i>                            |               |         |             |         |             |         |                      |         |
| Works small part-time (<16 hours/week) wave 2       | –             | –       | –           | –       | –           | –       | –                    | –       |
| Works large part-time (16–34 hours/week) wave 2     | -1.77         | .028    | -1.61       | .044    | -1.10       | .151    | -1.39                | .085    |
| Works full-time (35–47 hours/week) wave 2 (ref)     |               |         |             |         |             |         |                      |         |
| Works long hours (48 hours/week or more) wave 2     | 5.37          | .012    | 4.81        | .040    | 5.10        | .016    | 5.02                 | .031    |
| Age wave 4                                          | -0.12         | .105    | -0.09       | .247    | -0.12       | .090    | -0.07                | .366    |
| Age youngest child                                  |               |         |             |         |             |         |                      |         |
| 0 wave 4 (ref)                                      |               |         |             |         |             |         |                      |         |
| 1 wave 4                                            | 1.70          | .029    | 1.92        | .014    | 1.58        | .034    | 1.80                 | .023    |
| 2 wave 4                                            | 3.64          | .039    | 4.02        | .027    | 3.30        | .041    | 4.12                 | .028    |
| Gender attitude wave 2                              | 0.06          | .895    | 0.09        | .840    | 0.00        | .991    | 0.21                 | .635    |
| Having a degree wave 4                              | -0.90         | .251    | -0.77       | .320    | -1.00       | .193    | -0.60                | .468    |
| Working in private sector wave 4                    | 0.70          | .292    | 0.53        | .430    | 0.99        | .127    | 0.67                 | .345    |
| Union present wave 4                                | -0.65         | .361    | -0.62       | .369    | -0.30       | .650    | -0.44                | .534    |
| Occupational level wave 4                           |               |         |             |         |             |         |                      |         |
| Management / professional (ref)                     |               |         |             |         |             |         |                      |         |
| Skilled work                                        | -0.49         | .578    | -0.32       | .709    | 0.02        | .983    | -0.20                | .825    |
| Partly skilled or unskilled work                    | -0.38         | .730    | -0.07       | .948    | 0.01        | .996    | -0.04                | .968    |
| Log corrected wage wave 4                           | 0.02          | .982    | -0.06       | .944    | 0.44        | .581    | -0.21                | .799    |
| Living with partner wave 4                          | -4.50         | .025    | -4.88       | .019    | -4.08       | .039    | -5.12                | .018    |
| Partner employed wave 4                             | 5.06          | .002    | 4.77        | .005    | 4.39        | .005    | 4.84                 | .005    |
| Partner self-employed wave 4                        | 4.13          | .022    | 3.23        | .065    | 3.12        | .064    | 3.18                 | .077    |
| Partner work hours wave 4                           | 0.00          | .964    | -0.02       | .546    | 0.01        | .864    | -0.02                | .667    |
| Partner log earnings wave 4                         | -0.17         | .727    | -0.22       | .627    | -0.45       | .350    | -0.35                | .485    |
| Partner uses flexible work wave 4                   | -2.06         | .007    | -1.97       | .010    | -1.99       | .007    | -1.77                | .022    |
| Pseudo R <sup>2</sup>                               | 0.33          |         | 0.30        |         | 0.27        |         | 0.32                 |         |

*Source:* Understanding Society waves 2–4. *Note:* n=117 for flexible work; 115 for flexitime as only two observations exist for flexitime in wave 4 only; 114 for telework as only three observation exists for telework in wave 2 only, 112 for flexitime and telework. There are no women who works in a small part-time job in wave 2 in this sample.

### **3.8 Only having access but no use as reference category**

For this robustness check we looked at the question whether we are mixing access to and use of flexible work too much when having this combined in the reference category (no access is no use in analyses presented in the paper). In this robustness check we look at what happens if we separate out the access from the use and have ‘access to but no use of flexible work’ as the reference category.

We still see similar results as to our analyses presented in the paper. We do not see a significant relationship between (perceived) access to flexible work/flexitime/telework and employment of the mother in wave 4. We do still see that the use of flexitime is significantly related to a reduction of working hours in wave 4. With having access but not using flexitime in either wave as reference category, mothers had a likelihood of about 58% to reduce their working hours. This was reduced to about 25% when the mother was using flexitime in both waves.

On the subsample of first-time mothers, we again find no significant relationship between flexible work, flexitime or telework and the likelihood of being employed. For the model on reduction of working hours for first-time mothers we again ran into problems with sample size and not all effects could be estimated. However, the general pattern that if the mother is working with flexitime in both waves she is less likely to reduce her working hours remains (though only marginally significant in this model). When the mother did have access but was not using flexitime in either wave, she had a likelihood of about 73% to reduce her working hours. However, if she was using flexitime in both waves, this likelihood was only 43%.

**Table A3–36: logistic regression of the likelihood of being employed on use flexible work – ref category access but no use flexibility**

|                                                      | Flexible work |         | Flexitime   |         | Telework    |         |
|------------------------------------------------------|---------------|---------|-------------|---------|-------------|---------|
|                                                      | Coefficient   | p-value | Coefficient | p-value | Coefficient | p-value |
| Constant                                             | 1.32          | .556    | 1.21        | .558    | 1.70        | .474    |
| <i>Main variables</i>                                |               |         |             |         |             |         |
| Use flexible work/flexitime/telework wave 2          | 0.45          | .374    | 0.31        | .619    | 0.62        | .493    |
| No access to flexible work/flexitime/telework wave 2 | 0.00          | 1.000   | –0.11       | .759    | –0.16       | .799    |
| <i>Control variables</i>                             |               |         |             |         |             |         |
| Age wave 4                                           | 0.04          | .209    | 0.04        | .245    | 0.04        | .209    |
| Age youngest child                                   |               |         |             |         |             |         |
| 0 wave 4 (ref)                                       |               |         |             |         |             |         |
| 1 wave 4                                             | 1.08          | .001    | 1.08        | .001    | 1.10        | .001    |
| Total number of children in household                |               |         |             |         |             |         |
| 1 wave 4 (ref)                                       |               |         |             |         |             |         |
| 2 wave 4                                             | 0.26          | .526    | 0.27        | .502    | 0.25        | .527    |
| 3 or more wave 4                                     | –0.59         | .204    | –0.50       | .273    | –0.60       | .197    |
| Gender attitude wave 2                               | 0.37          | .021    | 0.37        | .020    | 0.38        | .019    |
| Having a degree wave 4                               | –0.17         | .648    | –0.16       | .674    | –0.19       | .622    |
| Works small part-time (<16 hours/week) wave 2        | –1.06         | .060    | –1.04       | .065    | –1.03       | .066    |
| Works large part-time (16–34 hours/week) wave 2      | 0.01          | .975    | 0.05        | .894    | 0.05        | .893    |
| Works full-time (35–47 hours/week) wave 2 (ref)      |               |         |             |         |             |         |
| Works long hours (48 hours/week or more) wave 2      | 0.00          | .998    | 0.06        | .932    | –0.01       | .990    |
| Working in private sector wave 2                     | –0.70         | .102    | –0.67       | .112    | –0.73       | .087    |
| Union present wave 2                                 | 0.74          | .061    | 0.66        | .086    | 0.69        | .071    |
| Occupational level wave 2                            |               |         |             |         |             |         |
| Management / professional (ref)                      |               |         |             |         |             |         |
| Skilled work                                         | 0.17          | .700    | 0.14        | .757    | 0.14        | .741    |
| Partly skilled or unskilled work                     | –0.65         | .213    | –0.70       | .178    | –0.69       | .181    |
| Log corrected wage wave 2                            | –0.16         | .681    | –0.11       | .776    | –0.20       | .608    |
| Living with partner wave 4                           | 0.17          | .804    | 0.18        | .791    | 0.12        | .866    |
| Partner employed wave 4                              | 0.38          | .546    | 0.38        | .545    | 0.40        | .520    |
| Partner self-employed wave 4                         | 0.75          | .385    | 0.76        | .378    | 0.79        | .361    |
| Partner work hours wave 4                            | –0.02         | .280    | –0.02       | .304    | –0.02       | .262    |
| Partner log earnings wave 4                          | –0.12         | .654    | –0.11       | .681    | –0.11       | .677    |
| Partner uses flexible work wave 4                    | 0.70          | .118    | 0.70        | .119    | 0.72        | .110    |
| Pseudo R <sup>2</sup>                                | 0.20          |         | 0.20        |         | 0.20        |         |

*Source:* Understanding Society waves 2–4. *Note:* n=335. There were few respondents with a child aged 2 and these respondents did not differ in the dependent variable. As a result, these were excluded from this analysis.

**Table A3–37: logistic regression of the likelihood of reducing working hours on use of flexible work– ref category access but no use flexibility**

|                                                     | Flexible work |         | Flexitime   |         | Telework    |         | Flexitime & Telework |         |
|-----------------------------------------------------|---------------|---------|-------------|---------|-------------|---------|----------------------|---------|
|                                                     | Coefficient   | p-value | Coefficient | p-value | Coefficient | p-value | Coefficient          | p-value |
| Constant                                            | 5.85          | .012    | 5.38        | .015    | 3.92        | .075    | 4.20                 | .067    |
| <i>Main variables</i>                               |               |         |             |         |             |         |                      |         |
| No use flexible work/flexitime in either wave (ref) |               |         |             |         |             |         |                      |         |
| Use flexible work/flexitime in wave 4 only          | –1.88         | .033    | –0.94       | .355    |             |         | –0.96                | .382    |
| Use flexible work/flexitime in wave 2 only          | –0.83         | .255    | –0.66       | .390    |             |         | –0.38                | .645    |
| Use flexible work/flexitime in both waves           | –1.83         | .001    | –2.28       | .001    |             |         | –2.20                | .003    |
| No access to flexible work/flexitime in wave 2 only | –0.03         | .940    | –0.30       | .400    |             |         | –0.53                | .160    |
| No access to flexible work/flexitime in wave 4 only | –1.86         | .174    | –           | –       |             |         | –                    | –       |
| No access to flexible work/flexitime in either wave | –0.72         | .378    | –0.44       | .611    |             |         | –0.57                | .532    |
| No use telework in either wave (ref)                |               |         |             |         |             |         |                      |         |
| Use telework in wave 4 only                         |               |         |             |         | –1.02       | .555    | –0.37                | .853    |
| Use telework in wave 2 only                         |               |         |             |         | 0.51        | .687    | 0.95                 | .481    |
| Use flexible place in both waves                    |               |         |             |         | 0.00        | .996    | 0.49                 | .586    |
| No access to telework in wave 2 only                |               |         |             |         | 1.00        | .028    | 1.04                 | .039    |
| No access to telework in wave 4 only                |               |         |             |         | –0.72       | .531    | –0.51                | .707    |
| No access to telework in either wave                |               |         |             |         | –           | –       | –                    | –       |
| <i>Control variables</i>                            |               |         |             |         |             |         |                      |         |
| Works small part-time (<16 hours/week) wave 2       | –2.24         | .016    | –2.04       | .024    | –2.17       | .017    | –2.11                | .022    |
| Works large part-time (16–34 hours/week) wave 2     | –1.50         | <.001   | –1.38       | <.001   | –1.41       | <.001   | –1.43                | <.001   |
| Works full-time (35–47 hours/week) wave 2 (ref)     |               |         |             |         |             |         |                      |         |
| Works long hours (48 hours/week or more) wave 2     | 1.85          | .021    | 1.55        | .051    | 1.91        | .017    | 1.60                 | .053    |
| Age wave 4                                          | –0.03         | .422    | –0.01       | .774    | –0.02       | .519    | –0.01                | .824    |
| Age youngest child                                  |               |         |             |         |             |         |                      |         |
| 0 wave 4 (ref)                                      |               |         |             |         |             |         |                      |         |
| 1 wave 4                                            | 0.89          | .027    | 0.89        | .027    | 0.81        | .039    | 0.88                 | .032    |
| 2 wave 4                                            | 1.60          | .032    | 1.49        | .037    | 1.53        | .034    | 1.48                 | .043    |
| Total number of children in household               |               |         |             |         |             |         |                      |         |
| 1 wave 4 (ref)                                      |               |         |             |         |             |         |                      |         |
| 2 wave 4                                            | –1.53         | <.001   | –1.68       | <.001   | –1.56       | <.001   | –1.79                | <.001   |
| 3 or more wave 4                                    | –1.11         | .034    | –1.39       | .008    | –1.10       | .032    | –1.36                | .011    |
| Gender attitude wave 2                              | –0.23         | .237    | –0.20       | .283    | –0.28       | .132    | –0.20                | .312    |
| Having a degree wave 4                              | –0.61         | .142    | –0.66       | .110    | –0.59       | .146    | –0.61                | .149    |
| Working in private sector wave 4                    | 0.60          | .144    | 0.36        | .374    | 0.65        | .111    | 0.44                 | .299    |
| Union present wave 4                                | 0.12          | .757    | 0.15        | .702    | 0.17        | .663    | 0.12                 | .764    |
| Occupational level wave 4                           |               |         |             |         |             |         |                      |         |
| Management / professional (ref)                     |               |         |             |         |             |         |                      |         |
| Skilled work                                        | –1.33         | .005    | –1.10       | .015    | –1.18       | .009    | –1.14                | .015    |
| Partly skilled or unskilled work                    | –0.63         | .284    | –0.43       | .463    | –0.46       | .418    | –0.42                | .477    |

|                                   |       |       |       |       |       |       |       |       |
|-----------------------------------|-------|-------|-------|-------|-------|-------|-------|-------|
| Log corrected wage wave 4         | -0.25 | .553  | -0.27 | .516  | -0.15 | .708  | -0.17 | .692  |
| Living with partner wave 4        | -3.94 | <.001 | -3.88 | <.001 | -4.00 | <.001 | -4.03 | <.001 |
| Partner employed wave 4           | 3.18  | .001  | 2.95  | .001  | 3.21  | .001  | 3.16  | .001  |
| Partner self-employed wave 4      | 3.70  | <.001 | 3.42  | .001  | 3.64  | .001  | 3.66  | .001  |
| Partner work hours wave 4         | -0.01 | .585  | -0.01 | .494  | -0.01 | .696  | -0.01 | .515  |
| Partner log earnings wave 4       | -0.13 | .478  | -0.09 | .585  | -0.13 | .437  | -0.10 | .542  |
| Partner uses flexible work wave 4 | -0.63 | .127  | -0.68 | .095  | -0.65 | .101  | -0.66 | .109  |
| Pseudo R <sup>2</sup>             | 0.32  |       | 0.29  |       | 0.29  |       | 0.31  |       |

*Source:* Understanding Society waves 2–4. *Note:* n=272 for flexible work, 266 for flexitime (due to very low number of cases who did not have access to flexitime in wave 4 only perfectly predicting likelihood of reducing one's working hours), 271 for telework (due to very low number of cases who did not have access to telework in either wave), 265 for flexitime and telework.



**Table A3–38: logistic regression of the likelihood of being employed on use flexible work – only first child – ref category access but no use flexibility**

|                                                      | Flexible work |         | Flexitime   |         | Telework    |         |
|------------------------------------------------------|---------------|---------|-------------|---------|-------------|---------|
|                                                      | Coefficient   | p-value | Coefficient | p-value | Coefficient | p-value |
| Constant                                             | 3.04          | .569    | 2.72        | .622    |             |         |
| <i>Main variables</i>                                |               |         |             |         |             |         |
| Use flexible work/flexitime/telework wave 2          | 0.64          | .506    | 1.32        | .312    | –           | –       |
| No access to flexible work/flexitime/telework wave 2 | –0.73         | .248    | –0.62       | .392    |             |         |
| <i>Control variables</i>                             |               |         |             |         |             |         |
| Age wave 4                                           | –0.09         | .130    | –0.09       | .131    |             |         |
| Age youngest child                                   |               |         |             |         |             |         |
| 0 wave 4 (ref)                                       |               |         |             |         |             |         |
| 1 wave 4                                             | 0.09          | .891    | 0.18        | .777    |             |         |
| Gender attitude wave 2                               | –0.15         | .649    | –0.12       | .703    |             |         |
| Having a degree wave 4                               | 0.12          | .856    | 0.19        | .771    |             |         |
| Works small part-time (<16 hours/week) wave 2        | –1.70         | .307    | –1.77       | .295    |             |         |
| Works large part-time (16–34 hours/week) wave 2      | 0.60          | .507    | 0.63        | .479    |             |         |
| Works full-time (35–47 hours/week) wave 2 (ref)      |               |         |             |         |             |         |
| Works long hours (48 hours/week or more) wave 2      | 0.59          | .511    | 0.60        | .510    |             |         |
| Working in private sector wave 2                     | –0.42         | .643    | –0.21       | .821    |             |         |
| Union present wave 2                                 | 1.28          | .071    | 1.38        | .055    |             |         |
| Occupational level wave 2                            |               |         |             |         |             |         |
| Management / professional (ref)                      |               |         |             |         |             |         |
| Skilled work                                         | –0.49         | .504    | –0.54       | .469    |             |         |
| Partly skilled or unskilled work                     | –0.71         | .471    | –0.76       | .452    |             |         |
| Log corrected wage wave 2                            | –0.13         | .827    | –0.13       | .832    |             |         |
| Living with partner wave 4                           | 1.18          | .355    | 1.20        | .349    |             |         |
| Partner employed wave 4                              | 0.30          | .786    | 0.39        | .719    |             |         |
| Partner work hours wave 4                            | –0.01         | .774    | –0.01       | .879    |             |         |
| Partner log earnings wave 4                          | 0.13          | .859    | 0.09        | .903    |             |         |
| Partner uses flexible work wave 4                    | 0.59          | .428    | 0.64        | .388    |             |         |
| Pseudo R <sup>2</sup>                                | 0.24          |         | 0.24        |         |             |         |

*Source:* Understanding Society waves 2–4. *Note:* n=131. There were few respondents with a child aged 2 and these respondents did not differ in the dependent variable. Similarly, whether the partner was self-employed perfectly predicted the outcome variable. As a result, respondents with a child aged 2 or with a partner who was self-employed were excluded from this analysis. Telework perfectly predicted employment and therefore the analysis for telework was not done.

**Table A3–39: logistic regression of the likelihood of reducing working hours on use of flexible work – only first child – ref category access but no use flexibility**

|                                                     | Flexible work |         | Flexitime   |         | Telework    |         | Flexitime & Telework |         |
|-----------------------------------------------------|---------------|---------|-------------|---------|-------------|---------|----------------------|---------|
|                                                     | Coefficient   | p-value | Coefficient | p-value | Coefficient | p-value | Coefficient          | p-value |
| Constant                                            | 7.00          | .123    | 8.01        | .068    | 3.08        | .497    | 7.01                 | .181    |
| <i>Main variables</i>                               |               |         |             |         |             |         |                      |         |
| No use flexible work/flexitime in either wave (ref) |               |         |             |         |             |         |                      |         |
| Use flexible work/flexitime in wave 4 only          | –3.46         | .049    | –           | –       |             |         | –                    | –       |
| Use flexible work/flexitime in wave 2 only          | –0.79         | .535    | –0.62       | .605    |             |         | –1.63                | .237    |
| Use flexible work/flexitime in both waves           | –1.38         | .074    | –1.70       | .059    |             |         | –2.19                | .049    |
| No access to flexible work/flexitime in wave 2 only | 0.90          | .273    | 0.88        | .236    |             |         | 0.78                 | .375    |
| No access to flexible work/flexitime in wave 4 only | –             | –       | –           | –       |             |         | –                    | –       |
| No access to flexible work/flexitime in either wave | –             | –       | –           | –       |             |         | –                    | –       |
| No use telework in either wave (ref)                |               |         |             |         |             |         |                      |         |
| Use telework in wave 4 only                         |               |         |             |         | –           | –       | –                    | –       |
| Use telework in wave 2 only                         |               |         |             |         | –           | –       | –                    | –       |
| Use telework in both waves                          |               |         |             |         | 0.59        | .661    | 1.50                 | .349    |
| No access to telework in wave 2 only                |               |         |             |         | 1.35        | .052    | 1.22                 | .145    |
| No access to telework in wave 4 only                |               |         |             |         | –0.73       | .658    | 0.44                 | .803    |
| No access to telework in either wave                |               |         |             |         | –           | –       | –                    | –       |
| <i>Control variables</i>                            |               |         |             |         |             |         |                      |         |
| Works small part-time (<16 hours/week) wave 2       | –             | –       | –           | –       | –           | –       | –                    | –       |
| Works large part-time (16–34 hours/week) wave 2     | –2.37         | .008    | –2.26       | .013    | –1.16       | .133    | –2.22                | .020    |
| Works full-time (35–47 hours/week) wave 2 (ref)     |               |         |             |         |             |         |                      |         |
| Works long hours (48 hours/week or more) wave 2     | 5.49          | .025    | 5.39        | .025    | 4.79        | .021    | 5.64                 | .022    |
| Age wave 4                                          | –0.16         | .049    | –0.14       | .091    | –0.11       | .141    | –0.13                | .159    |
| Age youngest child                                  |               |         |             |         |             |         |                      |         |
| 0 wave 4 (ref)                                      |               |         |             |         |             |         |                      |         |
| 1 wave 4                                            | 1.87          | .021    | 1.97        | .013    | 1.53        | .040    | 2.04                 | .017    |
| 2 wave 4                                            | 4.39          | .028    | 4.77        | .018    | 2.78        | .092    | 5.03                 | .023    |
| Gender attitude wave 2                              | 0.24          | .599    | 0.11        | .809    | 0.16        | .700    | 0.46                 | .356    |
| Having a degree wave 4                              | –0.68         | .409    | –0.78       | .327    | –0.90       | .267    | –0.59                | .535    |
| Working in private sector wave 4                    | 0.77          | .273    | 0.57        | .400    | 0.99        | .147    | 0.84                 | .262    |
| Union present wave 4                                | –0.86         | .242    | –0.76       | .285    | –0.28       | .682    | –0.57                | .445    |
| Occupational level wave 4                           |               |         |             |         |             |         |                      |         |
| Management / professional (ref)                     |               |         |             |         |             |         |                      |         |
| Skilled work                                        | 0.03          | .974    | 0.09        | .923    | 0.19        | .828    | 0.50                 | .640    |
| Partly skilled or unskilled work                    | 0.20          | .865    | 0.35        | .753    | 0.33        | .768    | 0.79                 | .521    |
| Log corrected wage wave 4                           | 0.17          | .833    | –0.01       | .994    | 0.71        | .401    | 0.23                 | .797    |
| Living with partner wave 4                          | –4.35         | .037    | –4.86       | .020    | –3.98       | .044    | –5.07                | .023    |
| Partner employed wave 4                             | 5.32          | .003    | 5.24        | .003    | 4.47        | .004    | 5.47                 | .003    |

|                                   |       |      |       |      |       |      |       |      |
|-----------------------------------|-------|------|-------|------|-------|------|-------|------|
| Partner self-employed wave 4      | 3.82  | .040 | 3.31  | .055 | 3.03  | .073 | 2.96  | .091 |
| Partner work hours wave 4         | 0.00  | .907 | -0.03 | .398 | 0.00  | .910 | -0.02 | .542 |
| Partner log earnings wave 4       | -0.28 | .618 | -0.16 | .728 | -0.41 | .422 | -0.44 | .431 |
| Partner uses flexible work wave 4 | -2.13 | .009 | -2.21 | .006 | -1.82 | .014 | -2.07 | .016 |
| Pseudo R <sup>2</sup>             | 0.35  |      | 0.33  |      | 0.28  |      | 0.37  |      |

*Source:* Understanding Society waves 2–4. *Note:* n=111 for flexible work as two categories of flexible work had very few cases that perfectly predicted the outcome variable; 112 for flexitime as two categories for flexitime had very few cases that perfectly predicted the outcome variable; 113 for telework as some categories for telework had very few cases and perfectly predicted the outcome variable, 109 for flexitime and telework. There are no women who work in a small part-time job in wave 2 in this sample.

### 3.9 Various definitions of reduction of working hours

For this robustness check we looked at the question whether the cut-off point of a reduction of working hours of more than 4 hours/week matters. In this robustness check we look at what happens if we do the analyses for any working hours reduction, more than 8 hours, and more than 10%.

In the analyses with reduction of working hours of more than 4 hours/week that was presented in the main analysis, we showed that (perceived) access to telework in wave 4 only or in both waves was negatively related to the likelihood of reducing working hours. When changing the definition of reduction of working hours, we do not see this anymore. Only for a reduction of more than 8 hours/week we see that (perceived) access to telework in both waves is significantly negatively related to the likelihood of reducing working hours.

In the analyses presented in the paper we also saw that use of flexitime in both waves was negatively related to reducing working hours. We do not see this anymore when we look at *any* reduction (in that case, we only see it for using flexitime in wave 4 only), but we do see it when looking at a reduction of more than 8 hours or a reduction of more than 10% of the working hours. Hence, we only see it when we are looking at substantial reductions of working hours (more than 4 hours, more than 8 hours, or more than 10%).

Hence, these additional analyses provide additional evidence for the statement that the effect of (perceived) access to telework is less stable than the effect of flexitime. For flexitime it matters less how we define a reduction of working hours as long as we are talking about a substantial reduction of hours.

**Table A3–40: logistic regression of the likelihood of reducing working hours on (perceived) access to flexible work – ANY reduction**

|                                                           | Flexible work |         | Flexitime   |         | Telework    |         | Flexitime & Telework |         |
|-----------------------------------------------------------|---------------|---------|-------------|---------|-------------|---------|----------------------|---------|
|                                                           | Coefficient   | p-value | Coefficient | p-value | Coefficient | p-value | Coefficient          | p-value |
| Constant                                                  | 7.83          | <.001   | 7.93        | <.001   | 7.24        | .001    | 7.50                 | .001    |
| <i>Main variables</i>                                     |               |         |             |         |             |         |                      |         |
| No access to flexible work/flexitime in either wave (ref) |               |         |             |         |             |         |                      |         |
| Access to flexible work/flexitime in wave 4 only          | –0.48         | .344    | –0.07       | .879    |             |         | –0.02                | .966    |
| Access to flexible work/flexitime in wave 2 only          | –0.68         | .157    | –0.28       | .536    |             |         | –0.18                | .699    |
| Access to flexible work/flexitime in both waves           | –0.77         | .036    | –0.61       | .098    |             |         | –0.23                | .590    |
| No access to telework in either wave (ref)                |               |         |             |         |             |         |                      |         |
| Access to telework in wave 4 only                         |               |         |             |         | –1.09       | .048    | –0.97                | .108    |
| Access to telework in wave 2 only                         |               |         |             |         | –0.27       | .721    | –0.15                | .844    |
| Access to telework in both waves                          |               |         |             |         | –0.81       | .080    | –0.69                | .178    |
| <i>Control variables</i>                                  |               |         |             |         |             |         |                      |         |
| Works small part-time (<16 hours/week) wave 2             | –1.82         | .015    | –1.66       | .024    | –1.72       | .022    | –1.71                | .022    |
| Works large part-time (16–34 hours/week) wave 2           | –1.05         | .005    | –1.04       | .005    | –1.07       | .004    | –1.08                | .004    |
| Works full-time (35–47 hours/week) wave 2 (ref)           |               |         |             |         |             |         |                      |         |
| Works long hours (48 hours/week or more) wave 2           | 0.84          | .257    | 0.76        | .296    | 0.90        | .219    | 0.83                 | .262    |
| Age wave 4                                                | –0.02         | .635    | –0.01       | .720    | –0.01       | .686    | –0.01                | .677    |
| Age youngest child                                        |               |         |             |         |             |         |                      |         |
| 0 wave 4 (ref)                                            |               |         |             |         |             |         |                      |         |
| 1 wave 4                                                  | 0.60          | .107    | 0.57        | .121    | 0.54        | .142    | 0.55                 | .141    |
| 2 wave 4                                                  | 0.52          | .447    | 0.60        | .374    | 0.54        | .428    | 0.56                 | .412    |
| Total number of children in household                     |               |         |             |         |             |         |                      |         |
| 1 wave 4 (ref)                                            |               |         |             |         |             |         |                      |         |
| 2 wave 4                                                  | –0.87         | .021    | –0.89       | .017    | –0.96       | .012    | –0.96                | .012    |
| 3 or more wave 4                                          | –1.19         | .017    | –1.23       | .014    | –1.16       | .021    | –1.19                | .019    |
| Gender attitude wave 2                                    | 0.05          | .756    | 0.02        | .901    | 0.03        | .851    | 0.03                 | .868    |
| Having a degree wave 4                                    | –0.12         | .747    | –0.14       | .700    | –0.05       | .894    | –0.07                | .853    |
| Working in private sector wave 4                          | –0.09         | .816    | –0.22       | .574    | –0.11       | .767    | –0.15                | .699    |
| Union present wave 4                                      | 0.07          | .856    | 0.12        | .765    | 0.03        | .946    | 0.04                 | .910    |
| Occupational level wave 4                                 |               |         |             |         |             |         |                      |         |
| Management / professional (ref)                           |               |         |             |         |             |         |                      |         |
| Skilled work                                              | –0.84         | .037    | –0.85       | .033    | –0.92       | .023    | –0.90                | .026    |
| Partly skilled or unskilled work                          | –0.61         | .282    | –0.60       | .284    | –0.58       | .302    | –0.62                | .276    |
| Log corrected wage wave 4                                 | –0.62         | .107    | –0.67       | .080    | –0.62       | .108    | –0.62                | .106    |
| Living with partner wave 4                                | –3.71         | <.001   | –3.61       | <.001   | –3.66       | <.001   | –3.69                | <.001   |
| Partner employed wave 4                                   | 2.51          | .002    | 2.36        | .003    | 2.49        | .002    | 2.49                 | .002    |
| Partner self-employed wave 4                              | 2.81          | .003    | 2.63        | .005    | 2.73        | .004    | 2.74                 | .004    |
| Partner work hours wave 4                                 | –0.00         | .831    | –0.00       | .772    | –0.00       | .772    | –0.00                | .771    |
| Partner log earnings wave 4                               | –0.17         | .304    | –0.18       | .270    | –0.12       | .465    | –0.13                | .431    |
| Partner uses flexible work wave 4                         | –0.64         | .082    | –0.61       | .091    | –0.63       | .088    | –0.62                | .090    |
| Pseudo R <sup>2</sup>                                     | 0.19          |         | 0.18        |         | 0.19        |         | 0.19                 |         |

Source: Understanding Society waves 2–4. Note: n=272.

**Table A3–41: logistic regression of the likelihood of reducing working hours on use of flexible work – ANY reduction**

|                                                     | Flexible work |         | Flexitime   |         | Telework    |         | Flexitime & Telework |         |
|-----------------------------------------------------|---------------|---------|-------------|---------|-------------|---------|----------------------|---------|
|                                                     | Coefficient   | p-value | Coefficient | p-value | Coefficient | p-value | Coefficient          | p-value |
| Constant                                            | 8.16          | <.001   | 7.73        | <.001   | 7.24        | .001    | 7.65                 | <.001   |
| <i>Main variables</i>                               |               |         |             |         |             |         |                      |         |
| No use flexible work/flexitime in either wave (ref) |               |         |             |         |             |         |                      |         |
| Use flexible work/flexitime in wave 4 only          | -1.89         | .002    | -1.82       | .015    |             |         | -1.60                | .040    |
| Use flexible work/flexitime in wave 2 only          | -1.12         | .027    | -1.01       | .055    |             |         | -0.97                | .065    |
| Use flexible work/flexitime in both waves           | -0.96         | .037    | -1.04       | .068    |             |         | -0.89                | .152    |
| No use telework in either wave (ref)                |               |         |             |         |             |         |                      |         |
| Use telework in wave 4 only                         |               |         |             |         | -1.63       | .030    | -0.98                | .250    |
| Use telework in wave 2 only                         |               |         |             |         | -0.52       | .657    | -0.28                | .817    |
| Use telework in both waves                          |               |         |             |         | -0.05       | .941    | 0.28                 | .723    |
| <i>Control variables</i>                            |               |         |             |         |             |         |                      |         |
| Works small part-time (<16 hours/week) wave 2       | -1.88         | .015    | -1.66       | .027    | -1.56       | .035    | -1.65                | .029    |
| Works large part-time (16–34 hours/week) wave 2     | -1.13         | .003    | -1.01       | .008    | -0.93       | .012    | -0.97                | .011    |
| Works full-time (35–47 hours/week) wave 2 (ref)     |               |         |             |         |             |         |                      |         |
| Works long hours (48 hours/week or more) wave 2     | 1.07          | .149    | 0.73        | .317    | 1.05        | .146    | 0.77                 | .290    |
| Age wave 4                                          | -0.02         | .565    | -0.01       | .704    | -0.01       | .714    | -0.01                | .709    |
| Age youngest child                                  |               |         |             |         |             |         |                      |         |
| 0 wave 4 (ref)                                      |               |         |             |         |             |         |                      |         |
| 1 wave 4                                            | 0.56          | .134    | 0.54        | .151    | 0.47        | .209    | 0.53                 | .167    |
| 2 wave 4                                            | 0.49          | .485    | 0.49        | .476    | 0.38        | .567    | 0.42                 | .538    |
| Total number of children in household               |               |         |             |         |             |         |                      |         |
| 1 wave 4 (ref)                                      |               |         |             |         |             |         |                      |         |
| 2 wave 4                                            | -0.75         | .053    | -0.91       | .018    | -0.90       | .017    | -0.93                | .017    |
| 3 or more wave 4                                    | -1.03         | .041    | -1.20       | .019    | -1.21       | .016    | -1.25                | .016    |
| Gender attitude wave 2                              | 0.10          | .595    | 0.07        | .685    | 0.05        | .770    | 0.08                 | .653    |
| Having a degree wave 4                              | -0.05         | .897    | -0.06       | .870    | -0.04       | .910    | -0.03                | .937    |
| Working in private sector wave 4                    | -0.12         | .755    | -0.26       | .510    | -0.10       | .794    | -0.25                | .540    |
| Union present wave 4                                | -0.05         | .906    | -0.01       | .990    | 0.03        | .943    | -0.01                | .985    |
| Occupational level wave 4                           |               |         |             |         |             |         |                      |         |
| Management / professional (ref)                     |               |         |             |         |             |         |                      |         |
| Skilled work                                        | -0.98         | .019    | -0.84       | .041    | -0.90       | .028    | -0.84                | .046    |
| Partly skilled or unskilled work                    | -0.63         | .270    | -0.59       | .299    | -0.52       | .353    | -0.59                | .303    |
| Log corrected wage wave 4                           | -0.73         | .065    | -0.67       | .087    | -0.66       | .086    | -0.66                | .093    |
| Living with partner wave 4                          | -3.60         | <.001   | -3.48       | .001    | 3.54        | <.001   | -3.54                | .001    |
| Partner employed wave 4                             | 2.53          | .002    | 2.32        | .004    | 2.39        | .003    | 2.36                 | .004    |
| Partner self-employed wave 4                        | 3.09          | .002    | 2.81        | .004    | 2.69        | .004    | 2.87                 | .003    |
| Partner work hours wave 4                           | -0.01         | .658    | -0.00       | .823    | -0.01       | .687    | -0.01                | .742    |
| Partner log earnings wave 4                         | -0.14         | .397    | -0.16       | .337    | -0.12       | .448    | -0.14                | .386    |
| Partner uses flexible work wave 4                   | -0.53         | .159    | -0.57       | .126    | -0.61       | .094    | -0.58                | .118    |
| Pseudo R <sup>2</sup>                               | 0.22          |         | 0.21        |         | 0.19        |         | 0.21                 |         |

Source: Understanding Society waves 2–4. Note: n=272.

**Table A3–42: logistic regression of the likelihood of reducing working hours on (perceived) access to flexible work – more than 8 hours reduction**

|                                                           | Flexible work |         | Flexitime   |         | Telework    |         | Flexitime & Telework |         |
|-----------------------------------------------------------|---------------|---------|-------------|---------|-------------|---------|----------------------|---------|
|                                                           | Coefficient   | p-value | Coefficient | p-value | Coefficient | p-value | Coefficient          | p-value |
| Constant                                                  | 1.22          | .588    | 1.09        | .629    | 0.57        | .804    | 0.04                 | .987    |
| <i>Main variables</i>                                     |               |         |             |         |             |         |                      |         |
| No access to flexible work/flexitime in either wave (ref) |               |         |             |         |             |         |                      |         |
| Access to flexible work/flexitime in wave 4 only          | -0.64         | .238    | -0.12       | .821    |             |         | -0.06                | .908    |
| Access to flexible work/flexitime in wave 2 only          | -0.12         | .809    | 0.24        | .630    |             |         | 0.30                 | .547    |
| Access to flexible work/flexitime in both waves           | -0.37         | .344    | -0.01       | .978    |             |         | 0.49                 | .285    |
| No access to telework in either wave (ref)                |               |         |             |         |             |         |                      |         |
| Access to telework in wave 4 only                         |               |         |             |         | -0.64       | .283    | -0.93                | .160    |
| Access to telework in wave 2 only                         |               |         |             |         | 0.05        | .958    | -0.16                | .860    |
| Access to telework in both waves                          |               |         |             |         | -0.93       | .068    | -1.18                | .037    |
| <i>Control variables</i>                                  |               |         |             |         |             |         |                      |         |
| Works small part-time (<16 hours/week) wave 2             | -2.31         | .050    | -2.29       | .055    | -2.33       | .050    | -2.39                | .047    |
| Works large part-time (16–34 hours/week) wave 2           | -1.08         | .007    | -1.06       | .008    | -1.16       | .005    | -1.14                | .006    |
| Works full-time (35–47 hours/week) wave 2 (ref)           |               |         |             |         |             |         |                      |         |
| Works long hours (48 hours/week or more) wave 2           | 1.24          | .047    | 1.27        | .041    | 1.23        | .048    | 1.39                 | .032    |
| Age wave 4                                                | 0.04          | .299    | 0.04        | .290    | 0.03        | .388    | 0.03                 | .371    |
| Age youngest child                                        |               |         |             |         |             |         |                      |         |
| 0 wave 4 (ref)                                            |               |         |             |         |             |         |                      |         |
| 1 wave 4                                                  | 1.10          | .008    | 1.12        | .007    | 1.10        | .008    | 1.10                 | .009    |
| 2 wave 4                                                  | 0.44          | .552    | 0.52        | .473    | 0.45        | .549    | 0.42                 | .581    |
| Total number of children in household                     |               |         |             |         |             |         |                      |         |
| 1 wave 4 (ref)                                            |               |         |             |         |             |         |                      |         |
| 2 wave 4                                                  | -1.49         | <.001   | -1.51       | <.001   | -1.53       | <.001   | -1.56                | <.001   |
| 3 or more wave 4                                          | -2.08         | <.001   | -2.07       | <.001   | -1.90       | .002    | -1.87                | .002    |
| Gender attitude wave 2                                    | -0.08         | .675    | -0.09       | .642    | -0.09       | .650    | -0.08                | .691    |
| Having a degree wave 4                                    | -0.73         | .070    | -0.75       | .062    | -0.68       | .098    | -0.66                | .106    |
| Working in private sector wave 4                          | 0.70          | .089    | 0.65        | .110    | 0.67        | .107    | 0.73                 | .082    |
| Union present wave 4                                      | 0.00          | .995    | 0.04        | .918    | -0.04       | .926    | -0.07                | .862    |
| Occupational level wave 4                                 |               |         |             |         |             |         |                      |         |
| Management / professional (ref)                           |               |         |             |         |             |         |                      |         |
| Skilled work                                              | -0.52         | .248    | -0.50       | .255    | -0.53       | .248    | -0.53                | .244    |
| Partly skilled or unskilled work                          | -0.29         | .627    | -0.22       | .706    | -0.30       | .609    | -0.23                | .700    |
| Log corrected wage wave 4                                 | -0.13         | .775    | -0.16       | .722    | -0.01       | .985    | 0.03                 | .956    |
| Living with partner wave 4                                | -5.15         | <.001   | -5.06       | <.001   | -5.13       | <.001   | -5.15                | <.001   |
| Partner employed wave 4                                   | 3.40          | .004    | 3.26        | .005    | 3.37        | .004    | 3.41                 | .004    |
| Partner self-employed wave 4                              | 3.02          | .016    | 2.97        | .018    | 3.05        | .016    | 3.17                 | .013    |
| Partner work hours wave 4                                 | 0.01          | .667    | 0.01        | .673    | 0.01        | .699    | 0.01                 | .651    |
| Partner log earnings wave 4                               | -0.02         | .913    | -0.02       | .918    | 0.03        | .904    | 0.05                 | .839    |
| Partner uses flexible work wave 4                         | -0.64         | .103    | -0.66       | .098    | -0.65       | .102    | -0.68                | .093    |

---

|                       |      |      |      |      |
|-----------------------|------|------|------|------|
| Pseudo R <sup>2</sup> | 0.27 | 0.27 | 0.28 | 0.28 |
|-----------------------|------|------|------|------|

*Source:* Understanding Society waves 2–4. *Note:* n=272.



**Table A3–43: logistic regression of the likelihood of reducing working hours on use of flexible work – more than 8 hours reduction**

|                                                     | Flexible work |         | Flexitime   |         | Telework    |         | Flexitime & Telework |         |
|-----------------------------------------------------|---------------|---------|-------------|---------|-------------|---------|----------------------|---------|
|                                                     | Coefficient   | p-value | Coefficient | p-value | Coefficient | p-value | Coefficient          | p-value |
| Constant                                            | 1.64          | .494    | 1.29        | .575    | 0.89        | .694    | 1.35                 | .565    |
| <i>Main variables</i>                               |               |         |             |         |             |         |                      |         |
| No use flexible work/flexitime in either wave (ref) |               |         |             |         |             |         |                      |         |
| Use flexible work/flexitime in wave 4 only          | -2.44         | .008    | -0.26       | .770    |             |         | -0.10                | .911    |
| Use flexible work/flexitime in wave 2 only          | -0.33         | .560    | 0.09        | .876    |             |         | 0.08                 | .896    |
| Use flexible work/flexitime in both waves           | -1.49         | .007    | -2.04       | .006    |             |         | -2.04                | .008    |
| No use telework in either wave (ref)                |               |         |             |         |             |         |                      |         |
| Use telework in wave 4 only                         |               |         |             |         | -0.94       | .304    | -0.70                | .491    |
| Use telework in wave 2 only                         |               |         |             |         | 0.63        | .604    | 1.07                 | .420    |
| Use telework in both waves                          |               |         |             |         | -0.81       | .337    | -0.27                | .751    |
| <i>Control variables</i>                            |               |         |             |         |             |         |                      |         |
| Works small part-time (<16 hours/week) wave 2       | -2.24         | .060    | -2.14       | .067    | -2.14       | .068    | -2.09                | .075    |
| Works large part-time (16–34 hours/week) wave 2     | -1.17         | .005    | -1.09       | .008    | -1.02       | .012    | -1.05                | .011    |
| Works full-time (35–47 hours/week) wave 2 (ref)     |               |         |             |         |             |         |                      |         |
| Works long hours (48 hours/week or more) wave 2     | 1.42          | .035    | 0.97        | .119    | 1.34        | .035    | 1.02                 | .111    |
| Age wave 4                                          | 0.04          | .345    | 0.05        | .193    | 0.03        | .382    | 0.05                 | .227    |
| Age youngest child                                  |               |         |             |         |             |         |                      |         |
| 0 wave 4 (ref)                                      |               |         |             |         |             |         |                      |         |
| 1 wave 4                                            | 1.07          | .012    | 1.17        | .006    | 1.00        | .016    | 1.09                 | .011    |
| 2 wave 4                                            | 0.28          | .711    | 0.46        | .534    | 0.43        | .563    | 0.42                 | .571    |
| Total number of children in household               |               |         |             |         |             |         |                      |         |
| 1 wave 4 (ref)                                      |               |         |             |         |             |         |                      |         |
| 2 wave 4                                            | -1.59         | <.001   | -1.71       | <.001   | -1.53       | <.001   | -1.72                | <.001   |
| 3 or more wave 4                                    | -1.99         | .001    | -2.29       | <.001   | -1.94       | .001    | -2.22                | <.001   |
| Gender attitude wave 2                              | -0.06         | .774    | -0.00       | .982    | -0.09       | .652    | 0.00                 | 1.000   |
| Having a degree wave 4                              | -0.64         | .125    | -0.66       | .107    | -0.71       | .079    | -0.64                | .121    |
| Working in private sector wave 4                    | 0.65          | .122    | 0.49        | .230    | 0.72        | .076    | 0.53                 | .206    |
| Union present wave 4                                | -0.09         | .833    | 0.01        | .975    | -0.00       | .994    | 0.02                 | .962    |
| Occupational level wave 4                           |               |         |             |         |             |         |                      |         |
| Management / professional (ref)                     |               |         |             |         |             |         |                      |         |
| Skilled work                                        | -0.68         | .148    | -0.48       | .295    | -0.52       | .250    | -0.50                | .291    |
| Partly skilled or unskilled work                    | -0.51         | .401    | -0.28       | .643    | -0.23       | .690    | -0.29                | .632    |
| Log corrected wage wave 4                           | -0.18         | .694    | -0.17       | .712    | -0.07       | .876    | -0.15                | .741    |
| Living with partner wave 4                          | -5.28         | <.001   | -5.24       | <.001   | -4.88       | <.001   | -5.15                | <.001   |
| Partner employed wave 4                             | 3.65          | .002    | 3.31        | .004    | 3.26        | .005    | 3.32                 | .005    |
| Partner self-employed wave 4                        | 3.33          | .010    | 2.87        | .022    | 2.94        | .020    | 2.87                 | .023    |
| Partner work hours wave 4                           | 0.01          | .692    | 0.00        | .923    | 0.01        | .674    | 0.00                 | .891    |
| Partner log earnings wave 4                         | -0.02         | .947    | 0.00        | 1.000   | -0.02       | .929    | -0.01                | .949    |
| Partner uses flexible work wave 4                   | -0.65         | .118    | -0.66       | .106    | -0.65       | .102    | -0.65                | .114    |
| Pseudo R <sup>2</sup>                               | 0.31          |         | 0.30        |         | 0.28        |         | 0.30                 |         |

Source: Understanding Society waves 2–4. Note: n=272.

**Table A3–44: logistic regression of the likelihood of reducing working hours on (perceived) access to flexible work – more than 10% reduction**

|                                                           | Flexible work |         | Flexitime   |         | Telework    |         | Flexitime & Telework |         |
|-----------------------------------------------------------|---------------|---------|-------------|---------|-------------|---------|----------------------|---------|
|                                                           | Coefficient   | p-value | Coefficient | p-value | Coefficient | p-value | Coefficient          | p-value |
| Constant                                                  | 5.71          | .005    | 5.80        | .005    | 5.22        | .010    | 5.25                 | .012    |
| <i>Main variables</i>                                     |               |         |             |         |             |         |                      |         |
| No access to flexible work/flexitime in either wave (ref) |               |         |             |         |             |         |                      |         |
| Access to flexible work/flexitime in wave 4 only          | -0.01         | .987    | 0.27        | .568    |             |         | 0.33                 | .493    |
| Access to flexible work/flexitime in wave 2 only          | 0.03          | .944    | -0.02       | .965    |             |         | 0.09                 | .852    |
| Access to flexible work/flexitime in both waves           | -0.54         | .124    | -0.44       | .217    |             |         | -0.00                | .996    |
| No access to telework in either wave (ref)                |               |         |             |         |             |         |                      |         |
| Access to telework in wave 4 only                         |               |         |             |         | -1.13       | .042    | -1.12                | .063    |
| Access to telework in wave 2 only                         |               |         |             |         | 0.04        | .960    | 0.08                 | .918    |
| Access to telework in both waves                          |               |         |             |         | -0.93       | .045    | -0.88                | .085    |
| <i>Control variables</i>                                  |               |         |             |         |             |         |                      |         |
| Works small part-time (<16 hours/week) wave 2             | -2.29         | .011    | -2.19       | .014    | -2.33       | .010    | -2.31                | .011    |
| Works large part-time (16–34 hours/week) wave 2           | -0.88         | .015    | -0.87       | .015    | -0.93       | .011    | -0.95                | .010    |
| Works full-time (35–47 hours/week) wave 2 (ref)           |               |         |             |         |             |         |                      |         |
| Works long hours (48 hours/week or more) wave 2           | 0.85          | .185    | 0.80        | .216    | 0.97        | .134    | 0.94                 | .157    |
| Age wave 4                                                | -0.03         | .395    | -0.03       | .394    | -0.03       | .318    | -0.03                | .331    |
| Age youngest child                                        |               |         |             |         |             |         |                      |         |
| 0 wave 4 (ref)                                            |               |         |             |         |             |         |                      |         |
| 1 wave 4                                                  | 0.66          | .070    | 0.64        | .079    | 0.60        | .095    | 0.62                 | .088    |
| 2 wave 4                                                  | 1.11          | .098    | 1.10        | .098    | 1.05        | .118    | 1.09                 | .108    |
| Total number of children in household                     |               |         |             |         |             |         |                      |         |
| 1 wave 4 (ref)                                            |               |         |             |         |             |         |                      |         |
| 2 wave 4                                                  | -1.16         | .001    | -1.18       | .001    | -1.21       | .001    | -1.23                | .001    |
| 3 or more wave 4                                          | -1.32         | .007    | -1.37       | .005    | -1.26       | .011    | -1.27                | .010    |
| Gender attitude wave 2                                    | -0.32         | .070    | -0.32       | .066    | -0.32       | .070    | -0.32                | .068    |
| Having a degree wave 4                                    | -0.84         | .027    | -0.87       | .021    | -0.80       | .038    | -0.82                | .035    |
| Working in private sector wave 4                          | 0.41          | .282    | 0.34        | .371    | 0.44        | .238    | 0.41                 | .289    |
| Union present wave 4                                      | 0.22          | .544    | 0.24        | .524    | 0.14        | .706    | 0.13                 | .727    |
| Occupational level wave 4                                 |               |         |             |         |             |         |                      |         |
| Management / professional (ref)                           |               |         |             |         |             |         |                      |         |
| Skilled work                                              | -1.12         | .007    | -1.08       | .008    | -1.13       | .007    | -1.14                | .007    |
| Partly skilled or unskilled work                          | -0.77         | .158    | -0.71       | .194    | -0.75       | .169    | -0.74                | .179    |
| Log corrected wage wave 4                                 | -0.14         | .706    | -0.16       | .673    | -0.09       | .817    | -0.09                | .813    |
| Living with partner wave 4                                | -3.53         | <.001   | -3.45       | <.001   | -3.61       | <.001   | -3.58                | <.001   |
| Partner employed wave 4                                   | 2.62          | .002    | 2.50        | .002    | 2.73        | .001    | 2.68                 | .001    |
| Partner self-employed wave 4                              | 2.62          | .005    | 2.50        | .007    | 2.75        | .004    | 2.71                 | .004    |
| Partner work hours wave 4                                 | -0.00         | .846    | -0.01       | .743    | -0.00       | .808    | -0.00                | .770    |
| Partner log earnings wave 4                               | -0.18         | .254    | -0.17       | .268    | -0.11       | .495    | -0.11                | .492    |
| Partner uses flexible work wave 4                         | -0.65         | .074    | -0.65       | .076    | -0.65       | .077    | -0.65                | .078    |

Pseudo R<sup>2</sup>

0.20

0.20

0.22

0.22

---

*Source: Understanding Society waves 2–4. Note: n=272.*

**Table A3–45: logistic regression of the likelihood of reducing working hours on use of flexible work – more than 10% reduction**

|                                                     | Flexible work |         | Flexitime   |         | Telework    |         | Flexitime & Telework |         |
|-----------------------------------------------------|---------------|---------|-------------|---------|-------------|---------|----------------------|---------|
|                                                     | Coefficient   | p-value | Coefficient | p-value | Coefficient | p-value | Coefficient          | p-value |
| Constant                                            | 6.02          | .005    | 5.77        | .005    | 5.28        | .009    | 5.80                 | .005    |
| <i>Main variables</i>                               |               |         |             |         |             |         |                      |         |
| No use flexible work/flexitime in either wave (ref) |               |         |             |         |             |         |                      |         |
| Use flexible work/flexitime in wave 4 only          | –1.40         | .024    | –1.05       | .158    |             |         | –0.82                | .291    |
| Use flexible work/flexitime in wave 2 only          | –0.74         | .143    | –0.41       | .439    |             |         | –0.38                | .478    |
| Use flexible work/flexitime in both waves           | –1.61         | .001    | –1.82       | .003    |             |         | –1.74                | .006    |
| No use telework in either wave (ref)                |               |         |             |         |             |         |                      |         |
| Use telework in wave 4 only                         |               |         |             |         | –1.46       | .069    | –1.03                | .255    |
| Use telework in wave 2 only                         |               |         |             |         | 0.05        | .965    | 0.42                 | .730    |
| Use telework in both waves                          |               |         |             |         | –0.74       | .334    | –0.30                | .700    |
| <i>Control variables</i>                            |               |         |             |         |             |         |                      |         |
| Works small part-time (<16 hours/week) wave 2       | –2.33         | .010    | –2.11       | .018    | –2.12       | .018    | –2.08                | .020    |
| Works large part-time (16–34 hours/week) wave 2     | –0.92         | .014    | –0.81       | .029    | –0.77       | .033    | –0.78                | .036    |
| Works full-time (35–47 hours/week) wave 2 (ref)     |               |         |             |         |             |         |                      |         |
| Works long hours (48 hours/week or more) wave 2     | 0.89          | .168    | 0.63        | .332    | 1.11        | .088    | 0.72                 | .272    |
| Age wave 4                                          | –0.04         | .296    | –0.02       | .493    | –0.03       | .323    | –0.03                | .450    |
| Age youngest child                                  |               |         |             |         |             |         |                      |         |
| 0 wave 4 (ref)                                      |               |         |             |         |             |         |                      |         |
| 1 wave 4                                            | 0.62          | .096    | 0.63        | .087    | 0.49        | .173    | 0.56                 | .129    |
| 2 wave 4                                            | 1.01          | .142    | 0.96        | .151    | 0.91        | .167    | 0.91                 | .173    |
| Total number of children in household               |               |         |             |         |             |         |                      |         |
| 1 wave 4 (ref)                                      |               |         |             |         |             |         |                      |         |
| 2 wave 4                                            | –1.18         | .002    | –1.32       | <.001   | –1.15       | .001    | –1.33                | <.001   |
| 3 or more wave 4                                    | –1.28         | .011    | –1.52       | .002    | –1.24       | .011    | –1.48                | .004    |
| Gender attitude wave 2                              | –0.25         | .170    | –0.24       | .171    | –0.30       | .083    | –0.24                | .179    |
| Having a degree wave 4                              | –0.76         | .051    | –0.80       | .037    | –0.76       | .043    | –0.76                | .048    |
| Working in private sector wave 4                    | 0.43          | .259    | 0.26        | .504    | 0.49        | .194    | 0.30                 | .441    |
| Union present wave 4                                | 0.11          | .774    | 0.19        | .617    | 0.13        | .730    | 0.16                 | .683    |
| Occupational level wave 4                           |               |         |             |         |             |         |                      |         |
| Management / professional (ref)                     |               |         |             |         |             |         |                      |         |
| Skilled work                                        | –1.23         | .004    | –1.09       | .010    | –1.12       | .007    | –1.13                | .009    |
| Partly skilled or unskilled work                    | –0.86         | .121    | –0.76       | .167    | –0.67       | .214    | –0.79                | .153    |
| Log corrected wage wave 4                           | –0.16         | .672    | –0.17       | .652    | –0.14       | .716    | –0.17                | .661    |
| Living with partner wave 4                          | –3.51         | <.001   | –3.50       | <.001   | –3.35       | .001    | –3.46                | <.001   |
| Partner employed wave 4                             | 2.74          | .001    | 2.55        | .002    | 2.58        | .002    | 2.59                 | .002    |
| Partner self-employed wave 4                        | 2.84          | .003    | 2.59        | .006    | 2.63        | .005    | 2.65                 | .005    |
| Partner work hours wave 4                           | –0.01         | .678    | –0.01       | .597    | –0.00       | .765    | –0.01                | .587    |
| Partner log earnings wave 4                         | –0.14         | .374    | –0.14       | .373    | –0.13       | .395    | –0.14                | .383    |
| Partner uses flexible work wave 4                   | –0.63         | .099    | –0.63       | .093    | –0.64       | .082    | –0.62                | .098    |
| Pseudo R <sup>2</sup>                               | 0.24          |         | 0.23        |         | 0.21        |         | 0.23                 |         |

Source: Understanding Society waves 2–4. Note: n=272.

#### **Web appendix 4: Who has access to flexible work?**

For this question, we select all women in the dataset who are in employment (not unemployed, inactive, on maternity leave, or self-employed) regardless of parental status. We include both individual and work variables as individual variables may affect how individuals seek out flexible work. We did the analyses separately for wave 2 and for wave 4. Results (see tables on next pages) clearly show that most work-related as well as individual-related variables are significantly related to whether an individual reports access to flexible work, and flexitime and telework. Clearly, not everyone (perceives she) has equal access to flexible work, and especially those with higher human capital – in higher occupational statuses, higher education, with managerial roles are those who are likely to have access to flexible work arrangements.

**Table A4–1: logistic regression of the likelihood of having access to flexible work – wave 2**

|                                              | Flexible work |         | Flexitime   |         | Telework    |         |
|----------------------------------------------|---------------|---------|-------------|---------|-------------|---------|
|                                              | Coefficient   | p-value | Coefficient | p-value | Coefficient | p-value |
| Constant                                     | 0.04          | .873    | –0.53       | .032    | –2.66       | <.001   |
| <i>Work characteristics</i>                  |               |         |             |         |             |         |
| Private sector                               | –0.12         | .062    | –0.17       | .011    | –0.37       | .001    |
| Union present                                | 0.28          | <.001   | 0.47        | <.001   | –0.26       | .003    |
| <i>Managerial duties</i>                     |               |         |             |         |             |         |
| Manager (ref)                                |               |         |             |         |             |         |
| Foreman / Supervisor                         | –0.16         | .039    | –0.16       | .038    | –0.45       | <.001   |
| Not manager / supervisor                     | –0.27         | <.001   | –0.20       | .002    | –0.26       | .002    |
| Log corrected hourly wages                   | 0.21          | <.001   | 0.15        | .001    | 0.75        | <.001   |
| <i>ISCO</i>                                  |               |         |             |         |             |         |
| Managers (ref)                               |               |         |             |         |             |         |
| Professionals                                | –0.41         | <.001   | –0.26       | .005    | –0.46       | <.001   |
| Technicians and associate professionals      | –0.33         | <.001   | 0.19        | .032    | –0.65       | <.001   |
| Clerical support workers                     | –0.10         | .239    | 0.05        | .571    | –0.58       | <.001   |
| Service and sales workers                    | –0.50         | <.001   | –0.42       | <.001   | 1.62        | <.001   |
| Craft and related trades workers             | –0.15         | .585    | 0.06        | .847    | –0.94       | .129    |
| Plant and machine operators                  | –0.90         | <.001   | –0.54       | .009    | –0.97       | .005    |
| Elementary occupations                       | –0.97         | <.001   | –0.76       | <.001   | –1.73       | <.001   |
| Armed forces and agriculture workers         | –1.20         | .155    | –1.45       | .121    | –           | –       |
| Permanent job                                | –0.06         | .437    | –0.09       | .297    | –0.09       | .490    |
| Performance related pay                      | 0.20          | .001    | 0.20        | .001    | 0.24        | .002    |
| <i>Sector</i>                                |               |         |             |         |             |         |
| Industry (ref)                               |               |         |             |         |             |         |
| Construction                                 | –0.12         | .517    | –0.03       | .864    | –0.33       | .161    |
| Wholesale, retail, food and accommodation    | –0.37         | <.001   | –0.16       | .127    | –1.52       | <.001   |
| Transport                                    | –0.43         | .006    | –0.37       | .027    | –0.32       | .185    |
| Financial services                           | 0.23          | .061    | 0.35        | .005    | –0.37       | .018    |
| Public admin. and defence                    | 0.93          | <.001   | 1.21        | <.001   | –0.16       | .338    |
| Education                                    | –1.45         | <.001   | –1.33       | <.001   | –1.38       | <.001   |
| Health                                       | –0.15         | .139    | 0.04        | .733    | –0.99       | <.001   |
| Other services – academic and administrative | 0.11          | .306    | 0.14        | .190    | 0.05        | .706    |
| Other services – other                       | –0.20         | .123    | –0.04       | .757    | –0.48       | .015    |
| <i>Payment type</i>                          |               |         |             |         |             |         |
| Salaried (ref)                               |               |         |             |         |             |         |

|                              |       |       |       |       |       |       |
|------------------------------|-------|-------|-------|-------|-------|-------|
| Basic salary plus commission | -0.47 | .033  | -0.82 | .001  | 0.16  | .579  |
| Paid by the hour             | -0.23 | <.001 | -0.30 | <.001 | -0.90 | <.001 |
| Other                        | -0.34 | .068  | -0.77 | .001  | 0.00  | .994  |
| <i>Occupational size</i>     |       |       |       |       |       |       |
| Micro (1–9) (ref)            |       |       |       |       |       |       |
| Small (10–49)                | -0.05 | .409  | 0.03  | .639  | -0.48 | <.001 |
| Medium (50–499)              | 0.21  | .001  | 0.26  | <.001 | -0.31 | .002  |
| Large (500+)                 | 0.57  | <.001 | 0.57  | <.001 | 0.16  | .134  |
| <i>Individual variables</i>  |       |       |       |       |       |       |
| Degree                       | 0.15  | .002  | 0.10  | .050  | 0.27  | <.001 |
| Age                          | -0.01 | <.001 | -0.01 | <.001 | -0.01 | .001  |
| <i>Number of children</i>    |       |       |       |       |       |       |
| No children (ref)            |       |       |       |       |       |       |
| 1 child                      | 0.03  | .549  | 0.00  | .963  | -0.03 | .709  |
| 2 children                   | 0.12  | .020  | 0.06  | .292  | 0.00  | .958  |
| 3 or more children           | 0.10  | .194  | 0.08  | .291  | -0.02 | .885  |
| Living with a partner        | 0.11  | .013  | 0.11  | .020  | 0.24  | .001  |
| Longstanding illness         | 0.13  | .007  | 0.08  | .104  | 0.17  | .018  |
| Care                         | 0.10  | .059  | 0.08  | .150  | 0.07  | .392  |
| Pseudo R <sup>2</sup>        | 0.13  |       | 0.14  |       | 0.22  |       |

*Source:* Understanding Society wave 4, women only. *Note:* n=12,501 for flexible work and flexitime and n=12,493 for telework due to perfect prediction of one category.

**Table A4–2: logistic regression of the likelihood of having access to flexible work – wave 4**

|                                              | Flexible work |         | Flexitime   |         | Telework    |         |
|----------------------------------------------|---------------|---------|-------------|---------|-------------|---------|
|                                              | Coefficient   | p-value | Coefficient | p-value | Coefficient | p-value |
| Constant                                     | 0.59          | .029    | –0.04       | .880    | –2.20       | <.001   |
| <i>Work characteristics</i>                  |               |         |             |         |             |         |
| Private sector                               | –0.23         | .001    | –0.30       | <.001   | –0.47       | <.001   |
| Union present                                | 0.26          | <.001   | 0.44        | <.001   | –0.40       | <.001   |
| <i>Managerial duties</i>                     |               |         |             |         |             |         |
| Manager (ref)                                |               |         |             |         |             |         |
| Foreman / Supervisor                         | –0.23         | .006    | –0.37       | <.001   | –0.51       | <.001   |
| Not manager / supervisor                     | –0.31         | <.001   | –0.41       | <.001   | –0.27       | .002    |
| Log corrected hourly wages                   | 0.10          | .044    | 0.04        | .478    | 0.67        | <.001   |
| <i>ISCO</i>                                  |               |         |             |         |             |         |
| Managers (ref)                               |               |         |             |         |             |         |
| Professionals                                | –0.41         | <.001   | –0.17       | .085    | –0.13       | .261    |
| Technicians and associate professionals      | –0.32         | .001    | –0.03       | .731    | –0.47       | <.001   |
| Clerical support workers                     | –0.10         | .320    | 0.18        | .058    | –0.42       | <.001   |
| Service and sales workers                    | –0.61         | <.001   | –0.33       | .001    | –1.74       | <.001   |
| Craft and related trades workers             | 0.19          | .517    | 0.55        | .072    | –1.10       | .081    |
| Plant and machine operators                  | –1.02         | <.001   | –0.74       | .002    | –1.50       | .001    |
| Elementary occupations                       | –0.98         | <.001   | –0.70       | <.001   | –2.28       | <.001   |
| Armed forces and agriculture workers         | 0.23          | .737    | –0.42       | .563    | –           | –       |
| Permanent job                                | –0.07         | .403    | –0.05       | .597    | –0.20       | .161    |
| Performance related pay                      | 0.24          | .001    | 0.24        | .001    | 0.09        | .340    |
| <i>Sector</i>                                |               |         |             |         |             |         |
| Industry (ref)                               |               |         |             |         |             |         |
| Construction                                 | 0.11          | .572    | 0.27        | .193    | 0.10        | .683    |
| Wholesale, retail, food and accommodation    | –0.10         | .378    | 0.07        | .557    | –0.99       | <.001   |
| Transport                                    | 0.07          | .698    | 0.04        | .830    | –0.30       | .281    |
| Financial services                           | 0.06          | .650    | 0.35        | .010    | –0.38       | .025    |
| Public admin. and defence                    | 0.90          | <.001   | 1.18        | <.001   | 0.06        | .720    |
| Education                                    | –1.38         | <.001   | –1.23       | <.001   | –1.46       | <.001   |
| Health                                       | –0.10         | .369    | 0.16        | .180    | –1.04       | <.001   |
| Other services – academic and administrative | 0.24          | .036    | 0.31        | .009    | 0.08        | .564    |
| Other services – other                       | 0.02          | .862    | 0.18        | .221    | –0.40       | .047    |
| <i>Payment type</i>                          |               |         |             |         |             |         |
| Salaried (ref)                               |               |         |             |         |             |         |
| Basic salary plus commission                 | –0.42         | .120    | –0.91       | .004    | –0.14       | .731    |



|                             |       |       |       |       |       |       |
|-----------------------------|-------|-------|-------|-------|-------|-------|
| Paid by the hour            | -0.37 | <.001 | -0.33 | <.001 | -0.91 | <.001 |
| Other                       | -0.51 | .012  | -0.38 | .089  | 0.24  | .409  |
| Occupational size           |       |       |       |       |       |       |
| Micro (1–9) (ref)           |       |       |       |       |       |       |
| Small (10–49)               | -0.14 | .032  | -0.06 | .364  | -0.49 | <.001 |
| Medium (50–499)             | 0.17  | .010  | 0.32  | <.001 | -0.27 | .010  |
| Large (500+)                | 0.65  | <.001 | 0.78  | <.001 | 0.22  | .053  |
| <i>Individual variables</i> |       |       |       |       |       |       |
| Degree                      | 0.17  | .001  | 0.05  | .338  | 0.21  | .006  |
| Age                         | -0.01 | <.001 | -0.01 | <.001 | -0.00 | .145  |
| Number of children          |       |       |       |       |       |       |
| No children (ref)           |       |       |       |       |       |       |
| 1 child                     | 0.02  | .709  | 0.03  | .559  | -0.11 | .210  |
| 2 children                  | 0.05  | .389  | 0.05  | .401  | -0.15 | .080  |
| 3 or more children          | -0.11 | .208  | -0.10 | .278  | -0.15 | .277  |
| Living with a partner       | 0.15  | .004  | 0.09  | .075  | 0.15  | .048  |
| Longstanding illness        | 0.19  | <.001 | 0.10  | .073  | 0.13  | .087  |
| Care                        | 0.14  | .012  | 0.05  | .396  | 0.02  | .837  |
| Pseudo R <sup>2</sup>       | 0.14  |       | 0.15  |       | 0.22  |       |

Source: Understanding Society wave 4, women only. Note: n=10,421 for flexible work and flexitime and n=10,410 for telework due to perfect prediction of one category.
